# Supplementary material for: cg04448376, cg24387542, cg08548498, and cg14621323 as a Novel Signature to Predict Prognosis in Kidney Renal Papillary Cell Carcinoma
Source: Hindawi journal article supplement (doi:10.1155/2020/4854390), 2020-01-01
Supplement: f1 [file 4854390.f1.zip]

**Table S4 the methylated sites of 9 hub genes**

| id        | TCGA. SX. <sup>†</sup> | TCGA. SX. <sup>†</sup> | TCGA. 2Z. <sup>†</sup> | TCGA. 4A. <sup>†</sup> | TCGA. 2Z. <sup>†</sup> | TCGA. GL. <sup>€</sup> | TCGA. BQ. <sup>7</sup> | TCGA. BQ. <sup>7</sup> |
|-----------|------------------------|------------------------|------------------------|------------------------|------------------------|------------------------|------------------------|------------------------|
| cg1570123 | 0.142277               | 0.063389               | 0.04754                | 0.761979               | 0.108136               | 0.087139               | 0.048761               | 0.056677               |
| cg0326652 | 0.297474               | 0.032528               | 0                      | 0.03179                | 0.140461               | 0.16701                | 0.034841               | 0                      |
| cg2009565 | 0.95397                | 0.946393               | 0.924622               | 0.942704               | 0.880359               | 0.932394               | 0.935494               | 0.853836               |
| cg2746738 | 0.016796               | 0.01763                | 0.028423               | 0.020779               | 0.030816               | 0.043512               | 0.04382                | 0.020822               |
| cg0795097 | 0                      | 0                      | 0                      | 0                      | 0                      | 0                      | 0                      | 0                      |
| cg0219252 | 0.090998               | 0.08471                | 0.213555               | 0.076374               | 0.199236               | 0.096881               | 0.273412               | 0.319942               |
| cg2348034 | 0.036616               | 0.046364               | 0.046439               | 0.098779               | 0.093049               | 0.504586               | 0.092158               | 0.173817               |
| cg2524718 | 0.013172               | 0.015389               | 0.014156               | 0.015313               | 0.013907               | 0.012622               | 0.012382               | 0.015226               |
| cg0479091 | 0                      | 0.045018               | 0                      | 0.062676               | 0.32951                | 0.258934               | 0.049165               | 0                      |
| cg2761935 | 0.079884               | 0.140534               | 0.119748               | 0.061805               | 0.124326               | 0.117155               | 0.140057               | 0.163741               |
| cg1359741 | 0.086164               | 0.090849               | 0.112755               | 0.117036               | 0.115862               | 0.221571               | 0.158706               | 0.11588                |
| cg0343001 | 0.145288               | 0.027668               | 0                      | 0.022293               | 0.102825               | 0.107849               | 0.023228               | 0                      |
| cg0051044 | 0.057644               | 0.038468               | 0.0337                 | 0.032877               | 0.043659               | 0.048383               | 0.043439               | 0.054814               |
| cg1421342 | 0                      | 0                      | 0                      | 0                      | 0                      | 0                      | 0                      | 0                      |
| cg1646310 | 0                      | 0                      | 0                      | 0                      | 0                      | 0                      | 0                      | 0                      |
| cg1756069 | 0                      | 0                      | 0                      | 0                      | 0                      | 0                      | 0                      | 0                      |
| cg0883522 | 0.029216               | 0.079881               | 0.035469               | 0.030003               | 0.057122               | 0.038465               | 0.074049               | 0.085504               |
| cg0647920 | 0.159583               | 0.04581                | 0                      | 0.022322               | 0.093005               | 0.075397               | 0.034914               | 0                      |
| cg0014215 | 0.038477               | 0.038388               | 0.036392               | 0.02846                | 0.034143               | 0.033776               | 0.041245               | 0.041519               |
| cg0444837 | 0                      | 0.04312                | 0                      | 0.069862               | 0                      | 0.294694               | 0.061763               | 0                      |
| cg1296687 | 0.07994                | 0.185936               | 0.072192               | 0.296171               | 0.141523               | 0.526557               | 0.258054               | 0.204295               |
| cg0493510 | 0.228862               | 0.277766               | 0.044271               | 0.225846               | 0.517269               | 0.033835               | 0.542854               | 0.033509               |
| cg2173744 | 0.17911                | 0.466662               | 0.076092               | 0.130628               | 0.114569               | 0.068052               | 0.346485               | 0.455011               |
| cg1095266 | 0.087822               | 0.071979               | 0.0832                 | 0.076938               | 0.083235               | 0.108794               | 0.083679               | 0.093105               |
| cg2438754 | 0.103115               | 0.072597               | 0.097873               | 0.142736               | 0.120568               | 0.228472               | 0.178323               | 0.116543               |
| cg2388901 | 0.551546               | 0.680015               | 0.136317               | 0.920758               | 0.364392               | 0.926285               | 0.819469               | 0.810124               |
| cg2106445 | 0.116949               | 0.19762                | 0.088105               | 0.064431               | 0.138746               | 0.114474               | 0.170575               | 0.216998               |
| cg0064246 | 0.560712               | 0.034851               | 0.031363               | 0.081322               | 0.02103                | 0.823506               | 0.719541               | 0.072279               |
| cg2682421 | 0.050099               | 0.038599               | 0.038632               | 0.700003               | 0.054198               | 0.077892               | 0.049089               | 0.047203               |
| cg1460940 | 0.233005               | 0.690086               | 0.106878               | 0.857697               | 0.141384               | 0.750839               | 0.791828               | 0.679084               |
| cg0684762 | 0.950888               | 0.238873               | 0.200905               | 0.618624               | 0.09162                | 0.814872               | 0.7543                 | 0.240543               |
| cg2613814 | 0.01368                | 0.018313               | 0.015999               | 0.008863               | 0.015608               | 0.015084               | 0.02447                | 0.019127               |
| cg0721976 | 0.122109               | 0.110879               | 0.076345               | 0.174654               | 0.099063               | 0.115512               | 0.117421               | 0.128199               |
| cg0854849 | 0.306952               | 0.066269               | 0.095256               | 0.650982               | 0.43211                | 0.819754               | 0.594725               | 0.438606               |
| cg1938343 | 0.044654               | 0.031309               | 0.026181               | 0.52063                | 0.032579               | 0.034097               | 0.031172               | 0.026537               |
| cg2594127 | 0                      | 0                      | 0                      | 0                      | 0                      | 0                      | 0                      | 0                      |
| cg1058774 | 0.065663               | 0.065326               | 0.056197               | 0.0417                 | 0.06601                | 0.059025               | 0.086863               | 0.063376               |
| cg1724364 | 0.123379               | 0.164453               | 0.331894               | 0.156606               | 0.246718               | 0.153033               | 0.370553               | 0.402867               |
| cg0766899 | 0.024715               | 0.041531               | 0.051285               | 0.288529               | 0.031394               | 0.302149               | 0.235056               | 0.102355               |
| cg0029266 | 0.063592               | 0.070995               | 0.077046               | 0.052767               | 0.076773               | 0.06963                | 0.07274                | 0.056832               |
| cg0128708 | 0.898214               | 0.517705               | 0.586124               | 0.484205               | 0.424175               | 0.856183               | 0.807232               | 0.43082                |
| cg0682295 | 0.013777               | 0.01204                | 0.012855               | 0.011146               | 0.013634               | 0.01047                | 0.009236               | 0.011816               |
| cg1985376 | 0.134042               | 0.335636               | 0.071778               | 0.074351               | 0.15023                | 0.175306               | 0.313403               | 0.299568               |
| cg0126410 | 0.048129               | 0.093932               | 0.04024                | 0.027876               | 0.04732                | 0.051732               | 0.077392               | 0.091948               |
| cg1462132 | 0.580772               | 0.350191               | 0.454634               | 0.866197               | 0.428559               | 0.851743               | 0.819771               | 0.497061               |
| cg1973373 | 0.065856               | 0.067223               | 0.040433               | 0.043298               | 0.098543               | 0.05433                | 0.151204               | 0.181373               |
| cg2680829 | 0.040079               | 0.03042                | 0.045322               | 0.027708               | 0.056877               | 0.056153               | 0.053949               | 0.062883               |

TCGA. A4. § TCGA. SX. ¶ TCGA. 5P. ¶ TCGA. G7. € TCGA. 2Z. ¶ TCGA. EV. § TCGA. SX. ¶ TCGA. 4A. ¶ TCGA. A4. ¶

|          |          |          |          |          |          |          |          |          |
|----------|----------|----------|----------|----------|----------|----------|----------|----------|
| 0.048366 | 0.080362 | 0.089791 | 0.041486 | 0.043099 | 0.04152  | 0.069683 | 0.049257 | 0.070893 |
| 0.035489 | 0.093358 | 0.045049 | 0.040537 | 0.105259 | 0.055317 | 0.21442  | 0        | 0.041245 |
| 0.91694  | 0.848165 | 0.923154 | 0.910324 | 0.791571 | 0.675672 | 0.382666 | 0.848188 | 0.933389 |
| 0.021397 | 0.021503 | 0.025586 | 0.034172 | 0.019891 | 0.027964 | 0.015907 | 0.019001 | 0.017631 |
| 0        | 0        | 0        | 0        | 0        | 0        | 0        | 0        | 0        |
| 0.421717 | 0.288162 | 0.289838 | 0.586054 | 0.215206 | 0.379024 | 0.118789 | 0.79885  | 0.519604 |
| 0.072125 | 0.029471 | 0.468614 | 0.095824 | 0.064458 | 0.072724 | 0.045091 | 0.120488 | 0.053594 |
| 0.01598  | 0.013684 | 0.016825 | 0.011706 | 0.011674 | 0.014761 | 0.011799 | 0.010755 | 0.01141  |
| 0.029453 | 0.166765 | 0.052556 | 0.047379 | 0.256896 | 0.062779 | 0.395919 | 0        | 0.108063 |
| 0.090219 | 0.108909 | 0.055665 | 0.26766  | 0.129054 | 0.153994 | 0.033541 | 0.166567 | 0.107102 |
| 0.170406 | 0.068766 | 0.500228 | 0.107197 | 0.050706 | 0.116655 | 0.19634  | 0.180085 | 0.067294 |
| 0.022592 | 0.062192 | 0.036353 | 0.028041 | 0.07919  | 0.026748 | 0.119033 | 0        | 0.037764 |
| 0.063383 | 0.045519 | 0.062593 | 0.107587 | 0.033802 | 0.072052 | 0.057223 | 0.068327 | 0.0517   |
| 0        | 0        | 0        | 0        | 0        | 0        | 0        | 0        | 0        |
| 0        | 0        | 0        | 0        | 0        | 0        | 0        | 0        | 0        |
| 0        | 0        | 0        | 0        | 0        | 0        | 0        | 0        | 0        |
| 0.042352 | 0.036228 | 0.056914 | 0.153388 | 0.049405 | 0.044202 | 0.034857 | 0.145505 | 0.043609 |
| 0.039516 | 0.063916 | 0.017682 | 0.052737 | 0.054947 | 0.044893 | 0.102365 | 0        | 0.04796  |
| 0.031364 | 0.041369 | 0.038362 | 0.037098 | 0.023226 | 0.035379 | 0.046789 | 0.039455 | 0.032533 |
| 0.083217 | 0.223989 | 0.052284 | 0.100824 | 0.308054 | 0.115644 | 0.37599  | 0        | 0.14407  |
| 0.129557 | 0.046781 | 0.563972 | 0.158245 | 0.115042 | 0.113937 | 0.04171  | 0.198572 | 0.077239 |
| 0.03027  | 0.189151 | 0.051323 | 0.124924 | 0.03587  | 0.072083 | 0.092111 | 0.067371 | 0.05501  |
| 0.062408 | 0.260795 | 0.212571 | 0.383222 | 0.257609 | 0.191253 | 0.15491  | 0.290439 | 0.167665 |
| 0.105533 | 0.088498 | 0.104985 | 0.090318 | 0.07326  | 0.091695 | 0.085708 | 0.106827 | 0.083221 |
| 0.136798 | 0.070297 | 0.477609 | 0.113454 | 0.064658 | 0.123017 | 0.221151 | 0.198998 | 0.084857 |
| 0.549545 | 0.15892  | 0.918311 | 0.619213 | 0.543569 | 0.260956 | 0.083517 | 0.656104 | 0.466228 |
| 0.09253  | 0.202345 | 0.119279 | 0.310777 | 0.185128 | 0.249983 | 0.176559 | 0.292833 | 0.189927 |
| 0.019956 | 0.062274 | 0.379634 | 0.035027 | 0.033085 | 0.028487 | 0.019838 | 0.135336 | 0.293542 |
| 0.033932 | 0.0445   | 0.052627 | 0.044846 | 0.029893 | 0.048234 | 0.049483 | 0.040091 | 0.053349 |
| 0.564771 | 0.12893  | 0.788801 | 0.457516 | 0.226029 | 0.259847 | 0.094355 | 0.562533 | 0.230651 |
| 0.024462 | 0.147547 | 0.523091 | 0.105494 | 0.101489 | 0.055928 | 0.031016 | 0.28647  | 0.726558 |
| 0.014354 | 0.019442 | 0.011987 | 0.025764 | 0.01379  | 0.012514 | 0.014536 | 0.012946 | 0.015545 |
| 0.07569  | 0.096033 | 0.229612 | 0.107228 | 0.104973 | 0.116375 | 0.062542 | 0.334262 | 0.093192 |
| 0.544012 | 0.129329 | 0.850263 | 0.420007 | 0.622757 | 0.124491 | 0.091722 | 0.259101 | 0.264453 |
| 0.024938 | 0.036685 | 0.050169 | 0.025846 | 0.02745  | 0.032032 | 0.051495 | 0.03753  | 0.027079 |
| 0        | 0        | 0        | 0        | 0        | 0        | 0        | 0        | 0        |
| 0.055018 | 0.046181 | 0.056423 | 0.079743 | 0.048141 | 0.059541 | 0.074104 | 0.074061 | 0.046233 |
| 0.678274 | 0.388891 | 0.408916 | 0.595491 | 0.320733 | 0.469638 | 0.180902 | 0.799936 | 0.52276  |
| 0.031476 | 0.037382 | 0.518771 | 0.078452 | 0.030795 | 0.088361 | 0.039708 | 0.06314  | 0.029605 |
| 0.071082 | 0.063815 | 0.078169 | 0.080987 | 0.059723 | 0.075805 | 0.076398 | 0.070485 | 0.069229 |
| 0.283041 | 0.248948 | 0.723341 | 0.588835 | 0.351319 | 0.360888 | 0.267216 | 0.588846 | 0.564544 |
| 0.014811 | 0.014584 | 0.019006 | 0.010641 | 0.009895 | 0.011832 | 0.012804 | 0.010101 | 0.013476 |
| 0.071254 | 0.236717 | 0.077964 | 0.329206 | 0.172779 | 0.23429  | 0.151119 | 0.245985 | 0.190479 |
| 0.045797 | 0.056305 | 0.048226 | 0.159242 | 0.061389 | 0.098387 | 0.053633 | 0.094525 | 0.056579 |
| 0.427297 | 0.437198 | 0.921526 | 0.612383 | 0.499762 | 0.514517 | 0.361138 | 0.722142 | 0.520838 |
| 0.074354 | 0.150591 | 0.076881 | 0.394549 | 0.140763 | 0.201455 | 0.04828  | 0.47638  | 0.193873 |
| 0.035373 | 0.043446 | 0.072518 | 0.097616 | 0.052476 | 0.062558 | 0.049669 | 0.074728 | 0.045373 |

| TCGA. AL. | TCGA. HE. | TCGA. DZ. | TCGA. Y8. | TCGA. A4. | TCGA. UZ. | TCGA. B1. | TCGA. SX. | TCGA. Y8. |
|-----------|-----------|-----------|-----------|-----------|-----------|-----------|-----------|-----------|
| 0.400981  | 0.041266  | 0.051786  | 0.041334  | 0.079106  | 0.03346   | 0.049594  | 0.061547  | 0.03108   |
| 0         | 0.040922  | 0.030402  | 0.050417  | 0.107216  | 0.065182  | 0.060113  | 0.076178  | 0.275738  |
| 0.933306  | 0.832626  | 0.939042  | 0.824363  | 0.95509   | 0.925971  | 0.921233  | 0.931405  | 0.800328  |
| 0.045589  | 0.039694  | 0.021393  | 0.017682  | 0.027549  | 0.017157  | 0.021275  | 0.02277   | 0.017471  |
| 0         | 0         | 0         | 0         | 0         | 0         | 0         | 0         | 0         |
| 0.362608  | 0.348505  | 0.244188  | 0.442412  | 0.231744  | 0.471138  | 0.248548  | 0.223262  | 0.082121  |
| 0.067768  | 0.027495  | 0.149959  | 0.039657  | 0.057699  | 0.032563  | 0.027119  | 0.430974  | 0.075781  |
| 0.016359  | 0.014561  | 0.016338  | 0.012856  | 0.015597  | 0.012364  | 0.013513  | 0.016849  | 0.012975  |
| 0.392767  | 0.121497  | 0.042627  | 0.120395  | 0.191546  | 0.080571  | 0.140748  | 0.15057   | 0         |
| 0.225249  | 0.17831   | 0.094615  | 0.086811  | 0.208626  | 0.128161  | 0.082046  | 0.062862  | 0.070052  |
| 0.083641  | 0.128267  | 0.069053  | 0.055599  | 0.110107  | 0.050783  | 0.058566  | 0.182397  | 0.083198  |
| 0         | 0.045078  | 0.028587  | 0.035865  | 0.061959  | 0.037343  | 0.041724  | 0.058495  | 0.163216  |
| 0.075199  | 0.045389  | 0.041925  | 0.064922  | 0.061277  | 0.038523  | 0.048501  | 0.057406  | 0.03798   |
| 0         | 0         | 0         | 0         | 0         | 0         | 0         | 0         | 0         |
| 0         | 0         | 0         | 0         | 0         | 0         | 0         | 0         | 0         |
| 0         | 0         | 0         | 0         | 0         | 0         | 0         | 0         | 0         |
| 0.056045  | 0.046791  | 0.058523  | 0.047118  | 0.081165  | 0.040244  | 0.031962  | 0.066504  | 0.037818  |
| 0         | 0.054795  | 0.035057  | 0.056193  | 0.073443  | 0.041737  | 0.0568    | 0.054561  | 0.083779  |
| 0.037726  | 0.031647  | 0.029662  | 0.02049   | 0.044066  | 0.024891  | 0.025591  | 0.041432  | 0.028765  |
| 0         | 0.18786   | 0.049809  | 0.151284  | 0.402123  | 0         | 0.27107   | 0.229155  | 0         |
| 0.163274  | 0.076261  | 0.228091  | 0.125557  | 0.095056  | 0.048435  | 0.043538  | 0.448421  | 0.102319  |
| 0.769039  | 0.027389  | 0.065782  | 0.026402  | 0.06264   | 0.028534  | 0.363267  | 0.052411  | 0.03622   |
| 0.148539  | 0.291063  | 0.086847  | 0.177786  | 0.329901  | 0.242421  | 0.158923  | 0.19251   | 0.184792  |
| 0.106673  | 0.096423  | 0.114133  | 0.078278  | 0.111577  | 0.081398  | 0.083678  | 0.08908   | 0.067273  |
| 0.066517  | 0.126591  | 0.078196  | 0.044938  | 0.106364  | 0.047573  | 0.061228  | 0.215438  | 0.096112  |
| 0.772561  | 0.298512  | 0.40637   | 0.607021  | 0.36954   | 0.402025  | 0.491876  | 0.846924  | 0.229987  |
| 0.186626  | 0.181796  | 0.073511  | 0.220883  | 0.195457  | 0.23002   | 0.175106  | 0.116564  | 0.08383   |
| 0.694006  | 0.090705  | 0.391993  | 0.045537  | 0.043734  | 0.073335  | 0.153572  | 0.178059  | 0.011811  |
| 0.331868  | 0.031655  | 0.077567  | 0.03411   | 0.048825  | 0.036466  | 0.043272  | 0.054052  | 0.043968  |
| 0.483968  | 0.221226  | 0.230047  | 0.386295  | 0.215082  | 0.189015  | 0.149016  | 0.632077  | 0.107368  |
| 0.796847  | 0.111121  | 0.767021  | 0.072029  | 0.240144  | 0.172655  | 0.47239   | 0.517575  | 0.019637  |
| 0.016353  | 0.021628  | 0.015619  | 0.011749  | 0.016662  | 0.012335  | 0.015235  | 0.018997  | 0.011702  |
| 0.090047  | 0.072315  | 0.125076  | 0.073358  | 0.097434  | 0.078492  | 0.093794  | 0.144588  | 0.210204  |
| 0.249554  | 0.349951  | 0.402118  | 0.369615  | 0.227103  | 0.108247  | 0.100562  | 0.732955  | 0.396195  |
| 0.246471  | 0.022054  | 0.039361  | 0.028214  | 0.042254  | 0.028464  | 0.022509  | 0.035555  | 0.043358  |
| 0         | 0         | 0         | 0         | 0         | 0         | 0         | 0         | 0         |
| 0.059956  | 0.057444  | 0.047606  | 0.053101  | 0.07242   | 0.054368  | 0.046713  | 0.051872  | 0.049138  |
| 0.401758  | 0.399912  | 0.335167  | 0.512714  | 0.324066  | 0.525793  | 0.371077  | 0.275934  | 0.142612  |
| 0.063026  | 0.033585  | 0.053074  | 0.082329  | 0.03735   | 0.02797   | 0.032143  | 0.1305    | 0.02631   |
| 0.078747  | 0.081846  | 0.050633  | 0.071827  | 0.079355  | 0.053014  | 0.063352  | 0.064547  | 0.056832  |
| 0.842642  | 0.43706   | 0.850671  | 0.386258  | 0.376814  | 0.43902   | 0.506214  | 0.655104  | 0.219581  |
| 0.016701  | 0.014747  | 0.010753  | 0.014966  | 0.014997  | 0.009304  | 0.012545  | 0.016753  | 0.010816  |
| 0.185738  | 0.185952  | 0.068841  | 0.165949  | 0.251051  | 0.248037  | 0.197587  | 0.128405  | 0.134936  |
| 0.069829  | 0.067536  | 0.060716  | 0.063776  | 0.073616  | 0.056971  | 0.048448  | 0.048913  | 0.054892  |
| 0.887524  | 0.546704  | 0.885683  | 0.545788  | 0.503214  | 0.5537    | 0.501068  | 0.449602  | 0.305508  |
| 0.280423  | 0.148283  | 0.060116  | 0.203045  | 0.147295  | 0.197047  | 0.171266  | 0.095719  | 0.041001  |
| 0.079983  | 0.054156  | 0.069375  | 0.058432  | 0.075605  | 0.051352  | 0.037507  | 0.040553  | 0.025652  |

TCGA. F9. A TCGA. DZ. € TCGA. 2Z. A TCGA. IA. A TCGA. A4. £ TCGA. B9. A TCGA. F9. A TCGA. A4. 7 TCGA. BQ. £

|          |          |          |          |          |          |          |          |          |
|----------|----------|----------|----------|----------|----------|----------|----------|----------|
| 0.065244 | 0.056667 | 0.04666  | 0.047378 | 0.040143 | 0.166009 | 0.098513 | 0.046774 | 0.05364  |
| 0        | 0.045142 | 0.045385 | 0.07214  | 0.133965 | 0.234933 | 0        | 0        | 0        |
| 0.836342 | 0.923085 | 0.592957 | 0.665477 | 0.436289 | 0.904352 | 0.939541 | 0.689164 | 0.960239 |
| 0.024648 | 0.027183 | 0.020122 | 0.028597 | 0.021128 | 0.023419 | 0.03014  | 0.031361 | 0.020496 |
| 0        | 0        | 0        | 0        | 0        | 0        | 0        | 0        | 0        |
| 0.200085 | 0.483242 | 0.261781 | 0.497635 | 0.129606 | 0.118114 | 0.158239 | 0.162026 | 0.096232 |
| 0.060166 | 0.110121 | 0.053827 | 0.034515 | 0.142675 | 0.245965 | 0.086434 | 0.030129 | 0.15641  |
| 0.016601 | 0.012352 | 0.014607 | 0.015729 | 0.017881 | 0.016594 | 0.019103 | 0.012434 | 0.016546 |
| 0        | 0.066609 | 0.159652 | 0.067731 | 0.217742 | 0.317366 | 0        | 0        | 0        |
| 0.069537 | 0.234288 | 0.129678 | 0.131833 | 0.120519 | 0.166011 | 0.1625   | 0.144294 | 0.13842  |
| 0.278213 | 0.13848  | 0.056417 | 0.090586 | 0.152937 | 0.200343 | 0.07596  | 0.079592 | 0.178024 |
| 0        | 0.030582 | 0.0615   | 0.035591 | 0.050429 | 0.126695 | 0        | 0        | 0        |
| 0.077664 | 0.067443 | 0.046352 | 0.053189 | 0.041135 | 0.040289 | 0.062431 | 0.046106 | 0.0411   |
| 0        | 0        | 0        | 0        | 0        | 0        | 0        | 0        | 0        |
| 0        | 0        | 0        | 0        | 0        | 0        | 0        | 0        | 0        |
| 0        | 0        | 0        | 0        | 0        | 0        | 0        | 0        | 0        |
| 0.047161 | 0.122192 | 0.086403 | 0.107148 | 0.036612 | 0.099711 | 0.048595 | 0.055812 | 0.050249 |
| 0        | 0.054641 | 0.069573 | 0.059722 | 0.060928 | 0.081905 | 0        | 0        | 0        |
| 0.043132 | 0.039051 | 0.16016  | 0.042811 | 0.040557 | 0.33818  | 0.051012 | 0.036887 | 0.045329 |
| 0        | 0.092262 | 0.292855 | 0.138202 | 0.323746 | 0        | 0        | 0        | 0        |
| 0.106692 | 0.156393 | 0.092176 | 0.0754   | 0.189409 | 0.356091 | 0.153076 | 0.103837 | 0.227899 |
| 0.31072  | 0.04237  | 0.036977 | 0.029467 | 0.028398 | 0.148723 | 0.133968 | 0.04094  | 0.030366 |
| 0.178165 | 0.320254 | 0.371325 | 0.259825 | 0.100411 | 0.377123 | 0.273875 | 0.087844 | 0.134798 |
| 0.085185 | 0.126826 | 0.084641 | 0.092884 | 0.103338 | 0.088491 | 0.094841 | 0.10975  | 0.101031 |
| 0.330116 | 0.118957 | 0.051649 | 0.106338 | 0.16973  | 0.175762 | 0.081571 | 0.099079 | 0.176153 |
| 0.202562 | 0.453026 | 0.469318 | 0.403059 | 0.4547   | 0.80345  | 0.434756 | 0.138696 | 0.694591 |
| 0.187292 | 0.299007 | 0.20248  | 0.226375 | 0.132802 | 0.24516  | 0.172969 | 0.100424 | 0.29277  |
| 0.567642 | 0.155333 | 0.018269 | 0.070903 | 0.029436 | 0.693358 | 0.041565 | 0.018769 | 0.661797 |
| 0.054578 | 0.043902 | 0.033788 | 0.044695 | 0.046308 | 0.156942 | 0.045852 | 0.054132 | 0.047762 |
| 0.234808 | 0.333622 | 0.27482  | 0.340467 | 0.154588 | 0.531422 | 0.275395 | 0.151825 | 0.420639 |
| 0.600486 | 0.303094 | 0.026507 | 0.100434 | 0.26463  | 0.744223 | 0.038149 | 0.138262 | 0.747722 |
| 0.017386 | 0.017549 | 0.24073  | 0.015478 | 0.015222 | 0.46349  | 0.018007 | 0.014739 | 0.016588 |
| 0.150905 | 0.109093 | 0.095752 | 0.118893 | 0.066539 | 0.294758 | 0.162034 | 0.124417 | 0.118843 |
| 0.136414 | 0.267971 | 0.476699 | 0.061588 | 0.697065 | 0.733559 | 0.542454 | 0.117334 | 0.327213 |
| 0.055336 | 0.030938 | 0.027839 | 0.036355 | 0.026752 | 0.105467 | 0.061147 | 0.030847 | 0.029638 |
| 0        | 0        | 0        | 0        | 0        | 0        | 0        | 0        | 0        |
| 0.053557 | 0.071932 | 0.136748 | 0.059408 | 0.054116 | 0.38347  | 0.038728 | 0.050723 | 0.064362 |
| 0.262974 | 0.516599 | 0.316136 | 0.59017  | 0.194052 | 0.203483 | 0.240805 | 0.246965 | 0.163302 |
| 0.04851  | 0.118722 | 0.034073 | 0.047319 | 0.037451 | 0.242536 | 0.069027 | 0.042244 | 0.124175 |
| 0.069018 | 0.065241 | 0.115614 | 0.072995 | 0.079954 | 0.368879 | 0.072303 | 0.068066 | 0.074676 |
| 0.708375 | 0.622424 | 0.327439 | 0.470448 | 0.2467   | 0.741009 | 0.253386 | 0.270223 | 0.934735 |
| 0.015615 | 0.01082  | 0.012769 | 0.013115 | 0.01256  | 0.014459 | 0.015176 | 0.013002 | 0.016346 |
| 0.177132 | 0.373666 | 0.270882 | 0.175806 | 0.160173 | 0.382808 | 0.153436 | 0.156058 | 0.471841 |
| 0.062174 | 0.124902 | 0.062629 | 0.110332 | 0.064463 | 0.126217 | 0.07564  | 0.067063 | 0.074431 |
| 0.681704 | 0.603814 | 0.50352  | 0.590758 | 0.41498  | 0.81499  | 0.414134 | 0.38263  | 0.946206 |
| 0.093449 | 0.25897  | 0.117275 | 0.240071 | 0.077427 | 0.035134 | 0.105786 | 0.099099 | 0.06095  |
| 0.056337 | 0.072717 | 0.054096 | 0.074348 | 0.056944 | 0.03261  | 0.055498 | 0.055978 | 0.052534 |

TCGA. 2Z. A TCGA. IZ. A TCGA. DW. 7 TCGA. G7. € TCGA. A4. A TCGA. 5P. A TCGA. BQ. 5 TCGA. UZ. A TCGA. 4A. A

|          |          |          |          |          |          |          |          |          |
|----------|----------|----------|----------|----------|----------|----------|----------|----------|
| 0.044142 | 0.051125 | 0.036462 | 0.055048 | 0.060986 | 0.09241  | 0.306714 | 0.058483 | 0.049474 |
| 0.053962 | 0.082019 | 0.066206 | 0.072976 | 0.042908 | 0        | 0.036464 | 0.287772 | 0        |
| 0.931283 | 0.912931 | 0.751563 | 0.819288 | 0.926647 | 0.613638 | 0.924563 | 0.209758 | 0.43637  |
| 0.020864 | 0.018945 | 0.025676 | 0.025022 | 0.036416 | 0.022719 | 0.05177  | 0.018377 | 0.014924 |
| 0        | 0        | 0        | 0        | 0        | 0        | 0        | 0        | 0        |
| 0.336705 | 0.201197 | 0.243682 | 0.269665 | 0.422087 | 0.443873 | 0.242749 | 0.100959 | 0.11044  |
| 0.043478 | 0.027637 | 0.094313 | 0.431522 | 0.035004 | 0.839112 | 0.169048 | 0.035131 | 0.045492 |
| 0.012567 | 0.014561 | 0.015615 | 0.014853 | 0.012323 | 0.014326 | 0.02231  | 0.015523 | 0.01254  |
| 0.122744 | 0.248106 | 0.1259   | 0.109323 | 0.122697 | 0        | 0.051529 | 0.327806 | 0        |
| 0.111677 | 0.092881 | 0.153974 | 0.144749 | 0.211393 | 0.185283 | 0.131724 | 0.065697 | 0.089191 |
| 0.046868 | 0.085722 | 0.085373 | 0.068166 | 0.06386  | 0.296466 | 0.127122 | 0.065199 | 0.079769 |
| 0.045828 | 0.079644 | 0.046695 | 0.045415 | 0.028715 | 0        | 0.028144 | 0.237662 | 0        |
| 0.042591 | 0.032697 | 0.047939 | 0.044588 | 0.069722 | 0.04904  | 0.068148 | 0.046137 | 0.043641 |
| 0        | 0        | 0        | 0        | 0        | 0        | 0        | 0        | 0        |
| 0        | 0        | 0        | 0        | 0        | 0        | 0        | 0        | 0        |
| 0        | 0        | 0        | 0        | 0        | 0        | 0        | 0        | 0        |
| 0.051141 | 0.045024 | 0.097046 | 0.06467  | 0.103247 | 0.218027 | 0.08119  | 0.030118 | 0.020848 |
| 0.037045 | 0.085974 | 0.055095 | 0.058056 | 0.048531 | 0        | 0.079719 | 0.140694 | 0        |
| 0.028471 | 0.024829 | 0.057892 | 0.042191 | 0.040199 | 0.040496 | 0.096353 | 0.035978 | 0.024586 |
| 0.202091 | 0.400523 | 0.253398 | 0.275749 | 0.103352 | 0        | 0.05587  | 0        | 0        |
| 0.114492 | 0.032438 | 0.152613 | 0.452931 | 0.074814 | 0.464566 | 0.2254   | 0.139993 | 0.072509 |
| 0.044743 | 0.403519 | 0.038049 | 0.030499 | 0.084878 | 0.118097 | 0.401136 | 0.110179 | 0.157432 |
| 0.186106 | 0.072579 | 0.160804 | 0.223226 | 0.259018 | 0.753753 | 0.095867 | 0.116391 | 0.127389 |
| 0.107908 | 0.079936 | 0.090289 | 0.112858 | 0.084012 | 0.085174 | 0.12244  | 0.090197 | 0.085882 |
| 0.050326 | 0.092967 | 0.071697 | 0.062635 | 0.087478 | 0.262966 | 0.138188 | 0.05449  | 0.088587 |
| 0.545653 | 0.16051  | 0.423686 | 0.657386 | 0.30141  | 0.812835 | 0.654965 | 0.124806 | 0.447561 |
| 0.179627 | 0.117988 | 0.198035 | 0.220228 | 0.321715 | 0.545961 | 0.153663 | 0.080814 | 0.137174 |
| 0.087498 | 0.02733  | 0.071402 | 0.023619 | 0.30803  | 0.034586 | 0.664233 | 0.016837 | 0.010428 |
| 0.036533 | 0.041372 | 0.052718 | 0.04085  | 0.04225  | 0.048641 | 0.234421 | 0.039658 | 0.045222 |
| 0.283224 | 0.119668 | 0.243282 | 0.316988 | 0.185351 | 0.793271 | 0.233188 | 0.056364 | 0.121031 |
| 0.189953 | 0.290355 | 0.041514 | 0.069838 | 0.524194 | 0.034771 | 0.696447 | 0.017923 | 0.012265 |
| 0.019261 | 0.018323 | 0.015358 | 0.03063  | 0.023767 | 0.032828 | 0.101825 | 0.016052 | 0.012706 |
| 0.116154 | 0.069778 | 0.153331 | 0.11415  | 0.097373 | 0.20225  | 0.075743 | 0.076279 | 0.28209  |
| 0.294162 | 0.073647 | 0.589977 | 0.765597 | 0.05577  | 0.894663 | 0.219379 | 0.614123 | 0.199014 |
| 0.03243  | 0.029204 | 0.03175  | 0.031385 | 0.030611 | 0.030932 | 0.216642 | 0.028096 | 0.036832 |
| 0        | 0        | 0        | 0        | 0        | 0        | 0        | 0        | 0        |
| 0.059076 | 0.062308 | 0.066927 | 0.058223 | 0.06978  | 0.060131 | 0.128008 | 0.052995 | 0.044174 |
| 0.456611 | 0.274861 | 0.265833 | 0.346948 | 0.510868 | 0.820088 | 0.369392 | 0.169864 | 0.211002 |
| 0.040635 | 0.038704 | 0.044139 | 0.047539 | 0.046425 | 0.531069 | 0.068588 | 0.036838 | 0.029215 |
| 0.060978 | 0.067505 | 0.085349 | 0.069226 | 0.077132 | 0.076208 | 0.123041 | 0.059355 | 0.062812 |
| 0.48481  | 0.412999 | 0.418689 | 0.475044 | 0.597735 | 0.321155 | 0.743259 | 0.177153 | 0.127746 |
| 0.010042 | 0.015724 | 0.014752 | 0.012279 | 0.013414 | 0.015538 | 0.019009 | 0.014377 | 0.010652 |
| 0.164496 | 0.11931  | 0.220124 | 0.272893 | 0.342722 | 0.374773 | 0.245357 | 0.053833 | 0.351391 |
| 0.050867 | 0.04483  | 0.061765 | 0.066685 | 0.110639 | 0.314185 | 0.09274  | 0.035445 | 0.038203 |
| 0.572194 | 0.456274 | 0.525002 | 0.52248  | 0.600685 | 0.432697 | 0.7787   | 0.387293 | 0.331865 |
| 0.15751  | 0.063631 | 0.153099 | 0.135742 | 0.313924 | 0.348952 | 0.1136   | 0.046233 | 0.064308 |
| 0.056933 | 0.037389 | 0.061092 | 0.081724 | 0.062769 | 0.055909 | 0.065672 | 0.039278 | 0.027906 |

TCGA. B3. A TCGA. DW. 7 TCGA. F9. A TCGA. BQ. 5 TCGA. SX. A TCGA. HE. 7 TCGA. DZ. 6 TCGA. A4. 8 TCGA. P4. A

|          |          |          |          |          |          |          |          |          |
|----------|----------|----------|----------|----------|----------|----------|----------|----------|
| 0.149914 | 0.074138 | 0.204815 | 0.053612 | 0.069509 | 0.043348 | 0.042283 | 0.042646 | 0.117401 |
| 0.119029 | 0.080411 | 0        | 0        | 0        | 0.032022 | 0.030092 | 0.09403  | 0.091668 |
| 0.938537 | 0.771933 | 0.882959 | 0.93613  | 0.940603 | 0.927821 | 0.91435  | 0.936151 | 0.893971 |
| 0.038673 | 0.026981 | 0.128496 | 0.019012 | 0.02189  | 0.032193 | 0.030386 | 0.02158  | 0.018933 |
| 0        | 0        | 0        | 0        | 0        | 0        | 0        | 0        | 0        |
| 0.154405 | 0.151696 | 0.50697  | 0.629436 | 0.347094 | 0.433139 | 0.268931 | 0.151418 | 0.14764  |
| 0.504646 | 0.203963 | 0.04894  | 0.099525 | 0.042958 | 0.064535 | 0.035048 | 0.148617 | 0.03777  |
| 0.015954 | 0.01199  | 0.014651 | 0.014939 | 0.013754 | 0.012012 | 0.011906 | 0.016901 | 0.013792 |
| 0.300487 | 0.225021 | 0        | 0        | 0        | 0.070303 | 0.046202 | 0.25695  | 0.209029 |
| 0.157024 | 0.136467 | 0.156438 | 0.22836  | 0.13961  | 0.154116 | 0.164532 | 0.162241 | 0.052077 |
| 0.086553 | 0.211529 | 0.100099 | 0.064306 | 0.045813 | 0.077868 | 0.080654 | 0.078473 | 0.082352 |
| 0.085901 | 0.067106 | 0        | 0        | 0        | 0.036487 | 0.029587 | 0.061066 | 0.06447  |
| 0.068877 | 0.044683 | 0.056839 | 0.086561 | 0.053595 | 0.060959 | 0.042506 | 0.052521 | 0.04107  |
| 0        | 0        | 0        | 0        | 0        | 0        | 0        | 0        | 0        |
| 0        | 0        | 0        | 0        | 0        | 0        | 0        | 0        | 0        |
| 0        | 0        | 0        | 0        | 0        | 0        | 0        | 0        | 0        |
| 0.060163 | 0.044039 | 0.128033 | 0.156486 | 0.070092 | 0.11671  | 0.072857 | 0.042415 | 0.042532 |
| 0.065224 | 0.055583 | 0        | 0        | 0        | 0.035789 | 0.04452  | 0.106027 | 0.059165 |
| 0.044979 | 0.029611 | 0.042708 | 0.040163 | 0.035753 | 0.045727 | 0.036211 | 0.037383 | 0.032914 |
| 0.367506 | 0.325055 | 0        | 0        | 0        | 0.07594  | 0.049025 | 0.380217 | 0.428055 |
| 0.524642 | 0.340565 | 0.120296 | 0.158405 | 0.100197 | 0.108528 | 0.059736 | 0.1881   | 0.061062 |
| 0.068788 | 0.057465 | 0.219914 | 0.024968 | 0.072594 | 0.024696 | 0.027173 | 0.069027 | 0.055497 |
| 0.203102 | 0.077352 | 0.181835 | 0.311365 | 0.2111   | 0.220135 | 0.067341 | 0.244533 | 0.239609 |
| 0.118032 | 0.073981 | 0.080549 | 0.113466 | 0.085116 | 0.116323 | 0.110005 | 0.112551 | 0.080032 |
| 0.111474 | 0.189898 | 0.093082 | 0.06253  | 0.071518 | 0.071802 | 0.075127 | 0.078537 | 0.097464 |
| 0.603822 | 0.62378  | 0.547486 | 0.535429 | 0.655115 | 0.486963 | 0.228128 | 0.502609 | 0.845634 |
| 0.137986 | 0.149739 | 0.237563 | 0.398793 | 0.180018 | 0.233776 | 0.136795 | 0.278079 | 0.112883 |
| 0.096423 | 0.018283 | 0.480216 | 0.149202 | 0.155971 | 0.112602 | 0.135925 | 0.071554 | 0.278068 |
| 0.065409 | 0.038884 | 0.189238 | 0.043696 | 0.035979 | 0.042483 | 0.047042 | 0.033882 | 0.052564 |
| 0.262378 | 0.237348 | 0.201283 | 0.346124 | 0.326615 | 0.335319 | 0.178603 | 0.282949 | 0.441369 |
| 0.167966 | 0.026781 | 0.530737 | 0.299015 | 0.403321 | 0.215168 | 0.075948 | 0.102718 | 0.719863 |
| 0.020553 | 0.014464 | 0.017604 | 0.013615 | 0.01391  | 0.015695 | 0.022009 | 0.02303  | 0.013525 |
| 0.099153 | 0.107468 | 0.205615 | 0.143282 | 0.10272  | 0.129171 | 0.086065 | 0.096659 | 0.094418 |
| 0.800783 | 0.405354 | 0.087722 | 0.164877 | 0.374137 | 0.229787 | 0.063627 | 0.362767 | 0.316385 |
| 0.090753 | 0.028142 | 0.08923  | 0.036618 | 0.032643 | 0.030956 | 0.030052 | 0.02537  | 0.024241 |
| 0        | 0        | 0        | 0        | 0        | 0        | 0        | 0        | 0        |
| 0.056471 | 0.055385 | 0.074938 | 0.049206 | 0.052444 | 0.063199 | 0.055074 | 0.082451 | 0.037197 |
| 0.205212 | 0.201099 | 0.701768 | 0.668267 | 0.439966 | 0.478059 | 0.309605 | 0.155454 | 0.244404 |
| 0.042692 | 0.029856 | 0.03583  | 0.097821 | 0.035747 | 0.045253 | 0.04528  | 0.026974 | 0.0237   |
| 0.078689 | 0.065128 | 0.090126 | 0.072114 | 0.072059 | 0.07969  | 0.087262 | 0.07267  | 0.064375 |
| 0.546432 | 0.585067 | 0.715458 | 0.615506 | 0.677744 | 0.549176 | 0.326928 | 0.463873 | 0.719534 |
| 0.015911 | 0.010597 | 0.012884 | 0.012779 | 0.017162 | 0.01493  | 0.011058 | 0.019301 | 0.012079 |
| 0.121602 | 0.132155 | 0.290755 | 0.392595 | 0.218137 | 0.233743 | 0.222285 | 0.41519  | 0.226948 |
| 0.057123 | 0.047219 | 0.116862 | 0.173356 | 0.045232 | 0.117434 | 0.068507 | 0.067566 | 0.033799 |
| 0.464675 | 0.449764 | 0.800193 | 0.618583 | 0.527055 | 0.609253 | 0.451587 | 0.44691  | 0.486039 |
| 0.063931 | 0.061582 | 0.191259 | 0.429457 | 0.154776 | 0.206457 | 0.131797 | 0.075786 | 0.041667 |
| 0.047945 | 0.046728 | 0.046417 | 0.104273 | 0.060471 | 0.096501 | 0.06235  | 0.064946 | 0.033615 |

TCGA. DW. 7TCGA. P4. 1TCGA. BQ. 7TCGA. UZ. 1TCGA. P4. 1TCGA. 5P. 1TCGA. BQ. 5TCGA. MH. 1TCGA. G7. 6

|          |          |          |          |          |          |          |          |          |
|----------|----------|----------|----------|----------|----------|----------|----------|----------|
| 0.038178 | 0.158485 | 0.070375 | 0.087228 | 0.0576   | 0.040459 | 0.070184 | 0.256923 | 0.06431  |
| 0.052869 | 0.115972 | 0.138885 | 0        | 0.305855 | 0        | 0        | 0.059642 | 0.311161 |
| 0.915633 | 0.927079 | 0.957288 | 0.766416 | 0.923781 | 0.472741 | 0.717332 | 0.941724 | 0.957095 |
| 0.025868 | 0.106701 | 0.020067 | 0.014914 | 0.036074 | 0.026774 | 0.031911 | 0.02886  | 0.015178 |
| 0        | 0        | 0        | 0        | 0        | 0        | 0        | 0        | 0        |
| 0.320733 | 0.291738 | 0.136068 | 0.048999 | 0.147476 | 0.236984 | 0.334386 | 0.247118 | 0.071987 |
| 0.086508 | 0.032469 | 0.153396 | 0.543575 | 0.127676 | 0.06965  | 0.174904 | 0.315879 | 0.303104 |
| 0.01499  | 0.016677 | 0.01324  | 0.013831 | 0.017198 | 0.012676 | 0.012164 | 0.016812 | 0.01592  |
| 0.081833 | 0.285523 | 0.350644 | 0.382608 | 0.336197 | 0        | 0        | 0.176785 | 0.429435 |
| 0.177208 | 0.154817 | 0.169394 | 0.039807 | 0.185468 | 0.075643 | 0.142162 | 0.145405 | 0.107514 |
| 0.076084 | 0.088873 | 0.104975 | 0.032564 | 0.086143 | 0.058595 | 0.22415  | 0.073659 | 0.07904  |
| 0.035308 | 0.092938 | 0.071559 | 0        | 0.112583 | 0        | 0        | 0.055616 | 0.307836 |
| 0.052329 | 0.066973 | 0.04307  | 0.035761 | 0.05856  | 0.044356 | 0.145551 | 0.055906 | 0.047773 |
| 0        | 0        | 0        | 0        | 0        | 0        | 0        | 0        | 0        |
| 0        | 0        | 0        | 0        | 0        | 0        | 0        | 0        | 0        |
| 0        | 0        | 0        | 0        | 0        | 0        | 0        | 0        | 0        |
| 0.055923 | 0.052814 | 0.039167 | 0.027393 | 0.039805 | 0.041585 | 0.048513 | 0.048294 | 0.047664 |
| 0.049852 | 0.079258 | 0.078538 | 0.248521 | 0.097213 | 0.474928 | 0        | 0.070617 | 0.143326 |
| 0.034133 | 0.035344 | 0.032268 | 0.030113 | 0.039282 | 0.037136 | 0.032157 | 0.031139 | 0.030689 |
| 0.171348 | 0.399624 | 0.469394 | 0        | 0.444145 | 0        | 0        | 0.333845 | 0.418587 |
| 0.169417 | 0.080853 | 0.170494 | 0.57284  | 0.208988 | 0.089425 | 0.316497 | 0.341512 | 0.349139 |
| 0.033013 | 0.430658 | 0.030814 | 0.117231 | 0.049315 | 0.052408 | 0.129422 | 0.226518 | 0.313377 |
| 0.092747 | 0.11638  | 0.111241 | 0.078491 | 0.169701 | 0.101441 | 0.12485  | 0.120952 | 0.204321 |
| 0.080261 | 0.099466 | 0.089033 | 0.093926 | 0.094053 | 0.070016 | 0.110909 | 0.100228 | 0.10754  |
| 0.058792 | 0.084548 | 0.105424 | 0.050945 | 0.08087  | 0.060937 | 0.22426  | 0.080659 | 0.059414 |
| 0.522316 | 0.106664 | 0.660214 | 0.68803  | 0.629944 | 0.838136 | 0.683307 | 0.67737  | 0.469908 |
| 0.194554 | 0.145486 | 0.194066 | 0.051183 | 0.141046 | 0.104724 | 0.139279 | 0.147409 | 0.115654 |
| 0.053668 | 0.669531 | 0.86489  | 0.014918 | 0.257076 | 0.029782 | 0.021531 | 0.067138 | 0.411138 |
| 0.042063 | 0.140315 | 0.055514 | 0.0369   | 0.046563 | 0.047586 | 0.053006 | 0.150716 | 0.051949 |
| 0.281987 | 0.141655 | 0.37619  | 0.35301  | 0.416143 | 0.749974 | 0.626732 | 0.333572 | 0.414714 |
| 0.107207 | 0.712057 | 0.964015 | 0.045912 | 0.754204 | 0.027199 | 0.029969 | 0.243053 | 0.800423 |
| 0.014624 | 0.041692 | 0.021703 | 0.012817 | 0.017753 | 0.013272 | 0.014724 | 0.014716 | 0.017052 |
| 0.11357  | 0.076526 | 0.126387 | 0.098408 | 0.09483  | 0.117748 | 0.152052 | 0.080883 | 0.132837 |
| 0.527828 | 0.06481  | 0.193824 | 0.915125 | 0.342914 | 0.467656 | 0.564167 | 0.683397 | 0.809628 |
| 0.031366 | 0.103829 | 0.024899 | 0.029624 | 0.03027  | 0.028945 | 0.030866 | 0.106316 | 0.033628 |
| 0        | 0        | 0        | 0        | 0        | 0        | 0        | 0        | 0        |
| 0.061036 | 0.072987 | 0.073625 | 0.051667 | 0.067768 | 0.042136 | 0.068133 | 0.046187 | 0.044171 |
| 0.380838 | 0.386952 | 0.202677 | 0.069013 | 0.174773 | 0.277115 | 0.45358  | 0.305789 | 0.133575 |
| 0.048107 | 0.031783 | 0.033808 | 0.053826 | 0.038171 | 0.044736 | 0.062824 | 0.038121 | 0.036005 |
| 0.079759 | 0.100286 | 0.065257 | 0.052729 | 0.084202 | 0.072675 | 0.072687 | 0.063163 | 0.058899 |
| 0.398854 | 0.80943  | 0.930766 | 0.094694 | 0.647032 | 0.387438 | 0.253047 | 0.546276 | 0.747679 |
| 0.013624 | 0.014116 | 0.012315 | 0.015008 | 0.014046 | 0.012881 | 0.012696 | 0.014827 | 0.012201 |
| 0.281079 | 0.156641 | 0.325775 | 0.066901 | 0.20959  | 0.081613 | 0.170108 | 0.138269 | 0.105359 |
| 0.071979 | 0.062388 | 0.05643  | 0.025548 | 0.055431 | 0.043665 | 0.090256 | 0.045353 | 0.070672 |
| 0.541222 | 0.808134 | 0.95521  | 0.172381 | 0.509227 | 0.466954 | 0.409278 | 0.534454 | 0.608143 |
| 0.237451 | 0.088316 | 0.098104 | 0.034512 | 0.076272 | 0.064012 | 0.179581 | 0.183126 | 0.067393 |
| 0.063285 | 0.055187 | 0.063169 | 0.03367  | 0.041525 | 0.054103 | 0.0935   | 0.04504  | 0.055241 |

| TCGA.DW. | 7TCGA.5P. | TCGA.MH. | TCGA.SX. | TCGA.B1. | TCGA.BQ. | 5TCGA.P4. | TCGA.2Z. | TCGA.B1. | TCGA.B1. |
|----------|-----------|----------|----------|----------|----------|-----------|----------|----------|----------|
| 0.060999 | 0.047403  | 0.473884 | 0.080695 | 0.042569 | 0.040613 | 0.046351  | 0.070375 | 0.050324 |          |
| 0.047882 | 0.203898  | 0.040951 | 0        | 0        | 0.044545 | 0.254413  | 0        | 0.039123 |          |
| 0.781263 | 0.934269  | 0.939227 | 0.947607 | 0.926584 | 0.922285 | 0.674304  | 0.929614 | 0.76135  |          |
| 0.030125 | 0.020484  | 0.018137 | 0.023491 | 0.019553 | 0.029432 | 0.02184   | 0.033922 | 0.303562 |          |
| 0        | 0         | 0        | 0        | 0        | 0        | 0         | 0        | 0        |          |
| 0.340965 | 0.141962  | 0.899059 | 0.083462 | 0.342118 | 0.5111   | 0.100365  | 0.273818 | 0.313914 |          |
| 0.062956 | 0.029293  | 0.483221 | 0.081605 | 0.410948 | 0.076227 | 0.070013  | 0.054205 | 0.388424 |          |
| 0.013866 | 0.012501  | 0.013132 | 0.014353 | 0.011468 | 0.019847 | 0.013355  | 0.012024 | 0.43174  |          |
| 0.083252 | 0.264171  | 0.065288 | 0        | 0        | 0.080255 | 0.281939  | 0        | 0.11492  |          |
| 0.106687 | 0.141952  | 0.162847 | 0.08632  | 0.100153 | 0.248188 | 0.103555  | 0.12391  | 0.236448 |          |
| 0.086811 | 0.068375  | 0.200951 | 0.079911 | 0.076525 | 0.355271 | 0.050661  | 0.124551 | 0.211203 |          |
| 0.050481 | 0.178784  | 0.026749 | 0        | 0        | 0.032179 | 0.16166   | 0        | 0.036649 |          |
| 0.054126 | 0.045975  | 0.082944 | 0.037238 | 0.044547 | 0.100457 | 0.040451  | 0.071508 | 0.070977 |          |
| 0        | 0         | 0        | 0        | 0        | 0        | 0         | 0        | 0        |          |
| 0        | 0         | 0        | 0        | 0        | 0        | 0         | 0        | 0        |          |
| 0        | 0         | 0        | 0        | 0        | 0        | 0         | 0        | 0        |          |
| 0.05562  | 0.032242  | 0.237696 | 0.068586 | 0.042366 | 0.163658 | 0.045232  | 0.079068 | 0.165675 |          |
| 0.056524 | 0.099084  | 0.039428 | 0        | 0        | 0.036277 | 0.0832    | 0        | 0.06732  |          |
| 0.029471 | 0.027267  | 0.038669 | 0.048106 | 0.027461 | 0.050638 | 0.029788  | 0.032941 | 0.298259 |          |
| 0.173662 | 0         | 0.05151  | 0        | 0        | 0.312813 | 0         | 0        | 0.167223 |          |
| 0.121005 | 0.079996  | 0.411673 | 0.204733 | 0.555591 | 0.142555 | 0.083763  | 0.315706 | 0.465168 |          |
| 0.043209 | 0.034981  | 0.210085 | 0.052995 | 0.033014 | 0.037936 | 0.030032  | 0.180989 | 0.024955 |          |
| 0.154674 | 0.095998  | 0.774563 | 0.229973 | 0.139455 | 0.154432 | 0.06891   | 0.156109 | 0.371468 |          |
| 0.092862 | 0.087292  | 0.082028 | 0.063653 | 0.101715 | 0.094427 | 0.084753  | 0.078585 | 0.391998 |          |
| 0.07016  | 0.057362  | 0.202007 | 0.083796 | 0.084297 | 0.258321 | 0.047978  | 0.121745 | 0.202019 |          |
| 0.226303 | 0.491885  | 0.806049 | 0.111567 | 0.641265 | 0.782286 | 0.642713  | 0.810454 | 0.730227 |          |
| 0.165509 | 0.07883   | 0.433612 | 0.127736 | 0.175772 | 0.313098 | 0.100466  | 0.177201 | 0.27835  |          |
| 0.035352 | 0.037742  | 0.020918 | 0.038291 | 0.152333 | 0.617221 | 0.027685  | 0.587717 | 0.017633 |          |
| 0.043434 | 0.037148  | 0.459215 | 0.058359 | 0.039918 | 0.042939 | 0.036664  | 0.039857 | 0.05398  |          |
| 0.186575 | 0.275408  | 0.766742 | 0.103398 | 0.699295 | 0.461401 | 0.132396  | 0.697054 | 0.634529 |          |
| 0.048042 | 0.293725  | 0.021769 | 0.068787 | 0.550548 | 0.562606 | 0.031272  | 0.63786  | 0.039932 |          |
| 0.018489 | 0.015907  | 0.026452 | 0.013185 | 0.01667  | 0.029687 | 0.017347  | 0.012612 | 0.434977 |          |
| 0.099399 | 0.090768  | 0.420162 | 0.150027 | 0.076438 | 0.124122 | 0.101727  | 0.114287 | 0.265907 |          |
| 0.17846  | 0.198491  | 0.71966  | 0.596207 | 0.644795 | 0.169326 | 0.187689  | 0.113176 | 0.581799 |          |
| 0.030236 | 0.025336  | 0.401278 | 0.056655 | 0.035746 | 0.028097 | 0.026504  | 0.025817 | 0.029195 |          |
| 0        | 0         | 0        | 0        | 0        | 0        | 0         | 0        | 0        |          |
| 0.050196 | 0.051298  | 0.057591 | 0.073549 | 0.050784 | 0.100455 | 0.075296  | 0.065795 | 0.351706 |          |
| 0.382609 | 0.16385   | 0.947592 | 0.162139 | 0.408179 | 0.382056 | 0.194172  | 0.394825 | 0.371019 |          |
| 0.045346 | 0.025952  | 0.525037 | 0.050651 | 0.134143 | 0.099186 | 0.024147  | 0.044556 | 0.342214 |          |
| 0.068045 | 0.065572  | 0.070203 | 0.077808 | 0.065407 | 0.088382 | 0.08009   | 0.066479 | 0.320702 |          |
| 0.356128 | 0.363758  | 0.322084 | 0.846291 | 0.783495 | 0.733914 | 0.237312  | 0.770952 | 0.388065 |          |
| 0.01621  | 0.013075  | 0.012823 | 0.013456 | 0.011865 | 0.01462  | 0.013831  | 0.010315 | 0.290794 |          |
| 0.175879 | 0.084978  | 0.486933 | 0.18637  | 0.157216 | 0.24979  | 0.095588  | 0.155549 | 0.402629 |          |
| 0.046713 | 0.047416  | 0.232836 | 0.070329 | 0.054636 | 0.112163 | 0.055053  | 0.092623 | 0.156738 |          |
| 0.49574  | 0.389352  | 0.511851 | 0.270598 | 0.81804  | 0.667795 | 0.404354  | 0.768897 | 0.595018 |          |
| 0.209194 | 0.061157  | 0.113008 | 0.058419 | 0.144895 | 0.257265 | 0.033261  | 0.155981 | 0.179534 |          |
| 0.051304 | 0.048098  | 0.061579 | 0.028224 | 0.057401 | 0.062742 | 0.048656  | 0.06213  | 0.067494 |          |



TCGA. G7. A TCGA. UZ. A TCGA. GL. A TCGA. G7. A TCGA. KV. A TCGA. A4. 7 TCGA. DW. 5 TCGA. KV. A TCGA. BQ. 5

|          |          |          |          |          |          |          |          |          |
|----------|----------|----------|----------|----------|----------|----------|----------|----------|
| 0.061188 | 0.058051 | 0.093747 | 0.080762 | 0.091594 | 0.043912 | 0.218854 | 0.042695 | 0.093816 |
| 0.054683 | 0        | 0.087365 | 0.030601 | 0.164513 | 0.036739 | 0        | 0.040331 | 0.038643 |
| 0.838458 | 0.949459 | 0.946522 | 0.91741  | 0.948426 | 0.85788  | 0.281654 | 0.76425  | 0.817759 |
| 0.01954  | 0.036974 | 0.030308 | 0.013371 | 0.027451 | 0.036319 | 0.026181 | 0.021955 | 0.090114 |
| 0        | 0        | 0        | 0        | 0        | 0        | 0        | 0        | 0        |
| 0.208111 | 0.516668 | 0.291901 | 0.068408 | 0.13231  | 0.586107 | 0.142792 | 0.466511 | 0.703647 |
| 0.262162 | 0.088759 | 0.077667 | 0.080335 | 0.158918 | 0.081298 | 0.113606 | 0.089843 | 0.145288 |
| 0.014645 | 0.014533 | 0.013434 | 0.013163 | 0.016946 | 0.012349 | 0.012998 | 0.013094 | 0.019483 |
| 0.064262 | 0        | 0.155214 | 0.058733 | 0.22906  | 0.046741 | 0        | 0.080507 | 0.035232 |
| 0.02639  | 0.168803 | 0.164681 | 0.03683  | 0.158092 | 0.236891 | 0.071707 | 0.151764 | 0.156259 |
| 0.129402 | 0.175843 | 0.058722 | 0.04924  | 0.075687 | 0.153266 | 0.230943 | 0.194276 | 0.256997 |
| 0.04493  | 0        | 0.052919 | 0.024405 | 0.080104 | 0.031275 | 0        | 0.036013 | 0.033487 |
| 0.113466 | 0.102177 | 0.038676 | 0.029264 | 0.053368 | 0.106044 | 0.043891 | 0.064666 | 0.084312 |
| 0        | 0        | 0        | 0        | 0        | 0        | 0        | 0        | 0        |
| 0        | 0        | 0        | 0        | 0        | 0        | 0        | 0        | 0        |
| 0        | 0        | 0        | 0        | 0        | 0        | 0        | 0        | 0        |
| 0.046768 | 0.084569 | 0.040803 | 0.037718 | 0.069093 | 0.144685 | 0.046781 | 0.095868 | 0.114801 |
| 0.049502 | 0        | 0.06421  | 0.059953 | 0.095158 | 0.041065 | 0        | 0.064997 | 0.071136 |
| 0.039837 | 0.055182 | 0.03839  | 0.039898 | 0.04466  | 0.043988 | 0.027663 | 0.029642 | 0.029324 |
| 0.042438 | 0        | 0.277917 | 0.089095 | 0.330602 | 0.062323 | 0        | 0.119639 | 0.063635 |
| 0.28253  | 0.113003 | 0.141925 | 0.361472 | 0.209692 | 0.157517 | 0.755414 | 0.161426 | 0.224769 |
| 0.071742 | 0.097617 | 0.357393 | 0.130372 | 0.307466 | 0.037662 | 0.192011 | 0.300354 | 0.042959 |
| 0.451535 | 0.195493 | 0.197056 | 0.068077 | 0.447079 | 0.243765 | 0.080696 | 0.169057 | 0.180346 |
| 0.087236 | 0.105891 | 0.098142 | 0.079048 | 0.104822 | 0.107829 | 0.097083 | 0.085019 | 0.119282 |
| 0.113956 | 0.158986 | 0.048677 | 0.055651 | 0.08739  | 0.150666 | 0.223422 | 0.196102 | 0.226798 |
| 0.753084 | 0.850242 | 0.698852 | 0.860664 | 0.609435 | 0.460967 | 0.673065 | 0.569971 | 0.319516 |
| 0.259756 | 0.199083 | 0.185567 | 0.076226 | 0.211654 | 0.307038 | 0.081881 | 0.236213 | 0.312182 |
| 0.020254 | 0.221753 | 0.446585 | 0.710948 | 0.189242 | 0.31059  | 0.01498  | 0.052254 | 0.375502 |
| 0.053093 | 0.066696 | 0.054146 | 0.058872 | 0.04971  | 0.047407 | 0.078947 | 0.037113 | 0.068462 |
| 0.464292 | 0.614989 | 0.275277 | 0.215571 | 0.281764 | 0.533355 | 0.837846 | 0.407437 | 0.357671 |
| 0.037944 | 0.350736 | 0.713521 | 0.879085 | 0.583883 | 0.312493 | 0.026388 | 0.114334 | 0.437102 |
| 0.01944  | 0.012579 | 0.01749  | 0.018832 | 0.019296 | 0.029065 | 0.013731 | 0.01636  | 0.017562 |
| 0.117695 | 0.112849 | 0.06455  | 0.064318 | 0.101834 | 0.124469 | 0.145361 | 0.071844 | 0.085248 |
| 0.844008 | 0.440815 | 0.627646 | 0.279852 | 0.675678 | 0.185796 | 0.659279 | 0.25734  | 0.258693 |
| 0.055293 | 0.047147 | 0.033793 | 0.058115 | 0.044471 | 0.036181 | 0.042477 | 0.029285 | 0.034844 |
| 0        | 0        | 0        | 0        | 0        | 0        | 0        | 0        | 0        |
| 0.045321 | 0.080201 | 0.05623  | 0.054493 | 0.069957 | 0.079765 | 0.07635  | 0.045102 | 0.068849 |
| 0.301557 | 0.644252 | 0.351725 | 0.120134 | 0.210855 | 0.58605  | 0.159524 | 0.551845 | 0.759037 |
| 0.043773 | 0.072745 | 0.037851 | 0.03563  | 0.062416 | 0.10081  | 0.062841 | 0.062536 | 0.082018 |
| 0.070633 | 0.086643 | 0.073281 | 0.058039 | 0.059962 | 0.102858 | 0.06108  | 0.062607 | 0.078205 |
| 0.309251 | 0.494771 | 0.714459 | 0.898401 | 0.616027 | 0.674377 | 0.108468 | 0.439641 | 0.621268 |
| 0.016264 | 0.018109 | 0.013367 | 0.01199  | 0.015901 | 0.011012 | 0.011306 | 0.01124  | 0.013806 |
| 0.201132 | 0.227045 | 0.158723 | 0.065046 | 0.260376 | 0.292652 | 0.113472 | 0.234408 | 0.275535 |
| 0.047597 | 0.07183  | 0.063655 | 0.022281 | 0.086771 | 0.157807 | 0.03989  | 0.070528 | 0.119809 |
| 0.505063 | 0.591292 | 0.569332 | 0.864887 | 0.478289 | 0.720475 | 0.291624 | 0.575031 | 0.661126 |
| 0.083862 | 0.180463 | 0.189856 | 0.037103 | 0.082945 | 0.363185 | 0.093073 | 0.248625 | 0.252367 |
| 0.05341  | 0.062768 | 0.058227 | 0.027294 | 0.038837 | 0.084787 | 0.035595 | 0.080792 | 0.081387 |

| TCGA. IZ. 8 | TCGA. BQ. 7 | TCGA. BQ. 5 | TCGA. B1. 5 | TCGA. A4. 1 | TCGA. UZ. 1 | TCGA. 2Z. 1 | TCGA. IZ. 1 | TCGA. UZ. 1 |
|-------------|-------------|-------------|-------------|-------------|-------------|-------------|-------------|-------------|
| 0.063546    | 0.220206    | 0.073982    | 0.031177    | 0.057376    | 0.195498    | 0.173106    | 0.049352    | 0.083279    |
| 0.249711    | 0.258732    | 0.046943    | 0.031432    | 0           | 0.031258    | 0           | 0.061496    | 0.053295    |
| 0.207577    | 0.949434    | 0.937512    | 0.921567    | 0.956238    | 0.914205    | 0.948729    | 0.935742    | 0.806132    |
| 0.025541    | 0.033647    | 0.019085    | 0.05201     | 0.013872    | 0.022169    | 0.031572    | 0.034945    | 0.022364    |
| 0           | 0           | 0           | 0           | 0           | 0           | 0           | 0           | 0           |
| 0.064902    | 0.067572    | 0.411768    | 0.670756    | 0.180134    | 0.091683    | 0.04551     | 0.37306     | 0.384833    |
| 0.112201    | 0.122917    | 0.034772    | 0.076157    | 0.148441    | 0.369862    | 0.037641    | 0.033993    | 0.13287     |
| 0.014093    | 0.015992    | 0.015271    | 0.022822    | 0.01408     | 0.018124    | 0.010506    | 0.015124    | 0.01312     |
| 0.259078    | 0.390842    | 0.088032    | 0.044312    | 0           | 0.057096    | 0.274152    | 0.134104    | 0.143942    |
| 0.140448    | 0.14959     | 0.133387    | 0.195743    | 0.100431    | 0.085099    | 0.098553    | 0.106711    | 0.105685    |
| 0.065673    | 0.06992     | 0.053567    | 0.072019    | 0.077544    | 0.136585    | 0.061576    | 0.075246    | 0.196071    |
| 0.146601    | 0.153271    | 0.03477     | 0.032263    | 0           | 0.033195    | 0.226809    | 0.041674    | 0.049569    |
| 0.038484    | 0.042474    | 0.04853     | 0.066293    | 0.051272    | 0.046146    | 0.050637    | 0.044144    | 0.051173    |
| 0           | 0           | 0           | 0           | 0           | 0           | 0           | 0           | 0           |
| 0           | 0           | 0           | 0           | 0           | 0           | 0           | 0           | 0           |
| 0           | 0           | 0           | 0           | 0           | 0           | 0           | 0           | 0           |
| 0.029494    | 0.057056    | 0.06593     | 0.117006    | 0.036305    | 0.044798    | 0.034588    | 0.069257    | 0.133115    |
| 0.098822    | 0.113168    | 0.040893    | 0.041263    | 0           | 0.046024    | 0.135247    | 0.061184    | 0.042871    |
| 0.03282     | 0.034086    | 0.034838    | 0.044676    | 0.019931    | 0.027839    | 0.028814    | 0.025391    | 0.033698    |
| 0.4259      | 0.419403    | 0.098088    | 0.145423    | 0           | 0.072829    | 0           | 0.241874    | 0.258333    |
| 0.208819    | 0.230937    | 0.07291     | 0.112248    | 0.218528    | 0.522485    | 0.076791    | 0.049638    | 0.205701    |
| 0.252039    | 0.237021    | 0.071899    | 0.277839    | 0.069057    | 0.535078    | 0.285826    | 0.095354    | 0.070988    |
| 0.078223    | 0.0901      | 0.200717    | 0.186438    | 0.112175    | 0.090273    | 0.079937    | 0.152404    | 0.2156      |
| 0.099809    | 0.084225    | 0.098304    | 0.079366    | 0.087079    | 0.078328    | 0.084528    | 0.06913     | 0.083267    |
| 0.07666     | 0.081954    | 0.06212     | 0.220529    | 0.077399    | 0.152967    | 0.064448    | 0.077591    | 0.189454    |
| 0.297149    | 0.850234    | 0.634916    | 0.704358    | 0.473774    | 0.837203    | 0.351628    | 0.591044    | 0.766125    |
| 0.086177    | 0.105633    | 0.2558      | 0.276111    | 0.126913    | 0.094982    | 0.059043    | 0.184998    | 0.210091    |
| 0.017333    | 0.555844    | 0.651445    | 0.172685    | 0.093088    | 0.675912    | 0.105911    | 0.030375    | 0.053785    |
| 0.04259     | 0.151143    | 0.044666    | 0.037621    | 0.039868    | 0.116083    | 0.085602    | 0.042994    | 0.048085    |
| 0.1319      | 0.278961    | 0.249519    | 0.413489    | 0.212666    | 0.801964    | 0.105745    | 0.242648    | 0.573098    |
| 0.020061    | 0.880803    | 0.777946    | 0.213765    | 0.392548    | 0.711106    | 0.575474    | 0.277461    | 0.286452    |
| 0.016666    | 0.022154    | 0.015051    | 0.021448    | 0.014932    | 0.015821    | 0.012785    | 0.017365    | 0.017249    |
| 0.092734    | 0.101241    | 0.116658    | 0.155383    | 0.078796    | 0.16131     | 0.098458    | 0.079785    | 0.124271    |
| 0.62528     | 0.454827    | 0.069904    | 0.12382     | 0.773093    | 0.876122    | 0.253527    | 0.138753    | 0.354042    |
| 0.03183     | 0.066645    | 0.025396    | 0.038332    | 0.03045     | 0.057469    | 0.060909    | 0.029861    | 0.029628    |
| 0           | 0           | 0           | 0           | 0           | 0           | 0           | 0           | 0           |
| 0.050098    | 0.069465    | 0.057205    | 0.429448    | 0.046994    | 0.045667    | 0.049626    | 0.056678    | 0.076525    |
| 0.107207    | 0.120259    | 0.470952    | 0.627596    | 0.284335    | 0.131412    | 0.081847    | 0.413857    | 0.489961    |
| 0.028351    | 0.066583    | 0.041646    | 0.052084    | 0.022851    | 0.318914    | 0.020569    | 0.033398    | 0.077771    |
| 0.0807      | 0.074455    | 0.058367    | 0.117904    | 0.058934    | 0.06154     | 0.064583    | 0.068704    | 0.068485    |
| 0.146422    | 0.519405    | 0.85652     | 0.575655    | 0.466141    | 0.758248    | 0.518677    | 0.473303    | 0.470005    |
| 0.012974    | 0.011397    | 0.010813    | 0.025295    | 0.015491    | 0.015269    | 0.011416    | 0.013206    | 0.00923     |
| 0.233687    | 0.171118    | 0.251591    | 0.264057    | 0.154172    | 0.184147    | 0.107309    | 0.22707     | 0.258853    |
| 0.042428    | 0.054       | 0.036768    | 0.207696    | 0.053769    | 0.054474    | 0.04897     | 0.055029    | 0.124061    |
| 0.340544    | 0.366179    | 0.829009    | 0.56965     | 0.473422    | 0.752852    | 0.420426    | 0.532062    | 0.529777    |
| 0.045176    | 0.040413    | 0.161228    | 0.442469    | 0.094197    | 0.03326     | 0.029199    | 0.100335    | 0.201032    |
| 0.046068    | 0.045924    | 0.04928     | 0.082408    | 0.042633    | 0.043348    | 0.033696    | 0.059009    | 0.059132    |

TCGA. A4. 8 TCGA. BQ. 5 TCGA. BQ. 7 TCGA. IA. 7 TCGA. A4. 7 TCGA. UZ. 7 TCGA. IA. 7 TCGA. BQ. 5 TCGA. A4. 8

|          |          |          |          |          |          |          |          |          |
|----------|----------|----------|----------|----------|----------|----------|----------|----------|
| 0.059971 | 0.073369 | 0.274951 | 0.037607 | 0.051883 | 0.052962 | 0.046434 | 0.094787 | 0.215075 |
| 0.104489 | 0.053397 | 0        | 0        | 0.142659 | 0.18116  | 0.091692 | 0.041344 | 0        |
| 0.919757 | 0.877594 | 0.941558 | 0.941115 | 0.628039 | 0.541238 | 0.905453 | 0.936912 | 0.937264 |
| 0.028605 | 0.025654 | 0.028616 | 0.018205 | 0.027518 | 0.039003 | 0.024149 | 0.023413 | 0.022811 |
| 0        | 0        | 0        | 0        | 0        | 0        | 0        | 0        | 0        |
| 0.146591 | 0.709598 | 0.186233 | 0.193053 | 0.083404 | 0.110405 | 0.357966 | 0.422116 | 0.172469 |
| 0.139425 | 0.17536  | 0.620665 | 0.03786  | 0.19559  | 0.044368 | 0.033472 | 0.067978 | 0.076569 |
| 0.013785 | 0.021873 | 0.014538 | 0.01479  | 0.012737 | 0.016589 | 0.01338  | 0.013177 | 0.014518 |
| 0.207987 | 0.050982 | 0        | 0        | 0.325124 | 0.25939  | 0.096032 | 0.073389 | 0.429058 |
| 0.163528 | 0.203963 | 0.123998 | 0.096358 | 0.114434 | 0.104268 | 0.114094 | 0.121677 | 0.13352  |
| 0.127436 | 0.185522 | 0.434515 | 0.055747 | 0.0758   | 0.109384 | 0.12751  | 0.088109 | 0.063982 |
| 0.056133 | 0.032441 | 0        | 0        | 0.11105  | 0.08256  | 0.040676 | 0.041643 | 0        |
| 0.037985 | 0.083638 | 0.046026 | 0.040568 | 0.041397 | 0.042442 | 0.054067 | 0.064507 | 0.050464 |
| 0        | 0        | 0        | 0        | 0        | 0        | 0        | 0        | 0        |
| 0        | 0        | 0        | 0        | 0        | 0        | 0        | 0        | 0        |
| 0        | 0        | 0        | 0        | 0        | 0        | 0        | 0        | 0        |
| 0.033319 | 0.172138 | 0.04419  | 0.056941 | 0.051023 | 0.061707 | 0.053919 | 0.065155 | 0.042343 |
| 0.076851 | 0.063484 | 0        | 0        | 0.071571 | 0.073578 | 0.060453 | 0.075218 | 0        |
| 0.033816 | 0.045822 | 0.039139 | 0.0284   | 0.042396 | 0.040892 | 0.033111 | 0.028724 | 0.03302  |
| 0.310198 | 0.069004 | 0        | 0        | 0        | 0        | 0.149377 | 0        | 0        |
| 0.221969 | 0.284089 | 0.706769 | 0.0803   | 0.285626 | 0.064449 | 0.08352  | 0.149003 | 0.148572 |
| 0.052274 | 0.046978 | 0.463842 | 0.036246 | 0.041191 | 0.048846 | 0.05959  | 0.270151 | 0.634982 |
| 0.120324 | 0.341439 | 0.11426  | 0.196606 | 0.063782 | 0.131161 | 0.320665 | 0.195699 | 0.098007 |
| 0.108656 | 0.136684 | 0.10431  | 0.066023 | 0.097956 | 0.099121 | 0.107557 | 0.127168 | 0.084359 |
| 0.119342 | 0.183063 | 0.408281 | 0.059238 | 0.087993 | 0.109969 | 0.09509  | 0.085127 | 0.056832 |
| 0.812889 | 0.657547 | 0.847564 | 0.732002 | 0.376423 | 0.448711 | 0.541756 | 0.623681 | 0.358867 |
| 0.138894 | 0.420848 | 0.163831 | 0.195232 | 0.093208 | 0.106489 | 0.242356 | 0.26903  | 0.102214 |
| 0.048965 | 0.095897 | 0.137239 | 0.758793 | 0.0246   | 0.015794 | 0.386477 | 0.376851 | 0.249553 |
| 0.036099 | 0.052291 | 0.212431 | 0.035944 | 0.048303 | 0.034671 | 0.049553 | 0.045027 | 0.143368 |
| 0.357633 | 0.50472  | 0.818511 | 0.311498 | 0.188951 | 0.146244 | 0.341473 | 0.370948 | 0.159283 |
| 0.158672 | 0.287757 | 0.306628 | 0.886619 | 0.020162 | 0.024649 | 0.746931 | 0.616572 | 0.6143   |
| 0.015019 | 0.039415 | 0.017175 | 0.019012 | 0.01828  | 0.013661 | 0.020229 | 0.014271 | 0.015091 |
| 0.083997 | 0.080271 | 0.119167 | 0.181859 | 0.103295 | 0.081559 | 0.129958 | 0.087159 | 0.064488 |
| 0.725997 | 0.365701 | 0.907319 | 0.084983 | 0.683358 | 0.136932 | 0.114406 | 0.414468 | 0.605552 |
| 0.032211 | 0.031095 | 0.139095 | 0.024834 | 0.033605 | 0.035991 | 0.039814 | 0.020187 | 0.114167 |
| 0        | 0        | 0        | 0        | 0        | 0        | 0        | 0        | 0        |
| 0.052714 | 0.070509 | 0.049196 | 0.060485 | 0.084305 | 0.076184 | 0.103739 | 0.06589  | 0.07098  |
| 0.216516 | 0.725454 | 0.235797 | 0.262141 | 0.164759 | 0.16615  | 0.447771 | 0.538104 | 0.218519 |
| 0.055773 | 0.103139 | 0.623427 | 0.077426 | 0.044242 | 0.036795 | 0.041262 | 0.040084 | 0.02903  |
| 0.060914 | 0.089968 | 0.053141 | 0.073261 | 0.081326 | 0.078992 | 0.093742 | 0.078373 | 0.070447 |
| 0.464992 | 0.593605 | 0.708972 | 0.893241 | 0.154867 | 0.275566 | 0.72732  | 0.736182 | 0.61649  |
| 0.013344 | 0.013968 | 0.013894 | 0.012776 | 0.014605 | 0.012888 | 0.015622 | 0.016103 | 0.016472 |
| 0.256118 | 0.408348 | 0.119734 | 0.255803 | 0.14951  | 0.099217 | 0.211569 | 0.367186 | 0.119737 |
| 0.048037 | 0.185159 | 0.049158 | 0.059591 | 0.047864 | 0.052837 | 0.05851  | 0.069731 | 0.042889 |
| 0.476696 | 0.640009 | 0.737467 | 0.959268 | 0.390736 | 0.382152 | 0.607437 | 0.654192 | 0.455189 |
| 0.097975 | 0.375474 | 0.157034 | 0.074846 | 0.061898 | 0.045869 | 0.143122 | 0.177537 | 0.085804 |
| 0.062519 | 0.112608 | 0.058353 | 0.049618 | 0.04351  | 0.047189 | 0.080909 | 0.063828 | 0.051303 |

TCGA. Y8. ^ TCGA. 2Z. ^ TCGA. A4. ^ TCGA. IA. ^ TCGA. MH. ^ TCGA. F9. ^ TCGA. DW. ^ TCGA. BQ. ^ TCGA. MH. ^

|          |          |          |          |          |          |          |          |          |
|----------|----------|----------|----------|----------|----------|----------|----------|----------|
| 0.04248  | 0.04092  | 0.064875 | 0.031788 | 0.094211 | 0.042807 | 0.03103  | 0.082734 | 0.036116 |
| 0.026449 | 0.03885  | 0.072544 | 0        | 0        | 0        | 0.174764 | 0        | 0.047275 |
| 0.871407 | 0.775421 | 0.648237 | 0.927729 | 0.94271  | 0.875245 | 0.920932 | 0.902377 | 0.79377  |
| 0.013037 | 0.0267   | 0.035999 | 0.021291 | 0.027532 | 0.021362 | 0.024536 | 0.028368 | 0.029512 |
| 0        | 0        | 0        | 0        | 0        | 0        | 0        | 0        | 0        |
| 0.647621 | 0.391866 | 0.187886 | 0.184966 | 0.129549 | 0.308961 | 0.124156 | 0.508157 | 0.298463 |
| 0.087024 | 0.1022   | 0.064604 | 0.173858 | 0.035612 | 0.065587 | 0.368876 | 0.205045 | 0.146631 |
| 0.008241 | 0.013111 | 0.019746 | 0.014073 | 0.014245 | 0.014756 | 0.016581 | 0.01387  | 0.015309 |
| 0.06568  | 0.098996 | 0.200186 | 0        | 0        | 0        | 0.161579 | 0        | 0.09789  |
| 0.155164 | 0.106664 | 0.29605  | 0.187964 | 0.064597 | 0.112016 | 0.132132 | 0.136025 | 0.182929 |
| 0.104832 | 0.165042 | 0.165805 | 0.120635 | 0.100477 | 0.061758 | 0.125338 | 0.130953 | 0.082561 |
| 0.017853 | 0.030262 | 0.799599 | 0        | 0        | 0.319844 | 0.057726 | 0        | 0.041406 |
| 0.058062 | 0.038788 | 0.049617 | 0.047767 | 0.045358 | 0.057168 | 0.05445  | 0.09517  | 0.03646  |
| 0        | 0        | 0        | 0        | 0        | 0        | 0        | 0        | 0        |
| 0        | 0        | 0        | 0        | 0        | 0        | 0        | 0        | 0        |
| 0        | 0        | 0        | 0        | 0        | 0        | 0        | 0        | 0        |
| 0.085437 | 0.0689   | 0.061939 | 0.071156 | 0.040162 | 0.203361 | 0.054496 | 0.090663 | 0.03605  |
| 0.019966 | 0.052962 | 0.817113 | 0        | 0        | 0.393178 | 0.048493 | 0        | 0.063412 |
| 0.027484 | 0.029482 | 0.033499 | 0.027636 | 0.038844 | 0.66835  | 0.045993 | 0.055225 | 0.027682 |
| 0.060647 | 0.232122 | 0.904925 | 0        | 0        | 0        | 0        | 0        | 0.222328 |
| 0.160181 | 0.191739 | 0.109982 | 0.183971 | 0.102766 | 0.20619  | 0.414503 | 0.343322 | 0.21076  |
| 0.036638 | 0.051736 | 0.044208 | 0.032649 | 0.124332 | 0.029784 | 0.038575 | 0.138536 | 0.02678  |
| 0.429098 | 0.111015 | 0.171421 | 0.557341 | 0.175115 | 0.732813 | 0.176073 | 0.280468 | 0.10039  |
| 0.064277 | 0.077983 | 0.100577 | 0.068592 | 0.090624 | 0.086248 | 0.093508 | 0.094727 | 0.080382 |
| 0.099913 | 0.168721 | 0.142416 | 0.139685 | 0.096404 | 0.062014 | 0.139123 | 0.145487 | 0.076718 |
| 0.653375 | 0.602958 | 0.668442 | 0.751236 | 0.382501 | 0.838654 | 0.602181 | 0.750413 | 0.490032 |
| 0.295795 | 0.141639 | 0.254013 | 0.335802 | 0.098742 | 0.307325 | 0.242156 | 0.27321  | 0.168927 |
| 0.313488 | 0.075396 | 0.044384 | 0.081675 | 0.679943 | 0.027203 | 0.019044 | 0.05183  | 0.091384 |
| 0.03529  | 0.042406 | 0.050923 | 0.037978 | 0.052124 | 0.031747 | 0.039243 | 0.071622 | 0.041876 |
| 0.449753 | 0.329281 | 0.387054 | 0.738137 | 0.140867 | 0.531653 | 0.302723 | 0.697204 | 0.227905 |
| 0.450412 | 0.161383 | 0.063446 | 0.146708 | 0.879344 | 0.042241 | 0.028293 | 0.071199 | 0.095833 |
| 0.009583 | 0.016298 | 0.02066  | 0.019074 | 0.028671 | 0.530623 | 0.014777 | 0.016262 | 0.019928 |
| 0.248824 | 0.080425 | 0.141252 | 0.215535 | 0.086945 | 0.539831 | 0.160608 | 0.245246 | 0.070898 |
| 0.201301 | 0.165895 | 0.091159 | 0.574794 | 0.215198 | 0.595702 | 0.81753  | 0.482293 | 0.524519 |
| 0.023449 | 0.030042 | 0.039091 | 0.029021 | 0.042301 | 0.020193 | 0.026107 | 0.027421 | 0.024342 |
| 0        | 0        | 0        | 0        | 0        | 0        | 0        | 0        | 0        |
| 0.050645 | 0.065021 | 0.071839 | 0.046974 | 0.055026 | 0.577535 | 0.046975 | 0.073253 | 0.063098 |
| 0.774341 | 0.463321 | 0.229935 | 0.240109 | 0.210511 | 0.43357  | 0.223146 | 0.585134 | 0.347215 |
| 0.054762 | 0.036962 | 0.048153 | 0.090868 | 0.038088 | 0.034224 | 0.060925 | 0.1731   | 0.028147 |
| 0.045751 | 0.079808 | 0.083514 | 0.059459 | 0.054887 | 0.543538 | 0.071918 | 0.063356 | 0.071218 |
| 0.641544 | 0.523276 | 0.339768 | 0.39829  | 0.825769 | 0.245587 | 0.231085 | 0.526004 | 0.480869 |
| 0.007181 | 0.01439  | 0.015194 | 0.014288 | 0.016762 | 0.014577 | 0.013894 | 0.013689 | 0.013548 |
| 0.303991 | 0.13721  | 0.471497 | 0.439533 | 0.092283 | 0.382559 | 0.338897 | 0.221234 | 0.20423  |
| 0.085608 | 0.054048 | 0.081452 | 0.144606 | 0.059729 | 0.253433 | 0.071259 | 0.094159 | 0.045505 |
| 0.759874 | 0.58092  | 0.422946 | 0.44848  | 0.820247 | 0.407366 | 0.426315 | 0.627786 | 0.549758 |
| 0.244903 | 0.153991 | 0.068982 | 0.079497 | 0.102147 | 0.091267 | 0.136123 | 0.355023 | 0.112008 |
| 0.06317  | 0.077818 | 0.050785 | 0.039438 | 0.040581 | 0.047326 | 0.058047 | 0.094617 | 0.045628 |

TCGA. BQ. 7TCGA. UZ. 7TCGA. A4. 7TCGA. UZ. 7TCGA. PJ. 7TCGA. A4. 7TCGA. B1. 7TCGA. BQ. 7TCGA. J7. 6

|          |          |          |          |          |          |          |          |          |
|----------|----------|----------|----------|----------|----------|----------|----------|----------|
| 0.055944 | 0.056638 | 0.074529 | 0.044309 | 0.111755 | 0.071046 | 0.060288 | 0.05764  | 0.052774 |
| 0.055911 | 0        | 0.061163 | 0.124018 | 0        | 0        | 0        | 0        | 0.054321 |
| 0.95744  | 0.934326 | 0.920303 | 0.391454 | 0.921711 | 0.936309 | 0.914524 | 0.924108 | 0.827439 |
| 0.027635 | 0.025449 | 0.028808 | 0.017804 | 0.017206 | 0.015451 | 0.023283 | 0.029617 | 0.025184 |
| 0        | 0        | 0        | 0        | 0        | 0        | 0        | 0        | 0        |
| 0.362773 | 0.133921 | 0.293772 | 0.104853 | 0.243543 | 0.054777 | 0.223985 | 0.270449 | 0.278918 |
| 0.051505 | 0.136941 | 0.279165 | 0.032045 | 0.060403 | 0.051176 | 0.119341 | 0.236644 | 0.070245 |
| 0.014095 | 0.016505 | 0.012512 | 0.012748 | 0.014082 | 0.015163 | 0.014954 | 0.015694 | 0.016264 |
| 0.090554 | 0        | 0.121875 | 0.219191 | 0        | 0.468648 | 0        | 0        | 0.082347 |
| 0.175544 | 0.068015 | 0.131206 | 0.051466 | 0.049459 | 0.056822 | 0.133733 | 0.161978 | 0.143564 |
| 0.082882 | 0.157323 | 0.077224 | 0.071478 | 0.118703 | 0.048532 | 0.080377 | 0.086898 | 0.078622 |
| 0.044721 | 0        | 0.064881 | 0.083824 | 0.406244 | 0        | 0        | 0        | 0.060956 |
| 0.05876  | 0.048925 | 0.054352 | 0.043169 | 0.077671 | 0.042698 | 0.050623 | 0.047953 | 0.049278 |
| 0        | 0        | 0        | 0        | 0        | 0        | 0        | 0        | 0        |
| 0        | 0        | 0        | 0        | 0        | 0        | 0        | 0        | 0        |
| 0        | 0        | 0        | 0        | 0        | 0        | 0        | 0        | 0        |
| 0.087601 | 0.037842 | 0.046893 | 0.047587 | 0.079119 | 0.030278 | 0.051151 | 0.055888 | 0.098328 |
| 0.064456 | 0        | 0.04851  | 0.06313  | 0        | 0.472992 | 0        | 0        | 0.066897 |
| 0.045419 | 0.02377  | 0.03854  | 0.027405 | 0.038672 | 0.027905 | 0.025564 | 0.049097 | 0.03731  |
| 0.112177 | 0        | 0.25852  | 0.41185  | 0        | 0        | 0        | 0        | 0.290174 |
| 0.100177 | 0.191368 | 0.284251 | 0.083732 | 0.159339 | 0.043417 | 0.175586 | 0.221287 | 0.127841 |
| 0.083649 | 0.028627 | 0.061753 | 0.037077 | 0.350675 | 0.564354 | 0.089326 | 0.070422 | 0.042899 |
| 0.330198 | 0.08108  | 0.298362 | 0.07503  | 0.203831 | 0.097273 | 0.094328 | 0.310419 | 0.117285 |
| 0.096624 | 0.055297 | 0.101761 | 0.088061 | 0.098349 | 0.090741 | 0.099839 | 0.118422 | 0.100241 |
| 0.079025 | 0.182702 | 0.098913 | 0.064375 | 0.104072 | 0.05811  | 0.071359 | 0.103914 | 0.080003 |
| 0.745437 | 0.864844 | 0.769369 | 0.094822 | 0.778137 | 0.936146 | 0.467678 | 0.624245 | 0.327405 |
| 0.192562 | 0.09572  | 0.219581 | 0.088696 | 0.217571 | 0.05545  | 0.135449 | 0.223743 | 0.155797 |
| 0.067122 | 0.690749 | 0.043029 | 0.017308 | 0.199735 | 0.891946 | 0.034767 | 0.054527 | 0.11263  |
| 0.039964 | 0.031327 | 0.050961 | 0.031767 | 0.047746 | 0.052314 | 0.042615 | 0.049061 | 0.054744 |
| 0.485865 | 0.494618 | 0.509117 | 0.115267 | 0.591887 | 0.881625 | 0.186409 | 0.602132 | 0.192271 |
| 0.411389 | 0.827768 | 0.317113 | 0.027682 | 0.260646 | 0.940067 | 0.542857 | 0.168747 | 0.082133 |
| 0.01864  | 0.013337 | 0.018473 | 0.015227 | 0.02224  | 0.01771  | 0.017292 | 0.036547 | 0.015333 |
| 0.115527 | 0.087257 | 0.132452 | 0.077002 | 0.112446 | 0.108334 | 0.110707 | 0.125008 | 0.11957  |
| 0.508666 | 0.545127 | 0.807565 | 0.144788 | 0.535216 | 0.085563 | 0.531166 | 0.588515 | 0.272143 |
| 0.023974 | 0.024885 | 0.027848 | 0.029591 | 0.038594 | 0.033669 | 0.025871 | 0.027272 | 0.031554 |
| 0        | 0        | 0        | 0        | 0        | 0        | 0        | 0        | 0        |
| 0.066752 | 0.051222 | 0.063693 | 0.044937 | 0.067083 | 0.041263 | 0.060961 | 0.067414 | 0.053697 |
| 0.42596  | 0.201833 | 0.36796  | 0.162985 | 0.314063 | 0.115831 | 0.25522  | 0.320233 | 0.355563 |
| 0.038531 | 0.11062  | 0.074358 | 0.028539 | 0.068423 | 0.054549 | 0.033181 | 0.077512 | 0.05944  |
| 0.075449 | 0.071814 | 0.087798 | 0.061154 | 0.075333 | 0.050614 | 0.062187 | 0.061773 | 0.072775 |
| 0.515981 | 0.80784  | 0.52198  | 0.230257 | 0.751808 | 0.932656 | 0.366369 | 0.465433 | 0.428163 |
| 0.011094 | 0.017143 | 0.011176 | 0.014495 | 0.016219 | 0.015352 | 0.01418  | 0.011525 | 0.013481 |
| 0.193845 | 0.107652 | 0.271559 | 0.103497 | 0.121517 | 0.082722 | 0.1356   | 0.263143 | 0.19655  |
| 0.076567 | 0.042836 | 0.07238  | 0.055498 | 0.080041 | 0.032595 | 0.068848 | 0.06639  | 0.09484  |
| 0.495499 | 0.893902 | 0.617442 | 0.387877 | 0.736033 | 0.918048 | 0.439661 | 0.516752 | 0.509817 |
| 0.190102 | 0.054147 | 0.219953 | 0.035969 | 0.147919 | 0.036956 | 0.084171 | 0.14432  | 0.156638 |
| 0.07227  | 0.04046  | 0.061384 | 0.044553 | 0.066664 | 0.034223 | 0.050627 | 0.059903 | 0.050218 |

| TCGA. BQ. 7 | TCGA. GL. 7 | TCGA. A4. 7 | TCGA. 5P. 7 | TCGA. A4. 7 | TCGA. B9. 7 | TCGA. G7. 7 | TCGA. 2Z. 7 | TCGA. 2Z. 7 |
|-------------|-------------|-------------|-------------|-------------|-------------|-------------|-------------|-------------|
| 0.03452     | 0.046531    | 0.15124     | 0.040619    | 0.0396      | 0.050296    | 0.066495    | 0.048147    | 0.044402    |
| 0.051235    | 0           | 0           | 0.073882    | 0           | 0.069125    | 0.031389    | 0.095332    | 0.032949    |
| 0.931707    | 0.948218    | 0.94068     | 0.533809    | 0.877762    | 0.859745    | 0.93834     | 0.913126    | 0.565187    |
| 0.021418    | 0.028367    | 0.020363    | 0.036652    | 0.019505    | 0.039718    | 0.022404    | 0.02361     | 0.021157    |
| 0           | 0           | 0           | 0           | 0           | 0           | 0           | 0           | 0           |
| 0.403818    | 0.238552    | 0.232799    | 0.94402     | 0.104275    | 0.26982     | 0.303997    | 0.172663    | 0.181027    |
| 0.075951    | 0.051787    | 0.311007    | 0.070702    | 0.175951    | 0.049993    | 0.033673    | 0.028514    | 0.077472    |
| 0.011861    | 0.013862    | 0.015438    | 0.017759    | 0.015766    | 0.013724    | 0.010642    | 0.013236    | 0.011952    |
| 0.103456    | 0           | 0           | 0.231578    | 0           | 0.075721    | 0.050636    | 0.272619    | 0.057642    |
| 0.140755    | 0.133372    | 0.07922     | 0.148607    | 0.127674    | 0.144189    | 0.119281    | 0.093953    | 0.078388    |
| 0.083471    | 0.077982    | 0.050466    | 0.51101     | 0.065444    | 0.068789    | 0.05403     | 0.061676    | 0.233656    |
| 0.029641    | 0           | 0.400042    | 0.070949    | 0           | 0.039882    | 0.025611    | 0.055061    | 0.025934    |
| 0.074909    | 0.044779    | 0.046065    | 0.058009    | 0.045592    | 0.045963    | 0.055719    | 0.035952    | 0.054231    |
| 0           | 0           | 0           | 0           | 0           | 0           | 0           | 0           | 0           |
| 0           | 0           | 0           | 0           | 0           | 0           | 0           | 0           | 0           |
| 0           | 0           | 0           | 0           | 0           | 0           | 0           | 0           | 0           |
| 0.066465    | 0.035707    | 0.078226    | 0.355358    | 0.023404    | 0.10981     | 0.062717    | 0.058774    | 0.048322    |
| 0.055786    | 0           | 0           | 0.065834    | 0           | 0.050837    | 0.037302    | 0.050191    | 0.029669    |
| 0.032872    | 0.041213    | 0.028799    | 0.060642    | 0.032617    | 0.034588    | 0.039119    | 0.026115    | 0.026704    |
| 0.131575    | 0           | 0           | 0.429817    | 0           | 0.269684    | 0.045246    | 0.327624    | 0.081308    |
| 0.103757    | 0.047132    | 0.405369    | 0.503706    | 0.307987    | 0.088142    | 0.084756    | 0.076205    | 0.108461    |
| 0.031909    | 0.039509    | 0.424543    | 0.518347    | 0.344153    | 0.027563    | 0.077318    | 0.046869    | 0.07683     |
| 0.167205    | 0.094231    | 0.084848    | 0.80917     | 0.198213    | 0.175604    | 0.05988     | 0.079917    | 0.088614    |
| 0.109789    | 0.082914    | 0.086634    | 0.073717    | 0.089903    | 0.094343    | 0.080404    | 0.080326    | 0.081646    |
| 0.101188    | 0.066987    | 0.0534      | 0.551029    | 0.068979    | 0.123372    | 0.072569    | 0.070636    | 0.210331    |
| 0.35515     | 0.258349    | 0.647314    | 0.488562    | 0.671654    | 0.565943    | 0.228686    | 0.148955    | 0.059061    |
| 0.224921    | 0.181657    | 0.131479    | 0.334054    | 0.15176     | 0.237454    | 0.106807    | 0.106654    | 0.056069    |
| 0.247984    | 0.079018    | 0.15712     | 0.017136    | 0.042261    | 0.053995    | 0.037384    | 0.032222    | 0.020229    |
| 0.033781    | 0.046036    | 0.056898    | 0.042213    | 0.039518    | 0.038062    | 0.05352     | 0.035026    | 0.038296    |
| 0.35084     | 0.112452    | 0.215632    | 0.718311    | 0.282487    | 0.333082    | 0.203783    | 0.123041    | 0.107129    |
| 0.436209    | 0.286246    | 0.466515    | 0.018929    | 0.090116    | 0.107062    | 0.695499    | 0.035802    | 0.017371    |
| 0.015911    | 0.013819    | 0.01934     | 0.014412    | 0.01971     | 0.020495    | 0.014276    | 0.017003    | 0.011421    |
| 0.164627    | 0.082884    | 0.081865    | 0.087377    | 0.092769    | 0.130254    | 0.087942    | 0.08445     | 0.068257    |
| 0.269592    | 0.079776    | 0.766024    | 0.83118     | 0.781342    | 0.233566    | 0.056901    | 0.098374    | 0.099803    |
| 0.026327    | 0.033317    | 0.036857    | 0.034356    | 0.023622    | 0.021877    | 0.027338    | 0.031827    | 0.032188    |
| 0           | 0           | 0           | 0           | 0           | 0           | 0           | 0           | 0           |
| 0.07114     | 0.058224    | 0.063118    | 0.064377    |             |             |             |             |             |

| TCGA. BQ. 5 | TCGA. A4. 8 | TCGA. IZ. 8 | TCGA. A4. 8 | TCGA. B9. 7 | TCGA. A4. 7 | TCGA. B9. 7 | TCGA. 2Z. 7 | TCGA. 2Z. 7 |
|-------------|-------------|-------------|-------------|-------------|-------------|-------------|-------------|-------------|
| 0.05021     | 0.061291    | 0.056135    | 0.038718    | 0.052946    | 0.732969    | 0.532851    | 0.050709    | 0.061944    |
| 0           | 0.070128    | 0.144519    | 0.037467    | 0.109968    | 0           | 0.029509    | 0.250197    | 0.050775    |
| 0.951608    | 0.943595    | 0.949555    | 0.887892    | 0.674707    | 0.935694    | 0.918945    | 0.599611    | 0.930069    |
| 0.034743    | 0.020841    | 0.029678    | 0.032812    | 0.020915    | 0.021611    | 0.020833    | 0.019211    | 0.0306      |
| 0           | 0           | 0           | 0           | 0           | 0           | 0           | 0           | 0           |
| 0.125868    | 0.166755    | 0.113322    | 0.395075    | 0.166023    | 0.059581    | 0.365935    | 0.069074    | 0.293412    |
| 0.043429    | 0.280038    | 0.079759    | 0.060792    | 0.118615    | 0.733789    | 0.143889    | 0.222798    | 0.084156    |
| 0.01578     | 0.015549    | 0.015048    | 0.01466     | 0.014687    | 0.016856    | 0.01067     | 0.014958    | 0.01765     |
| 0           | 0.123417    | 0.308116    | 0.029819    | 0.16845     | 0           | 0.045025    | 0.296771    | 0.16334     |
| 0.087171    | 0.140512    | 0.118892    | 0.192327    | 0.135518    | 0.074769    | 0.075911    | 0.085738    | 0.271568    |
| 0.041377    | 0.085554    | 0.218308    | 0.132637    | 0.052244    | 0.163257    | 0.114754    | 0.054101    | 0.071762    |
| 0           | 0.052469    | 0.089951    | 0.026148    | 0.072901    | 0           | 0.04056     | 0.201626    | 0.058061    |
| 0.04442     | 0.04651     | 0.038618    | 0.069481    | 0.039942    | 0.050585    | 0.049724    | 0.040578    | 0.03865     |
| 0           | 0           | 0           | 0           | 0           | 0           | 0           | 0           | 0           |
| 0           | 0           | 0           | 0           | 0           | 0           | 0           | 0           | 0           |
| 0           | 0           | 0           | 0           | 0           | 0           | 0           | 0           | 0           |
| 0.04076     | 0.061062    | 0.039234    | 0.119571    | 0.038336    | 0.041627    | 0.049087    | 0.036048    | 0.162988    |
| 0           | 0.07633     | 0.100671    | 0.058065    | 0.07056     | 0           | 0.023087    | 0.105995    | 0.043634    |
| 0.041717    | 0.038589    | 0.035181    | 0.036219    | 0.043208    | 0.023989    | 0.025835    | 0.039112    | 0.126923    |
| 0           | 0.364623    | 0.424731    | 0.055072    | 0.328345    | 0           | 0.077885    | 0           | 0.299299    |
| 0.071378    | 0.377122    | 0.140558    | 0.1093      | 0.214849    | 0.769377    | 0.187218    | 0.327929    | 0.121445    |
| 0.022006    | 0.028369    | 0.164718    | 0.028606    | 0.036177    | 0.590027    | 0.742722    | 0.033515    | 0.044181    |
| 0.087597    | 0.085873    | 0.112349    | 0.27609     | 0.138971    | 0.16091     | 0.169353    | 0.093346    | 0.493107    |
| 0.100252    | 0.081523    | 0.104452    | 0.104478    | 0.075777    | 0.091555    | 0.087265    | 0.088653    | 0.085083    |
| 0.093571    | 0.066666    | 0.203751    | 0.11845     | 0.046279    | 0.158573    | 0.148336    | 0.048426    | 0.092745    |
| 0.557793    | 0.895186    | 0.818677    | 0.496215    | 0.462235    | 0.819768    | 0.862294    | 0.739954    | 0.487731    |
| 0.107571    | 0.130475    | 0.094467    | 0.286467    | 0.176345    | 0.086465    | 0.131249    | 0.073889    | 0.476224    |
| 0.196089    | 0.50603     | 0.80423     | 0.329548    | 0.018185    | 0.297929    | 0.654447    | 0.020975    | 0.253063    |
| 0.044679    | 0.051132    | 0.041754    | 0.036128    | 0.039181    | 0.748423    | 0.523208    | 0.045404    | 0.03696     |
| 0.320863    | 0.821278    | 0.724588    | 0.278883    | 0.169807    | 0.455215    | 0.633231    | 0.516928    | 0.319153    |
| 0.936682    | 0.867839    | 0.865681    | 0.353925    | 0.02576     | 0.793153    | 0.708544    | 0.061026    | 0.402334    |
| 0.012885    | 0.016198    | 0.016424    | 0.01556     | 0.027572    | 0.014665    | 0.014027    | 0.01616     | 0.256348    |
| 0.102609    | 0.088643    | 0.073954    | 0.082223    | 0.074146    | 0.157179    | 0.203841    | 0.08356     | 0.381935    |
| 0.064177    | 0.744267    | 0.260938    | 0.137557    | 0.690771    | 0.908633    | 0.791327    | 0.850588    | 0.517034    |
| 0.027336    | 0.0265      | 0.026433    | 0.025725    | 0.031374    | 0.65676     | 0.366812    | 0.031526    | 0.031459    |
| 0           | 0           | 0           | 0           | 0           | 0           | 0           | 0           | 0           |
| 0.063489    | 0.054053    | 0.062378    | 0.057375    | 0.051994    | 0.045745    | 0.046409    | 0.060811    | 0.151017    |
| 0.226217    | 0.205906    | 0.192712    | 0.4582      | 0.226521    | 0.130844    | 0.42162     | 0.107885    | 0.314709    |
| 0.033611    | 0.039655    | 0.111765    | 0.053682    | 0.039131    | 0.089453    | 0.254105    | 0.023136    | 0.034107    |
| 0.070712    | 0.067379    | 0.080925    | 0.080558    | 0.063872    | 0.056914    | 0.061742    | 0.068819    | 0.125622    |
| 0.548374    | 0.809382    | 0.881601    | 0.648912    | 0.340564    | 0.675768    | 0.849508    | 0.248396    | 0.702372    |
| 0.01453     | 0.015911    | 0.0149      | 0.015165    | 0.01273     | 0.016477    | 0.012469    | 0.013912    | 0.012472    |
| 0.115073    | 0.13975     | 0.111601    | 0.289943    | 0.236698    | 0.076075    | 0.204154    | 0.073139    | 0.508658    |
| 0.061196    | 0.046791    | 0.044872    | 0.111317    | 0.052525    | 0.041676    | 0.044152    | 0.030475    | 0.190541    |
| 0.331013    | 0.73543     | 0.885005    | 0.658566    | 0.470868    | 0.35641     | 0.853347    | 0.321423    | 0.673698    |
| 0.056777    | 0.122698    | 0.050928    | 0.210128    | 0.095865    | 0.058885    | 0.152562    | 0.046642    | 0.153864    |
| 0.043236    | 0.04872     | 0.04647     | 0.094529    | 0.047269    | 0.045847    | 0.053338    | 0.046074    | 0.057359    |

TCGA. UZ. ^TCGA. DW. ^TCGA. A4. ^TCGA. J7. ^TCGA. HE. ^TCGA. B9. ^TCGA. MH. ^TCGA. HE. ^TCGA. HE. ^

|          |          |          |          |          |          |          |          |          |
|----------|----------|----------|----------|----------|----------|----------|----------|----------|
| 0.040135 | 0.048523 | 0.325556 | 0.031379 | 0.103915 | 0.041347 | 0.099616 | 0.037031 | 0.064778 |
| 0        | 0.303475 | 0.024066 | 0.033843 | 0.030115 | 0.193695 | 0.06541  | 0.08526  | 0        |
| 0.946463 | 0.68415  | 0.931389 | 0.930794 | 0.895956 | 0.940334 | 0.889638 | 0.617512 | 0.922287 |
| 0.026691 | 0.021339 | 0.031774 | 0.020152 | 0.018431 | 0.031644 | 0.18339  | 0.034277 | 0.025341 |
| 0        | 0        | 0        | 0        | 0        | 0        | 0        | 0        | 0        |
| 0.06137  | 0.062407 | 0.241327 | 0.91066  | 0.564005 | 0.118544 | 0.291926 | 0.215981 | 0.315945 |
| 0.023192 | 0.030422 | 0.134799 | 0.040001 | 0.053938 | 0.35357  | 0.351387 | 0.034614 | 0.074226 |
| 0.012493 | 0.012019 | 0.0163   | 0.012708 | 0.014775 | 0.016005 | 0.150732 | 0.017249 | 0.013418 |
| 0        | 0.350968 | 0.036478 | 0.055125 | 0.039832 | 0.314853 | 0.112004 | 0.200259 | 0        |
| 0.093016 | 0.121004 | 0.197777 | 0.079723 | 0.134183 | 0.266105 | 0.292419 | 0.170521 | 0.282313 |
| 0.041055 | 0.160932 | 0.08463  | 0.122086 | 0.080598 | 0.114556 | 0.139011 | 0.06304  | 0.090951 |
| 0.270007 | 0.234788 | 0.02395  | 0.025287 | 0.029696 | 0.088997 | 0.057175 | 0.085796 | 0        |
| 0.035647 | 0.039164 | 0.044862 | 0.049937 | 0.075361 | 0.051195 | 0.061885 | 0.043446 | 0.05561  |
| 0        | 0        | 0        | 0        | 0        | 0        | 0        | 0        | 0        |
| 0        | 0        | 0        | 0        | 0        | 0        | 0        | 0        | 0        |
| 0        | 0        | 0        | 0        | 0        | 0        | 0        | 0        | 0        |
| 0.046947 | 0.029992 | 0.078118 | 0.042697 | 0.096255 | 0.075535 | 0.244322 | 0.035698 | 0.123727 |
| 0.137972 | 0.218734 | 0.04633  | 0.049332 | 0.082868 | 0.064127 | 0.063953 | 0.072953 | 0        |
| 0.024627 | 0.030579 | 0.024622 | 0.033276 | 0.032741 | 0.434278 | 0.112547 | 0.032839 | 0.048096 |
| 0        | 0        | 0.057801 | 0.079547 | 0.066567 | 0.449516 | 0.285642 | 0.378625 | 0        |
| 0.057596 | 0.129767 | 0.214509 | 0.092803 | 0.140243 | 0.378211 | 0.334807 | 0.079507 | 0.08883  |
| 0.031181 | 0.046121 | 0.441356 | 0.03372  | 0.526759 | 0.061913 | 0.524037 | 0.032771 | 0.026432 |
| 0.096596 | 0.115584 | 0.173411 | 0.460934 | 0.211454 | 0.728948 | 0.496722 | 0.1356   | 0.251906 |
| 0.062316 | 0.088705 | 0.103207 | 0.079713 | 0.097853 | 0.123056 | 0.11941  | 0.101119 | 0.101598 |
| 0.062954 | 0.157815 | 0.07979  | 0.12795  | 0.068058 | 0.118026 | 0.148283 | 0.071145 | 0.104681 |
| 0.59446  | 0.074097 | 0.592522 | 0.135909 | 0.633191 | 0.839151 | 0.793394 | 0.230837 | 0.146801 |
| 0.076791 | 0.086488 | 0.180001 | 0.18272  | 0.239101 | 0.48636  | 0.377477 | 0.143673 | 0.326286 |
| 0.028262 | 0.016262 | 0.125126 | 0.023621 | 0.109113 | 0.792163 | 0.04245  | 0.045751 | 0.389155 |
| 0.026769 | 0.050049 | 0.223938 | 0.031896 | 0.046243 | 0.050846 | 0.073124 | 0.043862 | 0.046233 |
| 0.160813 | 0.069458 | 0.212551 | 0.042161 | 0.370558 | 0.794065 | 0.761795 | 0.131909 | 0.115446 |
| 0.816673 | 0.025045 | 0.423836 | 0.303142 | 0.240441 | 0.838831 | 0.147602 | 0.05529  | 0.751211 |
| 0.013743 | 0.014115 | 0.031923 | 0.016554 | 0.026099 | 0.514564 | 0.209059 | 0.016381 | 0.017469 |
| 0.084553 | 0.097301 | 0.102588 | 0.091847 | 0.094228 | 0.631364 | 0.438859 | 0.08792  | 0.15676  |
| 0.050105 | 0.227762 | 0.378642 | 0.170068 | 0.352851 | 0.894973 | 0.640649 | 0.136081 | 0.068398 |
| 0.025324 | 0.026575 | 0.172533 | 0.029114 | 0.041226 | 0.029456 | 0.029543 | 0.027146 | 0.025454 |
| 0        | 0        | 0        | 0        | 0        | 0        | 0        | 0        | 0        |
| 0.05202  | 0.077291 | 0.057142 | 0.067628 | 0.057729 | 0.450805 | 0.205271 | 0.063627 | 0.068831 |
| 0.118956 | 0.107527 | 0.283197 | 0.9052   | 0.615011 | 0.15875  | 0.360178 | 0.261418 | 0.39671  |
| 0.02215  | 0.029369 | 0.047089 | 0.025368 | 0.029461 | 0.211026 | 0.085295 | 0.031524 | 0.032622 |
| 0.061151 | 0.056004 | 0.084324 | 0.075367 | 0.063192 | 0.374078 | 0.164773 | 0.079206 | 0.075269 |
| 0.155341 | 0.117999 | 0.446027 | 0.207753 | 0.619937 | 0.863431 | 0.406841 | 0.469217 | 0.826817 |
| 0.012285 | 0.011863 | 0.014882 | 0.014518 | 0.015331 | 0.012916 | 0.025282 | 0.015347 | 0.012801 |
| 0.05372  | 0.18106  | 0.197532 | 0.299794 | 0.238574 | 0.507248 | 0.470161 | 0.121639 | 0.515682 |
| 0.051099 | 0.05293  | 0.07396  | 0.04752  | 0.09479  | 0.114193 | 0.272536 | 0.046849 | 0.14473  |
| 0.315593 | 0.256684 | 0.477429 | 0.156861 | 0.643773 | 0.864538 | 0.554167 | 0.512262 | 0.816051 |
| 0.043799 | 0.049653 | 0.147723 | 0.041948 | 0.237425 | 0.101787 | 0.189111 | 0.092944 | 0.09094  |
| 0.033702 | 0.039723 | 0.061294 | 0.036855 | 0.085575 | 0.045492 | 0.052423 | 0.053137 | 0.054912 |



TCGA. SX. ^TCGA. G7. ^TCGA. IA. ^TCGA. GL. ^TCGA. P4. ^TCGA. Y8. ^TCGA. G7. ^TCGA. P4. ^TCGA. BQ. 7

|          |          |          |          |          |          |          |          |          |
|----------|----------|----------|----------|----------|----------|----------|----------|----------|
| 0.08298  | 0.045781 | 0.053246 | 0.12039  | 0.036547 | 0.067244 | 0.34431  | 0.513603 | 0.044915 |
| 0.101797 | 0.088645 | 0.058652 | 0.127311 | 0.041457 | 0.093577 | 0.31816  | 0.027123 | 0.041787 |
| 0.93335  | 0.88345  | 0.906336 | 0.921702 | 0.642622 | 0.925613 | 0.936915 | 0.920888 | 0.560669 |
| 0.027945 | 0.01758  | 0.039503 | 0.020249 | 0.034725 | 0.028555 | 0.022397 | 0.037326 | 0.032952 |
| 0        | 0        | 0        | 0        | 0        | 0        | 0        | 0        | 0        |
| 0.206905 | 0.17875  | 0.448113 | 0.139683 | 0.471355 | 0.243912 | 0.030183 | 0.097837 | 0.433943 |
| 0.208983 | 0.114366 | 0.057495 | 0.474129 | 0.028896 | 0.056246 | 0.126109 | 0.058317 | 0.048091 |
| 0.019864 | 0.015863 | 0.014246 | 0.010817 | 0.016721 | 0.013879 | 0.012794 | 0.012901 | 0.01059  |
| 0.213674 | 0.287121 | 0.085537 | 0.192242 | 0.041505 | 0.210069 | 0        | 0.06496  | 0.101264 |
| 0.153771 | 0.056188 | 0.138921 | 0.075573 | 0.133382 | 0.035188 | 0.056542 | 0.061615 | 0.125971 |
| 0.097154 | 0.118734 | 0.119251 | 0.205018 | 0.166829 | 0.056189 | 0.068792 | 0.186181 | 0.068979 |
| 0.066869 | 0.076773 | 0.035168 | 0.161963 | 0.022019 | 0.126224 | 0.247847 | 0.029404 | 0.025758 |
| 0.063222 | 0.044967 | 0.054327 | 0.044307 | 0.050134 | 0.058561 | 0.044223 | 0.037815 | 0.050459 |
| 0        | 0        | 0        | 0        | 0        | 0        | 0        | 0        | 0        |
| 0        | 0        | 0        | 0        | 0        | 0        | 0        | 0        | 0        |
| 0        | 0        | 0        | 0        | 0        | 0        | 0        | 0        | 0        |
| 0.082401 | 0.024566 | 0.109465 | 0.024233 | 0.037008 | 0.02019  | 0.026577 | 0.022267 | 0.070663 |
| 0.078058 | 0.066027 | 0.057016 | 0.06188  | 0.034759 | 0.050362 | 0.161462 | 0.037518 | 0.03043  |
| 0.047089 | 0.031012 | 0.03343  | 0.033049 | 0.028964 | 0.029609 | 0.042382 | 0.037222 | 0.035742 |
| 0.338497 | 0.355837 | 0.133126 | 0        | 0.0665   | 0        | 0        | 0.074668 | 0.114241 |
| 0.264659 | 0.218912 | 0.063771 | 0.732083 | 0.035341 | 0.104821 | 0.207394 | 0.090811 | 0.087619 |
| 0.045453 | 0.033201 | 0.067539 | 0.084516 | 0.152062 | 0.361056 | 0.460777 | 0.931101 | 0.070305 |
| 0.202125 | 0.105894 | 0.189379 | 0.106982 | 0.205988 | 0.203097 | 0.055158 | 0.090655 | 0.125743 |
| 0.073971 | 0.092846 | 0.086974 | 0.095805 | 0.093103 | 0.08027  | 0.068999 | 0.097223 | 0.10554  |
| 0.109377 | 0.128258 | 0.126587 | 0.224059 | 0.166296 | 0.06461  | 0.074726 | 0.19911  | 0.05706  |
| 0.634722 | 0.220994 | 0.632851 | 0.895551 | 0.194629 | 0.822543 | 0.870102 | 0.852686 | 0.446965 |
| 0.183657 | 0.098938 | 0.226428 | 0.068621 | 0.293133 | 0.118254 | 0.065905 | 0.069149 | 0.226044 |
| 0.096368 | 0.057516 | 0.089827 | 0.014358 | 0.183658 | 0.047    | 0.096795 | 0.745183 | 0.071794 |
| 0.054593 | 0.032601 | 0.054549 | 0.050379 | 0.033085 | 0.044269 | 0.224887 | 0.473739 | 0.047571 |
| 0.288596 | 0.195446 | 0.356818 | 0.844503 | 0.14385  | 0.654783 | 0.554717 | 0.624952 | 0.344795 |
| 0.532926 | 0.746181 | 0.103631 | 0.190275 | 0.220143 | 0.339441 | 0.457528 | 0.874179 | 0.141792 |
| 0.019583 | 0.015209 | 0.028273 | 0.009998 | 0.01659  | 0.014235 | 0.021186 | 0.011943 | 0.015184 |
| 0.110102 | 0.068431 | 0.105673 | 0.168714 | 0.062367 | 0.387569 | 0.059844 | 0.095855 | 0.094698 |
| 0.600398 | 0.399281 | 0.085373 | 0.922106 | 0.048281 | 0.220649 | 0.622369 | 0.152959 | 0.079718 |
| 0.055883 | 0.024334 | 0.032036 | 0.03894  | 0.027682 | 0.02689  | 0.183438 | 0.339756 | 0.029507 |
| 0        | 0        | 0        | 0        | 0        | 0        | 0        | 0        | 0        |
| 0.064228 | 0.046313 | 0.067872 | 0.047673 | 0.044727 | 0.058226 | 0.073109 | 0.051699 | 0.072809 |
| 0.303226 | 0.273774 | 0.493818 | 0.198327 | 0.494397 | 0.32713  | 0.069237 | 0.161219 | 0.468934 |
| 0.05692  | 0.051683 | 0.069274 | 0.5863   | 0.028357 | 0.073322 | 0.077488 | 0.043275 | 0.03759  |
| 0.064266 | 0.074217 | 0.070699 | 0.065874 | 0.083105 | 0.051991 | 0.075078 | 0.067943 | 0.066959 |
| 0.386384 | 0.514477 | 0.529991 | 0.643448 | 0.511113 | 0.636021 | 0.776409 | 0.879475 | 0.443625 |
| 0.014882 | 0.01476  | 0.014598 | 0.0106   | 0.014098 | 0.017237 | 0.012945 | 0.014623 | 0.009333 |
| 0.128275 | 0.190502 | 0.181832 | 0.140877 | 0.184651 | 0.041146 | 0.104354 | 0.087284 | 0.163352 |
| 0.066616 | 0.033356 | 0.078375 | 0.03748  | 0.036128 | 0.026839 | 0.032908 | 0.06543  | 0.067849 |
| 0.53378  | 0.336762 | 0.571538 | 0.579889 | 0.558854 | 0.473443 | 0.444573 | 0.893022 | 0.604944 |
| 0.087673 | 0.065325 | 0.149555 | 0.070466 | 0.145103 | 0.060288 | 0.028    | 0.064445 | 0.173326 |
| 0.056758 | 0.04033  | 0.063344 | 0.027784 | 0.065966 | 0.047313 | 0.031839 | 0.057537 | 0.083419 |

TCGA. V9. A TCGA. UZ. A TCGA. UZ. A TCGA. G7. E TCGA. IA. A TCGA. J7. E TCGA. A4. 7 TCGA. SX. A TCGA. 2K. A

|          |          |          |          |          |          |          |          |          |
|----------|----------|----------|----------|----------|----------|----------|----------|----------|
| 0.102234 | 0.037292 | 0.052348 | 0.144909 | 0.04672  | 0.0314   | 0.041551 | 0.042959 | 0.04798  |
| 0.05441  | 0.058528 | 0.211896 | 0.062836 | 0.061156 | 0        | 0        | 0.060822 | 0.039093 |
| 0.941087 | 0.930036 | 0.668009 | 0.94861  | 0.939402 | 0.875105 | 0.922736 | 0.934578 | 0.852461 |
| 0.027516 | 0.021579 | 0.022569 | 0.02357  | 0.015133 | 0.021192 | 0.029345 | 0.019367 | 0.019456 |
| 0        | 0        | 0        | 0        | 0        | 0        | 0        | 0        | 0        |
| 0.39607  | 0.317505 | 0.08873  | 0.350417 | 0.182772 | 0.581034 | 0.879169 | 0.238315 | 0.621014 |
| 0.050715 | 0.054967 | 0.021492 | 0.129947 | 0.114321 | 0.056968 | 0.097334 | 0.045179 | 0.024227 |
| 0.014755 | 0.01229  | 0.015768 | 0.016287 | 0.012256 | 0.01427  | 0.013728 | 0.013157 | 0.010824 |
| 0.064292 | 0.162479 | 0.252023 | 0.106156 | 0.143442 | 0.377813 | 0        | 0.250051 | 0.084594 |
| 0.149417 | 0.172866 | 0.083936 | 0.140662 | 0.095902 | 0.222226 | 0.192045 | 0.058683 | 0.159649 |
| 0.080165 | 0.07445  | 0.034178 | 0.071515 | 0.066399 | 0.146658 | 0.1209   | 0.07465  | 0.056471 |
| 0.024056 | 0.039108 | 0.117188 | 0.04894  | 0.052575 | 0        | 0        | 0.08686  | 0.024634 |
| 0.056847 | 0.045973 | 0.037203 | 0.050883 | 0.052177 | 0.137366 | 0.098466 | 0.046823 | 0.055506 |
| 0        | 0        | 0        | 0        | 0        | 0        | 0        | 0        | 0        |
| 0        | 0        | 0        | 0        | 0        | 0        | 0        | 0        | 0        |
| 0        | 0        | 0        | 0        | 0        | 0        | 0        | 0        | 0        |
| 0.081984 | 0.077697 | 0.021492 | 0.06436  | 0.04414  | 0.139863 | 0.145637 | 0.02873  | 0.072189 |
| 0.0407   | 0.041302 | 0.078984 | 0.059719 | 0.061562 | 0        | 0        | 0.076781 | 0.043738 |
| 0.046169 | 0.033106 | 0.024844 | 0.031226 | 0.028125 | 0.039485 | 0.043209 | 0.029917 | 0.04873  |
| 0.093974 | 0.24507  | 0        | 0.146292 | 0.270156 | 0        | 0        | 0.354659 | 0.075948 |
| 0.075121 | 0.112383 | 0.040439 | 0.15864  | 0.171726 | 0.168615 | 0.146572 | 0.074407 | 0.043147 |
| 0.117181 | 0.035213 | 0.024684 | 0.122926 | 0.03873  | 0.030669 | 0.034517 | 0.049011 | 0.097811 |
| 0.301874 | 0.398948 | 0.072296 | 0.168636 | 0.185611 | 0.186834 | 0.213953 | 0.101669 | 0.228002 |
| 0.107503 | 0.08215  | 0.079926 | 0.108752 | 0.099146 | 0.091396 | 0.093094 | 0.079071 | 0.094034 |
| 0.093824 | 0.076149 | 0.044555 | 0.06454  | 0.065711 | 0.159618 | 0.120821 | 0.053817 | 0.055725 |
| 0.63302  | 0.642777 | 0.390114 | 0.67046  | 0.775989 | 0.690215 | 0.330314 | 0.440194 | 0.467753 |
| 0.22904  | 0.330324 | 0.082134 | 0.207018 | 0.180861 | 0.329119 | 0.25168  | 0.118009 | 0.247159 |
| 0.326003 | 0.089936 | 0.015315 | 0.321195 | 0.031575 | 0.476715 | 0.295246 | 0.206407 | 0.090728 |
| 0.053923 | 0.033958 | 0.035472 | 0.092034 | 0.03762  | 0.0345   | 0.044114 | 0.039223 | 0.032808 |
| 0.419666 | 0.318368 | 0.09869  | 0.34488  | 0.417908 | 0.415155 | 0.30701  | 0.160843 | 0.28207  |
| 0.550121 | 0.22291  | 0.027803 | 0.753832 | 0.178274 | 0.57282  | 0.416421 | 0.617055 | 0.132242 |
| 0.026769 | 0.022882 | 0.015512 | 0.020754 | 0.019167 | 0.018881 | 0.023107 | 0.015001 | 0.032804 |
| 0.103055 | 0.147644 | 0.093711 | 0.101141 | 0.118188 | 0.096842 | 0.096806 | 0.072266 | 0.100942 |
| 0.152523 | 0.536426 | 0.057498 | 0.460976 | 0.676317 | 0.231708 | 0.158595 | 0.490053 | 0.145804 |
| 0.038322 | 0.029363 | 0.024075 | 0.055412 | 0.025129 | 0.022521 | 0.023692 | 0.030152 | 0.030018 |
| 0        | 0        | 0        | 0        | 0        | 0        | 0        | 0        | 0        |
| 0.059638 | 0.071955 | 0.044945 | 0.064466 | 0.056225 | 0.055476 | 0.064033 | 0.04472  | 0.060972 |
| 0.436586 | 0.370022 | 0.167976 | 0.408926 | 0.231347 | 0.593932 | 0.878086 | 0.288397 | 0.684164 |
| 0.052853 | 0.024524 | 0.025625 | 0.057312 | 0.03913  | 0.060051 | 0.067253 | 0.034144 | 0.045412 |
| 0.087511 | 0.069962 | 0.05441  | 0.060955 | 0.059947 | 0.071726 | 0.068999 | 0.080415 | 0.07677  |
| 0.742434 | 0.589601 | 0.206215 | 0.72545  | 0.429827 | 0.756379 | 0.739743 | 0.638749 | 0.522006 |
| 0.014503 | 0.009927 | 0.012556 | 0.013943 | 0.012603 | 0.015162 | 0.010449 | 0.013604 | 0.010303 |
| 0.196595 | 0.37426  | 0.086679 | 0.272699 | 0.174147 | 0.283721 | 0.296063 | 0.132164 | 0.228935 |
| 0.095792 | 0.10207  | 0.024096 | 0.087204 | 0.050636 | 0.133877 | 0.149573 | 0.045039 | 0.068434 |
| 0.642652 | 0.690124 | 0.379098 | 0.578935 | 0.527532 | 0.731408 | 0.751416 | 0.513592 | 0.618217 |
| 0.160825 | 0.130221 | 0.039955 | 0.197847 | 0.10124  | 0.346407 | 0.320664 | 0.127806 | 0.155291 |
| 0.08275  | 0.057028 | 0.043134 | 0.071335 | 0.045789 | 0.097184 | 0.08333  | 0.049836 | 0.084937 |

| TCGA. HE. A | TCGA. SX. A | TCGA. DW. 7 | TCGA. IA. A | TCGA. 5P. A | TCGA. GL. A | TCGA. A4. A | TCGA. 5P. A | TCGA. 2Z. A |
|-------------|-------------|-------------|-------------|-------------|-------------|-------------|-------------|-------------|
| 0.051233    | 0.062431    | 0.041396    | 0.045337    | 0.044423    | 0.250596    | 0.044363    | 0.045875    | 0.047064    |
| 0.051398    | 0.18344     | 0.045356    | 0.059586    | 0           | 0           | 0.068766    | 0.046978    | 0.100683    |
| 0.941839    | 0.748295    | 0.914612    | 0.887255    | 0.906329    | 0.90492     | 0.504589    | 0.920524    | 0.793983    |
| 0.048982    | 0.021093    | 0.028183    | 0.021276    | 0.01976     | 0.012356    | 0.017592    | 0.017334    | 0.027161    |
| 0           | 0           | 0           | 0           | 0           | 0           | 0           | 0           | 0           |
| 0.66329     | 0.111026    | 0.640948    | 0.234367    | 0.368874    | 0.089675    | 0.22411     | 0.427037    | 0.258327    |
| 0.065044    | 0.176658    | 0.031979    | 0.045927    | 0.089148    | 0.051531    | 0.045708    | 0.032565    | 0.128375    |
| 0.01968     | 0.012442    | 0.01454     | 0.019814    | 0.017281    | 0.010369    | 0.013148    | 0.016199    | 0.015093    |
| 0.153377    | 0.280558    | 0.069095    | 0.130919    | 0           | 0           | 0.158374    | 0.125832    | 0.224178    |
| 0.244388    | 0.102564    | 0.186825    | 0.064322    | 0.070253    | 0.031059    | 0.104874    | 0.118922    | 0.150691    |
| 0.088875    | 0.082174    | 0.074283    | 0.09128     | 0.211933    | 0.060881    | 0.052755    | 0.04619     | 0.07289     |
| 0.04438     | 0.109815    | 0.026379    | 0.060451    | 0           | 0           | 0.060865    | 0.042       | 0.055052    |
| 0.064599    | 0.053912    | 0.068554    | 0.046102    | 0.061717    | 0.036715    | 0.049254    | 0.057088    | 0.057385    |
| 0           | 0           | 0           | 0           | 0           | 0           | 0           | 0           | 0           |
| 0           | 0           | 0           | 0           | 0           | 0           | 0           | 0           | 0           |
| 0           | 0           | 0           | 0           | 0           | 0           | 0           | 0           | 0           |
| 0.094934    | 0.074732    | 0.09216     | 0.085415    | 0.031248    | 0.020681    | 0.03122     | 0.047565    | 0.083663    |
| 0.059253    | 0.070815    | 0.054695    | 0.053288    | 0           | 0           | 0.074846    | 0.047185    | 0.055718    |
| 0.036104    | 0.046213    | 0.040222    | 0.024792    | 0.028113    | 0.032173    | 0.028639    | 0.032213    | 0.029044    |
| 0.193331    | 0.34651     | 0.094279    | 0.174325    | 0           | 0           | 0.270927    | 0.206481    | 0.290061    |
| 0.100628    | 0.195116    | 0.094898    | 0.09625     | 0.366598    | 0.138449    | 0.107383    | 0.042636    | 0.149477    |
| 0.057616    | 0.045204    | 0.029665    | 0.026009    | 0.025462    | 0.308081    | 0.02814     | 0.040712    | 0.169656    |
| 0.341848    | 0.160413    | 0.228196    | 0.097532    | 0.097369    | 0.187467    | 0.065502    | 0.218437    | 0.232634    |
| 0.106954    | 0.073209    | 0.085429    | 0.064331    | 0.07252     | 0.087366    | 0.078879    | 0.074675    | 0.087978    |
| 0.074726    | 0.090293    | 0.103366    | 0.076692    | 0.239986    | 0.058958    | 0.036725    | 0.066193    | 0.073025    |
| 0.617079    | 0.363172    | 0.375637    | 0.17374     | 0.771967    | 0.336077    | 0.329165    | 0.388531    | 0.751968    |
| 0.29623     | 0.125343    | 0.294301    | 0.127197    | 0.126722    | 0.073814    | 0.130068    | 0.246952    | 0.297939    |
| 0.175857    | 0.023223    | 0.13482     | 0.039598    | 0.475015    | 0.75869     | 0.113532    | 0.083682    | 0.066603    |
| 0.052486    | 0.03663     | 0.044385    | 0.029006    | 0.032049    | 0.219072    | 0.047488    | 0.039759    | 0.045371    |
| 0.408487    | 0.247077    | 0.351953    | 0.11724     | 0.646895    | 0.162394    | 0.171406    | 0.190671    | 0.734525    |
| 0.388954    | 0.028867    | 0.226205    | 0.046503    | 0.57538     | 0.914347    | 0.156604    | 0.397316    | 0.060998    |
| 0.021255    | 0.015576    | 0.018727    | 0.016875    | 0.015741    | 0.009425    | 0.017645    | 0.012856    | 0.015711    |
| 0.092233    | 0.108966    | 0.130105    | 0.1518      | 0.103751    | 0.232895    | 0.078354    | 0.11082     | 0.087022    |
| 0.212314    | 0.534729    | 0.07957     | 0.052051    | 0.453402    | 0.465011    | 0.467317    | 0.145489    | 0.266371    |
| 0.038359    | 0.043129    | 0.026987    | 0.031907    | 0.023651    | 0.135277    | 0.027906    | 0.030717    | 0.038177    |
| 0           | 0           | 0           | 0           | 0           | 0           | 0           | 0           | 0           |
| 0.075265    | 0.061427    | 0.057427    | 0.042576    | 0.034525    | 0.067233    | 0.066438    | 0.047285    | 0.06673     |
| 0.671381    | 0.23524     | 0.607567    | 0.329784    | 0.4004      | 0.154393    | 0.293635    | 0.488004    | 0.287019    |
| 0.058872    | 0.053583    | 0.078778    | 0.050287    | 0.264425    | 0.023665    | 0.030194    | 0.03186     | 0.024399    |
| 0.097353    | 0.048882    | 0.090638    | 0.056377    | 0.067916    | 0.054879    | 0.065835    | 0.067917    | 0.06988     |
| 0.620578    | 0.301958    | 0.513758    | 0.307424    | 0.734539    | 0.930362    | 0.442566    | 0.677782    | 0.321043    |
| 0.016398    | 0.013081    | 0.013527    | 0.014072    | 0.016296    | 0.010794    | 0.012776    | 0.014334    | 0.014124    |
| 0.207505    | 0.126817    | 0.297533    | 0.11605     | 0.093077    | 0.058215    | 0.125579    | 0.326877    | 0.230228    |
| 0.079906    | 0.071037    | 0.084062    | 0.075985    | 0.043361    | 0.02321     | 0.06211     | 0.055446    | 0.081811    |
| 0.656448    | 0.421599    | 0.581197    | 0.465168    | 0.763401    | 0.929261    | 0.531961    | 0.546608    | 0.433114    |
| 0.243399    | 0.080181    | 0.311861    | 0.108713    | 0.083744    | 0.042381    | 0.089552    | 0.098275    | 0.112895    |
| 0.103244    | 0.031788    | 0.093584    | 0.049371    | 0.04628     | 0.031811    | 0.049915    | 0.066622    | 0.050426    |

| TCGA. A4. 7 | TCGA. G7. 6 | TCGA. HE. 7 | TCGA. B1. 7 | TCGA. A4. 7 | TCGA. UZ. 7 | TCGA. DW. 7 | TCGA. P4. 7 | TCGA. Q2. 7 |
|-------------|-------------|-------------|-------------|-------------|-------------|-------------|-------------|-------------|
| 0.069841    | 0.045643    | 0.064429    | 0.031986    | 0.367626    | 0.221325    | 0.049499    | 0.041756    | 0.046288    |
| 0           | 0.410536    | 0.373552    | 0.15861     | 0           | 0           | 0           | 0.06019     | 0           |
| 0.88749     | 0.891869    | 0.954494    | 0.772212    | 0.882742    | 0.941869    | 0.949624    | 0.870386    | 0.921272    |
| 0.03233     | 0.025001    | 0.017958    | 0.0154      | 0.036122    | 0.021268    | 0.039721    | 0.019993    | 0.029788    |
| 0           | 0           | 0           | 0           | 0           | 0           | 0           | 0           | 0           |
| 0.409736    | 0.175877    | 0.06456     | 0.109458    | 0.449136    | 0.16223     | 0.043367    | 0.220526    | 0.333839    |
| 0.269923    | 0.035839    | 0.116875    | 0.133706    | 0.085349    | 0.036661    | 0.085657    | 0.353436    | 0.090593    |
| 0.013121    | 0.013555    | 0.016845    | 0.019137    | 0.015331    | 0.014023    | 0.015489    | 0.013875    | 0.016037    |
| 0           | 0           | 0           | 0.125957    | 0           | 0           | 0           | 0.145959    | 0           |
| 0.16455     | 0.138406    | 0.092813    | 0.051604    | 0.111617    | 0.104304    | 0.114316    | 0.119187    | 0.132889    |
| 0.130695    | 0.213212    | 0.097907    | 0.101114    | 0.245619    | 0.055653    | 0.28581     | 0.257081    | 0.21293     |
| 0.469201    | 0           | 0.266905    | 0.053166    | 0           | 0           | 0           | 0.056636    | 0           |
| 0.058716    | 0.038187    | 0.041909    | 0.035094    | 0.059872    | 0.042348    | 0.037006    | 0.051975    | 0.047109    |
| 0           | 0           | 0           | 0           | 0           | 0           | 0           | 0           | 0           |
| 0           | 0           | 0           | 0           | 0           | 0           | 0           | 0           | 0           |
| 0           | 0           | 0           | 0           | 0           | 0           | 0           | 0           | 0           |
| 0.094812    | 0.052106    | 0.039836    | 0.032133    | 0.051757    | 0.033755    | 0.032774    | 0.054788    | 0.03297     |
| 0           | 0           | 0.170471    | 0.060009    | 0           | 0           | 0           | 0.063339    | 0           |
| 0.042485    | 0.037479    | 0.022346    | 0.036409    | 0.038461    | 0.027164    | 0.040257    | 0.046883    | 0.031318    |
| 0           | 0           | 0           | 0.341317    | 0           | 0           | 0           | 0.24991     | 0           |
| 0.33982     | 0.074022    | 0.202438    | 0.194908    | 0.174035    | 0.093404    | 0.166583    | 0.367925    | 0.097535    |
| 0.136964    | 0.0322      | 0.037332    | 0.029036    | 0.396901    | 0.397511    | 0.340834    | 0.036561    | 0.287382    |
| 0.179849    | 0.113578    | 0.091156    | 0.121873    | 0.077263    | 0.143971    | 0.205251    | 0.106743    | 0.113534    |
| 0.095343    | 0.096363    | 0.100531    | 0.084159    | 0.102197    | 0.082454    | 0.09283     | 0.096422    | 0.114491    |
| 0.120597    | 0.188569    | 0.101424    | 0.11012     | 0.237115    | 0.046902    | 0.225676    | 0.298558    | 0.194757    |
| 0.432809    | 0.359678    | 0.671943    | 0.293327    | 0.279414    | 0.788465    | 0.188568    | 0.845985    | 0.738814    |
| 0.217144    | 0.146442    | 0.061071    | 0.117219    | 0.11292     | 0.141205    | 0.077585    | 0.210321    | 0.127601    |
| 0.035563    | 0.655955    | 0.01869     | 0.025715    | 0.599561    | 0.741094    | 0.639345    | 0.036747    | 0.620298    |
| 0.051804    | 0.050294    | 0.053949    | 0.040717    | 0.342671    | 0.108817    | 0.04734     | 0.032633    | 0.045368    |
| 0.197352    | 0.205236    | 0.24373     | 0.154869    | 0.200453    | 0.26443     | 0.085154    | 0.578666    | 0.478342    |
| 0.302165    | 0.685668    | 0.472089    | 0.033667    | 0.578767    | 0.824271    | 0.970359    | 0.037092    | 0.643903    |
| 0.016895    | 0.014785    | 0.013725    | 0.01738     | 0.017936    | 0.013967    | 0.015966    | 0.013964    | 0.018841    |
| 0.099102    | 0.118698    | 0.155755    | 0.10672     | 0.071301    | 0.081189    | 0.09422     | 0.091855    | 0.088059    |
| 0.696077    | 0.085022    | 0.668617    | 0.482932    | 0.141662    | 0.477926    | 0.389805    | 0.669252    | 0.090405    |
| 0.027452    | 0.03383     | 0.029791    | 0.026635    | 0.135688    | 0.069411    | 0.032359    | 0.032559    | 0.0275      |
| 0           | 0           | 0           | 0           | 0           | 0           | 0           | 0           | 0           |
| 0.063397    | 0.049352    | 0.04875     | 0.043451    | 0.059336    | 0.069981    | 0.064162    | 0.045555    | 0.053965    |
| 0.474054    | 0.236716    | 0.094907    | 0.193733    |             |             |             |             |             |

| TCGA. KV. A | TCGA. Y8. A | TCGA. MH. A | TCGA. BQ. E | TCGA. Y8. A | TCGA. PJ. A | TCGA. B9. E | TCGA. B9. A | TCGA. BQ. 7 |
|-------------|-------------|-------------|-------------|-------------|-------------|-------------|-------------|-------------|
| 0.096582    | 0.04647     | 0.04258     | 0.474968    | 0.273231    | 0.053103    | 0.290206    | 0.046791    | 0.049391    |
| 0.079411    | 0.102421    | 0.028795    | 0           | 0           | 0           | 0.237844    | 0.136959    | 0           |
| 0.683534    | 0.853631    | 0.934801    | 0.896766    | 0.877668    | 0.918502    | 0.955504    | 0.699455    | 0.948912    |
| 0.01524     | 0.015021    | 0.046743    | 0.044234    | 0.017279    | 0.030107    | 0.022853    | 0.018784    | 0.036663    |
| 0           | 0           | 0           | 0           | 0           | 0           | 0           | 0           | 0           |
| 0.223568    | 0.183236    | 0.269542    | 0.44049     | 0.376113    | 0.52515     | 0.086565    | 0.166932    | 0.156071    |
| 0.071607    | 0.150455    | 0.044256    | 0.076537    | 0.321971    | 0.171147    | 0.217319    | 0.372908    | 0.055948    |
| 0.012703    | 0.011238    | 0.019365    | 0.019016    | 0.012709    | 0.015144    | 0.013429    | 0.012338    | 0.015383    |
| 0.168626    | 0.263641    | 0.054003    | 0           | 0.488405    | 0           | 0           | 0.305423    | 0           |
| 0.1392      | 0.080581    | 0.193429    | 0.301473    | 0.06149     | 0.221623    | 0.104125    | 0.073996    | 0.123088    |
| 0.055687    | 0.117223    | 0.121396    | 0.12985     | 0.102957    | 0.090366    | 0.072811    | 0.063689    | 0.12653     |
| 0.073752    | 0.08417     | 0.037224    | 0           | 0           | 0           | 0.194209    | 0.119037    | 0           |
| 0.054536    | 0.050165    | 0.045074    | 0.056369    | 0.065401    | 0.05177     | 0.052935    | 0.042914    | 0.044469    |
| 0           | 0           | 0           | 0           | 0           | 0           | 0           | 0           | 0           |
| 0           | 0           | 0           | 0           | 0           | 0           | 0           | 0           | 0           |
| 0           | 0           | 0           | 0           | 0           | 0           | 0           | 0           | 0           |
| 0.099319    | 0.068018    | 0.029764    | 0.376715    | 0.087327    | 0.086381    | 0.047121    | 0.02503     | 0.038052    |
| 0.083703    | 0.042586    | 0.054151    | 0           | 0           | 0           | 0.080386    | 0.064248    | 0           |
| 0.032636    | 0.025838    | 0.034087    | 0.569512    | 0.053514    | 0.039165    | 0.035668    | 0.035718    | 0.026149    |
| 0.232207    | 0           | 0.083204    | 0           | 0           | 0           | 0           | 0.293136    | 0           |
| 0.113473    | 0.256515    | 0.092096    | 0.139675    | 0.355595    | 0.325539    | 0.259981    | 0.429669    | 0.104192    |
| 0.262109    | 0.241416    | 0.042188    | 0.482531    | 0.372091    | 0.067815    | 0.530155    | 0.097074    | 0.038125    |
| 0.135809    | 0.217895    | 0.185539    | 0.411432    | 0.261468    | 0.320753    | 0.069728    | 0.221673    | 0.116241    |
| 0.089266    | 0.084987    | 0.096757    | 0.10491     | 0.110502    | 0.098405    | 0.109336    | 0.090246    | 0.105963    |
| 0.050019    | 0.188433    | 0.114701    | 0.141276    | 0.090116    | 0.085233    | 0.07232     | 0.056188    | 0.125534    |
| 0.468075    | 0.468649    | 0.453771    | 0.332994    | 0.38839     | 0.679996    | 0.445171    | 0.787185    | 0.721173    |
| 0.165483    | 0.137331    | 0.129381    | 0.463406    | 0.221589    | 0.314818    | 0.082427    | 0.090813    | 0.114305    |
| 0.047897    | 0.012617    | 0.133216    | 0.535023    | 0.055448    | 0.203184    | 0.471661    | 0.016359    | 0.5659      |
| 0.04209     | 0.036438    | 0.040123    | 0.520868    | 0.201641    | 0.068669    | 0.219545    | 0.038678    | 0.035477    |
| 0.106698    | 0.162558    | 0.238302    | 0.190649    | 0.238115    | 0.607216    | 0.151197    | 0.525056    | 0.415381    |
| 0.079904    | 0.028064    | 0.640593    | 0.577951    | 0.277692    | 0.314194    | 0.846127    | 0.161824    | 0.802398    |
| 0.021859    | 0.010793    | 0.018488    | 0.542393    | 0.019055    | 0.016247    | 0.0122      | 0.011307    | 0.014504    |
| 0.084231    | 0.210057    | 0.084695    | 0.47291     | 0.068323    | 0.086425    | 0.100919    | 0.259105    | 0.139621    |
| 0.494859    | 0.693026    | 0.429845    | 0.126761    | 0.627292    | 0.365094    | 0.648263    | 0.875977    | 0.201931    |
| 0.032157    | 0.038253    | 0.031296    | 0.418459    | 0.155093    | 0.026814    | 0.206585    | 0.028879    | 0.025162    |
| 0           | 0           | 0           | 0           | 0           | 0           | 0           | 0           | 0           |
| 0.055408    | 0.053125    | 0.053528    | 0.530865    | 0.057736    | 0.060011    | 0.069816    | 0.042322    | 0.061502    |
| 0.283229    | 0.272515    | 0.325841    | 0.611403    | 0.412457    | 0.51175     | 0.130034    | 0.23458     | 0.216224    |
| 0.055267    | 0.024385    | 0.0488      | 0.043778    | 0.049169    | 0.081821    | 0.042459    | 0.035012    | 0.105755    |
| 0.068721    | 0.051365    | 0.069114    | 0.523957    | 0.070264    | 0.068702    | 0.068099    | 0.050873    | 0.06661     |
| 0.365796    | 0.248008    | 0.433442    | 0.672994    | 0.491239    | 0.637944    | 0.643945    | 0.244023    | 0.765967    |
| 0.014755    | 0.012561    | 0.017078    | 0.013963    | 0.012673    | 0.014305    | 0.013389    | 0.011667    | 0.011991    |
| 0.193218    | 0.168633    | 0.200359    | 0.491838    | 0.186764    | 0.27954     | 0.055705    | 0.088451    | 0.095964    |
| 0.05491     | 0.056929    | 0.044761    | 0.374445    | 0.0828      | 0.094318    | 0.052527    | 0.038871    | 0.058236    |
| 0.486599    | 0.463385    | 0.473067    | 0.732924    | 0.467305    | 0.675355    | 0.290925    | 0.393929    | 0.679073    |
| 0.138004    | 0.066499    | 0.092515    | 0.11964     | 0.140218    | 0.231084    | 0.045756    | 0.064293    | 0.049026    |
| 0.056858    | 0.042556    | 0.045117    | 0.054226    | 0.06471     | 0.112243    | 0.042919    | 0.045624    | 0.064677    |

TCGA. 5P. ^TCGA. GL. ^TCGA. MH. ^TCGA. AL. ^TCGA. 2Z. ^TCGA. DW. ^TCGA. GL. ^TCGA. 5P. ^TCGA. 2Z. ^

|          |          |          |          |          |          |          |          |          |
|----------|----------|----------|----------|----------|----------|----------|----------|----------|
| 0.033653 | 0.042703 | 0.054329 | 0.134063 | 0.039393 | 0.061377 | 0.063115 | 0.054467 | 0.280232 |
| 0.041323 | 0.15049  | 0        | 0        | 0.143241 | 0.244383 | 0.129724 | 0.045663 | 0.022184 |
| 0.905257 | 0.628348 | 0.927532 | 0.866236 | 0.939608 | 0.281189 | 0.935672 | 0.770486 | 0.911792 |
| 0.024322 | 0.033057 | 0.02061  | 0.028786 | 0.018379 | 0.024741 | 0.020157 | 0.021958 | 0.027099 |
| 0        | 0        | 0        | 0        | 0        | 0        | 0        | 0        | 0        |
| 0.267431 | 0.163357 | 0.416735 | 0.360586 | 0.083456 | 0.087099 | 0.130267 | 0.289762 | 0.554232 |
| 0.033297 | 0.207769 | 0.112479 | 0.040364 | 0.163794 | 0.262777 | 0.21957  | 0.087489 | 0.034047 |
| 0.016318 | 0.014936 | 0.016562 | 0.014197 | 0.015438 | 0.014996 | 0.017494 | 0.014847 | 0.0146   |
| 0.111125 | 0.21989  | 0        | 0        | 0.236733 | 0.361459 | 0.235342 | 0.110351 | 0.051894 |
| 0.113683 | 0.136693 | 0.234295 | 0.216543 | 0.102125 | 0.122549 | 0.126799 | 0.085745 | 0.212131 |
| 0.089862 | 0.072323 | 0.095056 | 0.105956 | 0.081501 | 0.084275 | 0.058551 | 0.117761 | 0.053001 |
| 0.036068 | 0.093073 | 0        | 0        | 0.068889 | 0.165261 | 0.074158 | 0.043399 | 0.027093 |
| 0.052506 | 0.030159 | 0.059156 | 0.052154 | 0.043743 | 0.043321 | 0.043969 | 0.059336 | 0.046641 |
| 0        | 0        | 0        | 0        | 0        | 0        | 0        | 0        | 0        |
| 0        | 0        | 0        | 0        | 0        | 0        | 0        | 0        | 0        |
| 0        | 0        | 0        | 0        | 0        | 0        | 0        | 0        | 0        |
| 0.059242 | 0.029543 | 0.103045 | 0.110639 | 0.036407 | 0.050164 | 0.043073 | 0.043079 | 0.062248 |
| 0.053675 | 0.07547  | 0        | 0        | 0.073405 | 0.103443 | 0.086657 | 0.04921  | 0.04184  |
| 0.047053 | 0.029202 | 0.046492 | 0.031174 | 0.029814 | 0.044229 | 0.026762 | 0.028085 | 0.029638 |
| 0.204637 | 0.396394 | 0        | 0        | 0.415233 | 0        | 0.415816 | 0.267778 | 0.092761 |
| 0.041694 | 0.275356 | 0.195967 | 0.118678 | 0.217515 | 0.280157 | 0.22788  | 0.147192 | 0.09599  |
| 0.027943 | 0.029363 | 0.043076 | 0.159022 | 0.060323 | 0.078355 | 0.291928 | 0.045622 | 0.470526 |
| 0.119666 | 0.112347 | 0.422662 | 0.273078 | 0.239773 | 0.11137  | 0.077162 | 0.128139 | 0.286341 |
| 0.096931 | 0.090537 | 0.083288 | 0.093672 | 0.089297 | 0.081221 | 0.090676 | 0.07143  | 0.091417 |
| 0.09734  | 0.072914 | 0.083901 | 0.112917 | 0.07715  | 0.071907 | 0.060622 | 0.1146   | 0.054542 |
| 0.25519  | 0.336232 | 0.796183 | 0.642574 | 0.755318 | 0.486416 | 0.659843 | 0.444824 | 0.608336 |
| 0.177629 | 0.099264 | 0.358646 | 0.269009 | 0.174132 | 0.098384 | 0.087039 | 0.170855 | 0.35346  |
| 0.024939 | 0.037335 | 0.27344  | 0.453369 | 0.435066 | 0.017153 | 0.085671 | 0.027239 | 0.47145  |
| 0.032604 | 0.040895 | 0.043205 | 0.12127  | 0.040691 | 0.060904 | 0.040558 | 0.041538 | 0.284298 |
| 0.179563 | 0.125514 | 0.713827 | 0.27677  | 0.572285 | 0.311052 | 0.359375 | 0.308857 | 0.407895 |
| 0.125708 | 0.207309 | 0.742018 | 0.53747  | 0.740592 | 0.019872 | 0.825907 | 0.035128 | 0.536102 |
| 0.019133 | 0.017683 | 0.015191 | 0.021595 | 0.011758 | 0.01609  | 0.012588 | 0.013419 | 0.017212 |
| 0.068049 | 0.079893 | 0.132905 | 0.082319 | 0.136162 | 0.116418 | 0.061241 | 0.122329 | 0.11071  |
| 0.057786 | 0.675343 | 0.519064 | 0.111708 | 0.644658 | 0.661764 | 0.48459  | 0.408695 | 0.125074 |
| 0.02385  | 0.023791 | 0.024455 | 0.070211 | 0.035449 | 0.029742 | 0.023452 | 0.035058 | 0.217711 |
| 0        | 0        | 0        | 0        | 0        | 0        | 0        | 0        | 0        |
| 0.061721 | 0.059014 | 0.054089 | 0.068848 | 0.050303 | 0.068301 | 0.064001 | 0.056338 | 0.049172 |
| 0.354803 | 0.21483  | 0.444424 | 0.402443 | 0.150452 | 0.129939 | 0.177627 | 0.351478 | 0.571747 |
| 0.033527 | 0.027616 | 0.088641 | 0.047092 | 0.054521 | 0.042285 | 0.027724 | 0.026731 | 0.033608 |
| 0.079379 | 0.072325 | 0.084049 | 0.072576 | 0.064303 | 0.059342 | 0.078809 | 0.070098 | 0.070166 |
| 0.358982 | 0.370281 | 0.737267 | 0.759452 | 0.754792 | 0.114578 | 0.35852  | 0.352239 | 0.744048 |
| 0.016033 | 0.013363 | 0.014085 | 0.011023 | 0.013834 | 0.013263 | 0.012847 | 0.014024 | 0.013785 |
| 0.211388 | 0.101006 | 0.468291 | 0.316828 | 0.222838 | 0.168421 | 0.07101  | 0.269185 | 0.298575 |
| 0.062883 | 0.030842 | 0.119352 | 0.123489 | 0.053993 | 0.086276 | 0.05994  | 0.05881  | 0.072304 |
| 0.490104 | 0.471206 | 0.563187 | 0.803749 | 0.651503 | 0.247109 | 0.412344 | 0.486916 | 0.941594 |
| 0.127439 | 0.042778 | 0.249095 | 0.250558 | 0.057192 | 0.048429 | 0.068201 | 0.148989 | 0.276829 |
| 0.065665 | 0.048167 | 0.046731 | 0.066054 | 0.048575 | 0.053442 | 0.050305 | 0.056296 | 0.095136 |

TCGA. A4. 8 TCGA. BQ. 7 TCGA. PJ. 9 TCGA. SX. 9 TCGA. O9. 9 TCGA. B9. 9 TCGA. 2Z. 9 TCGA. BQ. 5 TCGA. Y8. 9

|          |          |          |          |          |          |          |          |          |
|----------|----------|----------|----------|----------|----------|----------|----------|----------|
| 0.049217 | 0.060599 | 0.376217 | 0.054967 | 0.05996  | 0.052029 | 0.051092 | 0.545731 | 0.048512 |
| 0.208235 | 0.051529 | 0        | 0.072022 | 0.171095 | 0.037109 | 0.08163  | 0        | 0.125712 |
| 0.94585  | 0.942463 | 0.954659 | 0.940097 | 0.429655 | 0.845083 | 0.923389 | 0.938656 | 0.75157  |
| 0.025132 | 0.025952 | 0.030509 | 0.01463  | 0.034688 | 0.020594 | 0.021299 | 0.024078 | 0.016686 |
| 0        | 0        | 0        | 0        | 0        | 0        | 0        | 0        | 0        |
| 0.152417 | 0.40294  | 0.145724 | 0.225157 | 0.197463 | 0.379049 | 0.156366 | 0.280727 | 0.214435 |
| 0.145388 | 0.050004 | 0.241998 | 0.040267 | 0.048467 | 0.05961  | 0.145561 | 0.043023 | 0.023942 |
| 0.014969 | 0.012404 | 0.014765 | 0.011469 | 0.014824 | 0.013585 | 0.012422 | 0.016783 | 0.013141 |
| 0.227993 | 0.080831 | 0        | 0.12001  | 0.273213 | 0.048503 | 0.23988  | 0        | 0.25253  |
| 0.088966 | 0.153772 | 0.14415  | 0.092703 | 0.166466 | 0.4123   | 0.090767 | 0.108806 | 0.073296 |
| 0.07673  | 0.077191 | 0.08136  | 0.062527 | 0.109826 | 0.12261  | 0.069677 | 0.129627 | 0.044325 |
| 0.107989 | 0.035501 | 0        | 0.054654 | 0.084511 | 0.057325 | 0.081686 | 0        | 0.133026 |
| 0.054394 | 0.046982 | 0.049831 | 0.040411 | 0.045282 | 0.062442 | 0.032687 | 0.062193 | 0.033086 |
| 0        | 0        | 0        | 0        | 0        | 0        | 0        | 0        | 0        |
| 0        | 0        | 0        | 0        | 0        | 0        | 0        | 0        | 0        |
| 0        | 0        | 0        | 0        | 0        | 0        | 0        | 0        | 0        |
| 0.036551 | 0.106649 | 0.046231 | 0.089808 | 0.047956 | 0.271356 | 0.029221 | 0.032157 | 0.033796 |
| 0.118934 | 0.053103 | 0        | 0.053889 | 0.065547 | 0.060875 | 0.081353 | 0        | 0.07835  |
| 0.042461 | 0.048661 | 0.028834 | 0.036181 | 0.045472 | 0.222937 | 0.032306 | 0.037557 | 0.029767 |
| 0.276804 | 0.214658 | 0        | 0.211323 | 0.40071  | 0.073048 | 0.389468 | 0        | 0.370792 |
| 0.224484 | 0.074166 | 0.295944 | 0.085835 | 0.082024 | 0.12814  | 0.239925 | 0.072575 | 0.050574 |
| 0.024564 | 0.028566 | 0.528531 | 0.037197 | 0.058119 | 0.040556 | 0.094177 | 0.606911 | 0.395679 |
| 0.100379 | 0.302662 | 0.217376 | 0.224348 | 0.225748 | 0.492563 | 0.090413 | 0.101417 | 0.152931 |
| 0.11397  | 0.096632 | 0.091352 | 0.081726 | 0.096635 | 0.079105 | 0.074438 | 0.119772 | 0.068172 |
| 0.064136 | 0.063797 | 0.078164 | 0.054575 | 0.089458 | 0.130716 | 0.06438  | 0.12273  | 0.051294 |
| 0.691279 | 0.695731 | 0.550973 | 0.372512 | 0.188808 | 0.741175 | 0.228562 | 0.839461 | 0.467414 |
| 0.065013 | 0.214296 | 0.133679 | 0.179383 | 0.133668 | 0.315004 | 0.11293  | 0.11513  | 0.178535 |
| 0.024185 | 0.471756 | 0.263885 | 0.026547 | 0.02658  | 0.123185 | 0.013157 | 0.465564 | 0.027866 |
| 0.034759 | 0.043216 | 0.303237 | 0.047704 | 0.043391 | 0.048922 | 0.037439 | 0.510432 | 0.034285 |
| 0.165082 | 0.357799 | 0.18345  | 0.206879 | 0.171205 | 0.31941  | 0.11636  | 0.700932 | 0.133354 |
| 0.109369 | 0.765648 | 0.778916 | 0.144368 | 0.024087 | 0.237771 | 0.040404 | 0.571932 | 0.098036 |
| 0.017382 | 0.043367 | 0.01475  | 0.015842 | 0.019685 | 0.441234 | 0.016563 | 0.015194 | 0.013917 |
| 0.070787 | 0.131217 | 0.07537  | 0.122998 | 0.104853 | 0.231312 | 0.103416 | 0.140525 | 0.069231 |
| 0.648045 | 0.320152 | 0.680681 | 0.16877  | 0.126988 | 0.123505 | 0.577994 | 0.072343 | 0.173021 |
| 0.022407 | 0.025567 | 0.283613 | 0.045479 | 0.047739 | 0.030084 | 0.031249 | 0.36837  | 0.026248 |
| 0        | 0        | 0        | 0        | 0        | 0        | 0        | 0        | 0        |
| 0.049073 | 0.081325 | 0.053023 | 0.053876 | 0.097364 | 0.342192 | 0.059331 | 0.052592 | 0.041569 |
| 0.174625 | 0.448698 | 0.22945  | 0.31614  | 0.280413 | 0.447523 | 0.217878 | 0.336403 | 0.292252 |
| 0.02914  | 0.038342 | 0.042091 | 0.039595 | 0.034336 | 0.053427 | 0.029822 | 0.045118 | 0.023052 |
| 0.073778 | 0.087928 | 0.076458 | 0.056971 | 0.073615 | 0.319015 | 0.078947 | 0.056464 | 0.062265 |
| 0.296954 | 0.858241 | 0.531003 | 0.362091 | 0.227438 | 0.577265 | 0.208887 | 0.819743 | 0.315006 |
| 0.015379 | 0.013273 | 0.013101 | 0.013245 | 0.015241 | 0.01287  | 0.013707 | 0.01411  | 0.014996 |
| 0.139884 | 0.196587 | 0.146575 | 0.183769 | 0.115916 | 0.375894 | 0.250494 | 0.086417 | 0.183383 |
| 0.051362 | 0.095751 | 0.054468 | 0.066211 | 0.05328  | 0.259455 | 0.031994 | 0.047087 | 0.040446 |
| 0.38459  | 0.676657 | 0.472936 | 0.506446 | 0.435716 | 0.687446 | 0.379418 | 0.8394   | 0.429119 |
| 0.032227 | 0.136726 | 0.084345 | 0.103545 | 0.093171 | 0.175492 | 0.078638 | 0.081819 | 0.105335 |
| 0.045324 | 0.077578 | 0.054029 | 0.05725  | 0.054999 | 0.057778 | 0.040613 | 0.05408  | 0.039194 |

| TCGA. B1. A | TCGA. 5P. A | TCGA. BQ. E | TCGA. B3. E | TCGA. UN. A | TCGA. 2Z. A | TCGA. A4. 7 | TCGA. BQ. 7 | TCGA. DZ. E |
|-------------|-------------|-------------|-------------|-------------|-------------|-------------|-------------|-------------|
| 0.051194    | 0.07658     | 0.225881    | 0.070324    | 0.049159    | 0.387843    | 0.062052    | 0.051515    | 0.166354    |
| 0           | 0.032782    | 0.060166    | 0           | 0           | 0           | 0           | 0.036079    | 0           |
| 0.932104    | 0.92487     | 0.930528    | 0.763114    | 0.941854    | 0.881861    | 0.612267    | 0.178171    | 0.938874    |
| 0.019644    | 0.02569     | 0.017687    | 0.032468    | 0.029899    | 0.020369    | 0.026448    | 0.030278    | 0.030593    |
| 0           | 0           | 0           | 0           | 0           | 0           | 0           | 0           | 0           |
| 0.578024    | 0.282663    | 0.311763    | 0.621026    | 0.136938    | 0.386974    | 0.333815    | 0.46501     | 0.078063    |
| 0.048229    | 0.236276    | 0.332845    | 0.143846    | 0.317368    | 0.157176    | 0.117517    | 0.284538    | 0.506292    |
| 0.013473    | 0.017224    | 0.015771    | 0.013122    | 0.012515    | 0.017169    | 0.015503    | 0.012913    | 0.012671    |
| 0           | 0.064437    | 0.093042    | 0           | 0           | 0           | 0           | 0.045451    | 0           |
| 0.173193    | 0.101258    | 0.152059    | 0.198049    | 0.097263    | 0.088149    | 0.132106    | 0.116926    | 0.098913    |
| 0.050358    | 0.125246    | 0.117399    | 0.124357    | 0.076212    | 0.145662    | 0.213281    | 0.151853    | 0.05466     |
| 0           | 0.022832    | 0.044412    | 0           | 0           | 0           | 0           | 0.031262    | 0           |
| 0.042161    | 0.038298    | 0.049529    | 0.049641    | 0.050831    | 0.087148    | 0.041319    | 0.071263    | 0.046715    |
| 0           | 0           | 0           | 0           | 0           | 0           | 0           | 0           | 0           |
| 0           | 0           | 0           | 0           | 0           | 0           | 0           | 0           | 0           |
| 0           | 0           | 0           | 0           | 0           | 0           | 0           | 0           | 0           |
| 0.035385    | 0.0412      | 0.074273    | 0.072709    | 0.028433    | 0.043249    | 0.046476    | 0.241779    | 0.045891    |
| 0           | 0.045161    | 0.044345    | 0           | 0.337748    | 0.503621    | 0           | 0.032275    | 0           |
| 0.031706    | 0.0305      | 0.031926    | 0.027835    | 0.022982    | 0.033961    | 0.033471    | 0.044816    | 0.035765    |
| 0           | 0.098103    | 0.216725    | 0           | 0           | 0           | 0           | 0.049422    | 0           |
| 0.08699     | 0.388653    | 0.42591     | 0.169312    | 0.598041    | 0.278511    | 0.183757    | 0.703318    | 0.778401    |
| 0.056002    | 0.101197    | 0.474492    | 0.275652    | 0.038735    | 0.709155    | 0.136326    | 0.027873    | 0.420139    |
| 0.310419    | 0.06885     | 0.173171    | 0.276588    | 0.134594    | 0.175769    | 0.079923    | 0.495678    | 0.07734     |
| 0.082939    | 0.100451    | 0.092645    | 0.099607    | 0.057309    | 0.08002     | 0.087212    | 0.094333    | 0.102819    |
| 0.04836     | 0.132565    | 0.127498    | 0.110284    | 0.060744    | 0.149734    | 0.215541    | 0.159778    | 0.057099    |
| 0.488003    | 0.854215    | 0.857097    | 0.554944    | 0.7841      | 0.712571    | 0.189515    | 0.475986    | 0.682214    |
| 0.279568    | 0.093799    | 0.216179    | 0.344051    | 0.114849    | 0.161847    | 0.152215    | 0.350476    | 0.10928     |
| 0.30962     | 0.682345    | 0.425695    | 0.033777    | 0.070758    | 0.141951    | 0.029001    | 0.013043    | 0.074354    |
| 0.040065    | 0.047395    | 0.169438    | 0.047978    | 0.03405     | 0.328048    | 0.045846    | 0.074291    | 0.138325    |
| 0.270087    | 0.565927    | 0.763625    | 0.278438    | 0.503587    | 0.638119    | 0.265263    | 0.771074    | 0.52573     |
| 0.681416    | 0.734886    | 0.728599    | 0.095976    | 0.09104     | 0.303328    | 0.021359    | 0.015016    | 0.850911    |
| 0.015618    | 0.014595    | 0.017154    | 0.016222    | 0.015009    | 0.019163    | 0.016636    | 0.013193    | 0.020799    |
| 0.092323    | 0.091162    | 0.184474    | 0.073321    | 0.12021     | 0.128843    | 0.094239    | 0.11775     | 0.093851    |
| 0.139629    | 0.671646    | 0.684619    | 0.365289    | 0.89574     | 0.527514    | 0.182144    | 0.764847    | 0.742727    |
| 0.030972    | 0.038821    | 0.116443    | 0.029953    | 0.026888    | 0.275842    | 0.03543     | 0.024364    | 0.079603    |
| 0           | 0           | 0           | 0           | 0           | 0           | 0           | 0           | 0           |
| 0.049082    | 0.055652    | 0.072567    | 0.06792     | 0.061122    | 0.063072    | 0.070991    | 0.073284    | 0.06547     |
| 0.6079      | 0.32379     | 0.379767    | 0.622783    | 0.208305    | 0.610884    | 0.388269    | 0.765996    | 0.138873    |
| 0.03912     | 0.370995    | 0.349153    | 0.039736    | 0.030953    | 0.224864    | 0.06892     | 0.079398    | 0.054613    |
| 0.067344    | 0.068457    | 0.058673    | 0.075473    | 0.070516    | 0.069715    | 0.085571    | 0.075218    | 0.07014     |
| 0.748352    | 0.85745     | 0.891624    | 0.462448    | 0.451033    | 0.651531    | 0.397407    | 0.14491     | 0.109654    |
| 0.013146    | 0.012338    | 0.012082    | 0.012796    | 0.013086    | 0.015799    | 0.011587    | 0.010737    | 0.010774    |
| 0.279555    | 0.205964    | 0.187907    | 0.335611    | 0.07816     | 0.250697    | 0.14542     | 0.122269    | 0.078993    |
| 0.074855    | 0.057169    | 0.092238    | 0.071506    | 0.029016    | 0.051143    | 0.070263    | 0.267522    | 0.045381    |
| 0.617864    | 0.856858    | 0.958441    | 0.605925    | 0.743434    | 0.701932    | 0.460967    | 0.281163    | 0.310046    |
| 0.237234    | 0.126174    | 0.166738    | 0.326977    | 0.051095    | 0.176533    | 0.125837    | 0.686707    | 0.041202    |
| 0.070319    | 0.036616    | 0.064114    | 0.105941    | 0.033069    | 0.070527    | 0.068729    | 0.06163     | 0.061299    |



| TCGA. A4. 7 | TCGA. WN. 1 | TCGA. 2Z. 1 | TCGA. SX. 1 | TCGA. 2Z. 1 | TCGA. Y8. 1 | TCGA. UZ. 1 | TCGA. BQ. 7 | TCGA. UZ. 1 |
|-------------|-------------|-------------|-------------|-------------|-------------|-------------|-------------|-------------|
| 0.057025    | 0.061081    | 0.05595     | 0.07916     | 0.050732    | 0.060451    | 0.044481    | 0.056956    | 0.059467    |
| 0.056504    | 0           | 0           | 0.346586    | 0.088152    | 0           | 0.108082    | 0.02637     | 0           |
| 0.488618    | 0.833623    | 0.740518    | 0.730506    | 0.494369    | 0.714082    | 0.214369    | 0.925616    | 0.489507    |
| 0.022502    | 0.026743    | 0.023799    | 0.027717    | 0.02849     | 0.020414    | 0.020878    | 0.024627    | 0.018845    |
| 0           | 0           | 0           | 0           | 0           | 0           | 0           | 0           | 0           |
| 0.226155    | 0.410842    | 0.265443    | 0.090853    | 0.195693    | 0.032034    | 0.209147    | 0.561874    | 0.050262    |
| 0.034163    | 0.052326    | 0.078834    | 0.045923    | 0.023982    | 0.686902    | 0.029108    | 0.064176    | 0.021497    |
| 0.017193    | 0.015623    | 0.016695    | 0.015827    | 0.012512    | 0.014223    | 0.014071    | 0.014469    | 0.012138    |
| 0.114132    | 0           | 0           | 0           | 0.135634    | 0           | 0.190464    | 0.037892    | 0           |
| 0.105576    | 0.090525    | 0.12639     | 0.1457      | 0.113169    | 0.068081    | 0.078442    | 0.208286    | 0.101015    |
| 0.068962    | 0.119635    | 0.240894    | 0.271787    | 0.060091    | 0.085816    | 0.287779    | 0.149582    | 0.048776    |
| 0.068073    | 0           | 0           | 0.170964    | 0.059636    | 0.338392    | 0.084497    | 0.025326    | 0.214826    |
| 0.048125    | 0.070175    | 0.066174    | 0.059327    | 0.054562    | 0.045647    | 0.038272    | 0.048682    | 0.036268    |
| 0           | 0           | 0           | 0           | 0           | 0           | 0           | 0           | 0           |
| 0           | 0           | 0           | 0           | 0           | 0           | 0           | 0           | 0           |
| 0           | 0           | 0           | 0           | 0           | 0           | 0           | 0           | 0           |
| 0.035776    | 0.039448    | 0.044361    | 0.032592    | 0.138366    | 0.031438    | 0.038022    | 0.098444    | 0.043146    |
| 0.068488    | 0           | 0           | 0.093619    | 0.053569    | 0           | 0.067958    | 0.033429    | 0.168824    |
| 0.042542    | 0.044333    | 0.031251    | 0.04616     | 0.035062    | 0.039844    | 0.031397    | 0.035425    | 0.025298    |
| 0.272875    | 0           | 0           | 0           | 0.311976    | 0           | 0.38156     | 0.054637    | 0           |
| 0.06032     | 0.109438    | 0.184842    | 0.080174    | 0.029061    | 0.630438    | 0.033926    | 0.106108    | 0.031434    |
| 0.041029    | 0.036656    | 0.109669    | 0.130359    | 0.061375    | 0.123079    | 0.051842    | 0.030626    | 0.283047    |
| 0.097131    | 0.206766    | 0.084545    | 0.249372    | 0.272436    | 0.253551    | 0.078253    | 0.253584    | 0.0844      |
| 0.080685    | 0.071735    | 0.086837    | 0.106892    | 0.096315    | 0.073965    | 0.066422    | 0.103074    | 0.088218    |
| 0.064547    | 0.110344    | 0.220184    | 0.237203    | 0.055877    | 0.077827    | 0.334346    | 0.107416    | 0.045963    |
| 0.248985    | 0.718199    | 0.661826    | 0.116304    | 0.115577    | 0.529721    | 0.154532    | 0.253345    | 0.073979    |
| 0.123677    | 0.25413     | 0.121592    | 0.084459    | 0.155817    | 0.142741    | 0.090279    | 0.329062    | 0.066845    |
| 0.082623    | 0.042125    | 0.034308    | 0.021343    | 0.052841    | 0.01852     | 0.026966    | 0.061942    | 0.013381    |
| 0.042893    | 0.036879    | 0.037875    | 0.046034    | 0.041494    | 0.03535     | 0.028528    | 0.046742    | 0.039939    |
| 0.123234    | 0.620665    | 0.590854    | 0.084203    | 0.157281    | 0.448055    | 0.106892    | 0.248793    | 0.044024    |
| 0.089854    | 0.076104    | 0.038848    | 0.056324    | 0.076575    | 0.020127    | 0.026461    | 0.303114    | 0.061938    |
| 0.017158    | 0.014718    | 0.012473    | 0.020125    | 0.011452    | 0.017327    | 0.015159    | 0.01463     | 0.01264     |
| 0.097408    | 0.104324    | 0.078333    | 0.133867    | 0.080817    | 0.076396    | 0.078693    | 0.106809    | 0.105465    |
| 0.052679    | 0.428398    | 0.404666    | 0.267644    | 0.135088    | 0.897141    | 0.180834    | 0.136191    | 0.080069    |
| 0.024657    | 0.029188    | 0.026755    | 0.03207     | 0.038645    | 0.031579    | 0.019886    | 0.027486    | 0.026511    |
| 0           | 0           | 0           | 0           | 0           | 0           | 0           | 0           | 0           |
| 0.053845    | 0.077884    | 0.049744    | 0.058511    | 0.05769     | 0.061706    | 0.          |             |             |

TCGA. P4. ^ TCGA. BQ. ^ TCGA. MH. ^ TCGA. GL. ^ TCGA. GL. ^ TCGA. SX. ^ TCGA. F9. ^ TCGA. DZ. ^ TCGA. GL. 7

|           |           |           |           |           |           |           |           |           |
|-----------|-----------|-----------|-----------|-----------|-----------|-----------|-----------|-----------|
| 0. 208311 | 0. 100671 | 0. 040893 | 0. 040581 | 0. 070489 | 0. 041753 | 0. 073579 | 0. 04336  | 0. 60064  |
| 0         | 0. 039536 | 0. 095466 | 0. 044873 | 0. 041334 | 0. 191822 | 0. 028375 | 0. 039535 | 0         |
| 0. 846182 | 0. 943699 | 0. 519639 | 0. 899223 | 0. 87597  | 0. 916087 | 0. 91431  | 0. 936289 | 0. 834566 |
| 0. 033539 | 0. 03809  | 0. 034548 | 0. 012972 | 0. 026427 | 0. 014848 | 0. 02009  | 0. 019693 | 0. 049137 |
| 0         | 0         | 0         | 0         | 0         | 0         | 0         | 0         | 0         |
| 0. 758974 | 0. 323913 | 0. 125744 | 0. 554999 | 0. 544899 | 0. 067443 | 0. 471057 | 0. 513207 | 0. 78453  |
| 0. 060383 | 0. 157766 | 0. 057307 | 0. 032678 | 0. 111117 | 0. 015625 | 0. 064641 | 0. 040141 | 0. 04781  |
| 0. 014154 | 0. 013968 | 0. 017541 | 0. 010213 | 0. 014096 | 0. 013901 | 0. 012948 | 0. 010818 | 0. 014285 |
| 0         | 0. 096799 | 0. 21852  | 0. 119106 | 0. 078058 | 0. 331746 | 0. 064309 | 0. 067542 | 0         |
| 0. 446859 | 0. 081661 | 0. 148006 | 0. 082176 | 0. 143139 | 0. 057791 | 0. 130618 | 0. 146883 | 0. 426536 |
| 0. 168117 | 0. 077525 | 0. 073829 | 0. 054729 | 0. 17139  | 0. 065107 | 0. 110882 | 0. 098066 | 0. 168527 |
| 0         | 0. 034888 | 0. 086259 | 0. 036863 | 0. 049027 | 0. 130207 | 0. 029487 | 0. 025699 | 0         |
| 0. 078963 | 0. 062566 | 0. 037258 | 0. 036136 | 0. 08997  | 0. 028234 | 0. 070951 | 0. 045257 | 0. 045411 |
| 0         | 0         | 0         | 0         | 0         | 0         | 0         | 0         | 0         |
| 0         | 0         | 0         | 0         | 0         | 0         | 0         | 0         | 0         |
| 0         | 0         | 0         | 0         | 0         | 0         | 0         | 0         | 0         |
| 0. 452007 | 0. 06215  | 0. 036006 | 0. 060824 | 0. 088502 | 0. 037543 | 0. 064194 | 0. 084447 | 0. 529555 |
| 0         | 0. 027298 | 0. 107372 | 0. 032431 | 0. 046854 | 0. 105029 | 0. 034886 | 0. 040291 | 0         |
| 0. 405215 | 0. 028837 | 0. 038217 | 0. 029732 | 0. 056657 | 0. 033668 | 0. 244782 | 0. 04428  | 0. 507623 |
| 0         | 0. 191908 | 0. 389899 | 0. 148398 | 0. 112542 | 0. 356156 | 0. 112364 | 0. 086928 | 0         |
| 0. 126401 | 0. 104906 | 0. 106752 | 0. 034584 | 0. 175889 | 0. 044471 | 0. 125148 | 0. 079954 | 0. 108696 |
| 0. 039464 | 0. 305332 | 0. 062262 | 0. 038487 | 0. 067008 | 0. 435625 | 0. 039498 | 0. 099773 | 0. 493404 |
| 0. 563569 | 0. 124667 | 0. 155755 | 0. 261896 | 0. 249414 | 0. 080056 | 0. 221712 | 0. 151242 | 0. 605861 |
| 0. 111047 | 0. 117417 | 0. 078599 | 0. 087221 | 0. 093913 | 0. 071326 | 0. 07652  | 0. 10988  | 0. 082861 |
| 0. 167777 | 0. 072754 | 0. 080064 | 0. 055485 | 0. 12706  | 0. 063267 | 0. 121299 | 0. 08681  | 0. 160109 |
| 0. 403368 | 0. 812778 | 0. 540997 | 0. 493314 | 0. 648946 | 0. 199792 | 0. 6524   | 0. 528703 | 0. 273818 |
| 0. 513361 | 0. 145987 | 0. 11332  | 0. 215775 | 0. 266646 | 0. 075214 | 0. 251255 | 0. 276489 | 0. 617355 |
| 0. 50331  | 0. 505165 | 0. 054612 | 0. 039154 | 0. 407008 | 0. 018838 | 0. 579352 | 0. 164459 | 0. 523256 |
| 0. 169384 | 0. 045236 | 0. 036152 | 0. 039804 | 0. 073618 | 0. 03364  | 0. 043753 | 0. 0473   | 0. 595236 |
| 0. 356308 | 0. 393464 | 0. 335767 | 0. 31533  | 0. 554241 | 0. 104407 | 0. 496252 | 0. 361444 | 0. 124758 |
| 0. 560422 | 0. 788072 | 0. 03365  | 0. 083923 | 0. 446857 | 0. 030861 | 0. 581486 | 0. 305182 | 0. 530078 |
| 0. 488654 | 0. 015304 | 0. 024865 | 0. 010321 | 0. 081318 | 0. 022144 | 0. 391088 | 0. 022397 | 0. 5355   |
| 0. 446731 | 0. 155265 | 0. 065277 | 0. 279639 | 0. 144314 | 0. 071712 | 0. 142188 | 0. 116646 | 0. 652073 |
| 0. 175692 | 0. 42834  | 0. 592835 | 0. 092785 | 0. 357574 | 0. 044292 | 0. 215966 | 0. 149289 | 0. 092546 |
| 0. 057673 | 0. 029146 | 0. 026403 | 0. 025383 | 0. 029777 | 0. 024499 | 0. 03341  | 0. 024052 | 0. 436625 |
| 0         | 0         | 0         | 0         | 0         | 0         | 0         | 0         | 0         |
| 0. 404271 | 0. 070807 | 0. 054641 | 0. 05038  | 0. 093278 | 0. 055707 | 0. 297769 | 0. 068576 | 0. 509421 |
| 0. 831391 | 0. 446007 | 0. 202842 | 0. 576666 | 0. 563134 | 0. 150542 | 0. 554367 | 0. 542294 | 0. 846677 |
| 0. 059843 | 0. 037846 | 0. 030174 | 0. 110461 | 0. 071029 | 0. 02678  | 0. 044046 | 0. 055232 | 0. 060293 |
| 0. 385887 | 0. 065562 | 0. 071591 | 0. 048922 | 0. 093843 | 0. 061922 | 0. 273411 | 0. 075515 | 0. 477964 |
| 0. 72416  | 0. 777248 | 0. 397721 | 0. 53372  | 0. 658128 | 0. 224081 | 0. 718805 | 0. 633261 | 0. 617433 |
| 0. 014527 | 0. 014421 | 0. 015392 | 0. 00976  | 0. 015739 | 0. 01291  | 0. 01063  | 0. 012119 | 0. 014377 |
| 0. 499434 | 0. 136419 | 0. 145012 | 0. 190906 | 0. 24097  | 0. 084894 | 0. 211942 | 0. 190373 | 0. 577297 |
| 0. 433289 | 0. 066007 | 0. 052865 | 0. 06119  | 0. 100883 | 0. 035247 | 0. 075129 | 0. 080169 | 0. 542335 |
| 0. 733588 | 0. 659556 | 0. 467914 | 0. 636424 | 0. 75714  | 0. 291126 | 0. 725022 | 0. 631922 | 0. 649117 |
| 0. 428521 | 0. 134138 | 0. 090551 | 0. 177673 | 0. 293872 | 0. 030187 | 0. 174726 | 0. 227421 | 0. 59159  |
| 0. 084033 | 0. 060016 | 0. 039206 | 0. 048599 | 0. 061705 | 0. 033013 | 0. 057525 | 0. 081318 | 0. 052699 |

TCGA. G7. ^TCGA. Y8. ^TCGA. BQ. 7TCGA. HE. ^TCGA. B9. 7TCGA. MH. ^TCGA. B9. ^TCGA. P4. ^TCGA. A4. 8

|          |          |          |          |          |          |          |          |          |
|----------|----------|----------|----------|----------|----------|----------|----------|----------|
| 0.048693 | 0.058759 | 0.189403 | 0.086547 | 0.052437 | 0.066008 | 0.047098 | 0.108435 | 0.050289 |
| 0.062246 | 0.050817 | 0.090025 | 0.270567 | 0.255352 | 0.037998 | 0.042423 | 0.130648 | 0.22407  |
| 0.784589 | 0.92368  | 0.925305 | 0.948224 | 0.92851  | 0.844079 | 0.912652 | 0.941828 | 0.853115 |
| 0.018027 | 0.019311 | 0.021983 | 0.019821 | 0.029309 | 0.021532 | 0.024237 | 0.029412 | 0.041672 |
| 0        | 0        | 0        | 0        | 0        | 0        | 0        | 0        | 0        |
| 0.127512 | 0.457978 | 0.208518 | 0.212133 | 0.058274 | 0.248454 | 0.486557 | 0.264457 | 0.126063 |
| 0.052952 | 0.053742 | 0.391227 | 0.047218 | 0.385045 | 0.02836  | 0.030272 | 0.14924  | 0.030813 |
| 0.014686 | 0.01389  | 0.013031 | 0.012301 | 0.011269 | 0.014872 | 0.013491 | 0.016414 | 0.014062 |
| 0.15986  | 0.140178 | 0.203449 | 0.27317  | 0.382129 | 0.043979 | 0.090765 | 0.213909 | 0.327337 |
| 0.079938 | 0.105649 | 0.135589 | 0.123317 | 0.113323 | 0.158156 | 0.1531   | 0.13136  | 0.124389 |
| 0.199419 | 0.080926 | 0.286702 | 0.047281 | 0.069156 | 0.061712 | 0.093613 | 0.081637 | 0.062278 |
| 0.0652   | 0.044391 | 0.069927 | 0.139901 | 0.32548  | 0.031117 | 0.030388 | 0.061882 | 0.114953 |
| 0.036137 | 0.064605 | 0.045819 | 0.050495 | 0.050045 | 0.036622 | 0.053143 | 0.037506 | 0.044541 |
| 0        | 0        | 0        | 0        | 0        | 0        | 0        | 0        | 0        |
| 0        | 0        | 0        | 0        | 0        | 0        | 0        | 0        | 0        |
| 0        | 0        | 0        | 0        | 0        | 0        | 0        | 0        | 0        |
| 0.038377 | 0.08384  | 0.072571 | 0.026202 | 0.065156 | 0.05488  | 0.065857 | 0.050974 | 0.030993 |
| 0.069787 | 0.060177 | 0.059448 | 0.098758 | 0.17875  | 0.043745 | 0.067317 | 0.073717 | 0.086634 |
| 0.025251 | 0.04836  | 0.036449 | 0.022736 | 0.032658 | 0.035911 | 0.036071 | 0.038594 | 0.031922 |
| 0.361938 | 0.104628 | 0.295128 | 0.412384 | 0.427081 | 0.057339 | 0.193413 | 0.404008 | 0.44939  |
| 0.140706 | 0.092173 | 0.467965 | 0.081504 | 0.444735 | 0.054791 | 0.060745 | 0.120745 | 0.055746 |
| 0.033595 | 0.103674 | 0.243473 | 0.126485 | 0.033887 | 0.051706 | 0.043162 | 0.327464 | 0.404236 |
| 0.057447 | 0.284898 | 0.093049 | 0.130916 | 0.155455 | 0.434422 | 0.219504 | 0.207068 | 0.093725 |
| 0.094568 | 0.107302 | 0.106578 | 0.088419 | 0.083362 | 0.082628 | 0.09681  | 0.098897 | 0.104699 |
| 0.248087 | 0.087371 | 0.281687 | 0.055067 | 0.077654 | 0.053482 | 0.07272  | 0.090401 | 0.062858 |
| 0.387113 | 0.339839 | 0.869186 | 0.503642 | 0.304198 | 0.092124 | 0.642573 | 0.793701 | 0.335542 |
| 0.124592 | 0.25013  | 0.132808 | 0.122571 | 0.127136 | 0.268953 | 0.182575 | 0.126878 | 0.097354 |
| 0.018084 | 0.113527 | 0.427502 | 0.347181 | 0.021721 | 0.024909 | 0.136888 | 0.294081 | 0.02939  |
| 0.037413 | 0.044151 | 0.137462 | 0.039758 | 0.04633  | 0.038832 | 0.048113 | 0.070038 | 0.035543 |
| 0.145451 | 0.298827 | 0.606137 | 0.141962 | 0.25298  | 0.114192 | 0.440104 | 0.500557 | 0.12981  |
| 0.026779 | 0.490207 | 0.746349 | 0.802077 | 0.072845 | 0.031802 | 0.242639 | 0.573873 | 0.047701 |
| 0.018342 | 0.017629 | 0.016992 | 0.014975 | 0.016829 | 0.016686 | 0.016961 | 0.020336 | 0.014552 |
| 0.075579 | 0.107567 | 0.099885 | 0.061982 | 0.097028 | 0.143664 | 0.07542  | 0.06862  | 0.078931 |
| 0.382845 | 0.273237 | 0.846528 | 0.34598  | 0.883633 | 0.040953 | 0.168285 | 0.629688 | 0.19768  |
| 0.030517 | 0.038209 | 0.127826 | 0.027466 | 0.02619  | 0.032782 | 0.032757 | 0.031583 | 0.023284 |
| 0        | 0        | 0        | 0        | 0        | 0        | 0        | 0        | 0        |
| 0.049975 | 0.066554 | 0.060966 | 0.056844 | 0.053615 | 0.045267 | 0.059622 | 0.058921 | 0.054069 |
| 0.19172  | 0.527186 | 0.257042 | 0.268563 | 0.071303 | 0.319687 | 0.526544 | 0.30202  | 0.192946 |
| 0.032297 | 0.036078 | 0.204774 | 0.027572 | 0.026998 | 0.02501  | 0.033566 | 0.032367 | 0.026874 |
| 0.052212 | 0.063808 | 0.069952 | 0.066891 | 0.073889 | 0.056484 | 0.063349 | 0.082695 | 0.079783 |
| 0.282199 | 0.508782 | 0.714671 | 0.718877 | 0.210257 | 0.32363  | 0.613982 | 0.716241 | 0.27024  |
| 0.013805 | 0.013512 | 0.011636 | 0.015039 | 0.011897 | 0.01561  | 0.012115 | 0.014391 | 0.013045 |
| 0.173768 | 0.193251 | 0.142413 | 0.13668  | 0.155133 | 0.249148 | 0.178634 | 0.143214 | 0.097922 |
| 0.037738 | 0.085389 | 0.071551 | 0.036738 | 0.051117 | 0.07936  | 0.051382 | 0.058037 | 0.042254 |
| 0.448559 | 0.56082  | 0.626412 | 0.513441 | 0.208203 | 0.481187 | 0.583107 | 0.555681 | 0.40985  |
| 0.04695  | 0.147406 | 0.074064 | 0.079882 | 0.04096  | 0.166786 | 0.240758 | 0.150136 | 0.073029 |
| 0.030727 | 0.06269  | 0.060511 | 0.051289 | 0.041262 | 0.056602 | 0.078917 | 0.051366 | 0.04903  |

TCGA. P4. ^TCGA. G7. 7TCGA. 2Z. ^TCGA. 5P. ^TCGA. AT. ^TCGA. 2Z. ^TCGA. 5P. ^TCGA. 2Z. ^TCGA. EV. 5

|          |          |          |          |          |          |          |          |          |
|----------|----------|----------|----------|----------|----------|----------|----------|----------|
| 0.442288 | 0.063172 | 0.060559 | 0.07302  | 0.481253 | 0.153704 | 0.054047 | 0.040355 | 0.173617 |
| 0        | 0        | 0.059137 | 0.117817 | 0.225988 | 0.797396 | 0        | 0.092366 | 0.287161 |
| 0.917913 | 0.931324 | 0.726484 | 0.89837  | 0.942678 | 0.930734 | 0.875427 | 0.901724 | 0.96596  |
| 0.033282 | 0.041181 | 0.021081 | 0.028239 | 0.016713 | 0.038439 | 0.128641 | 0.018877 | 0.019337 |
| 0        | 0        | 0        | 0        | 0        | 0        | 0        | 0        | 0        |
| 0.339825 | 0.155626 | 0.343179 | 0.161595 | 0.163231 | 0.224335 | 0.151567 | 0.263367 | 0.061319 |
| 0.079792 | 0.037218 | 0.055379 | 0.032861 | 0.147913 | 0.036814 | 0.031904 | 0.059386 | 0.299443 |
| 0.015646 | 0.019232 | 0.01403  | 0.015454 | 0.014728 | 0.012769 | 0.01493  | 0.016767 | 0.016006 |
| 0        | 0        | 0.129942 | 0.259643 | 0.347397 | 0.801021 | 0        | 0.145794 | 0        |
| 0.175049 | 0.091758 | 0.110419 | 0.115863 | 0.098351 | 0.103412 | 0.126431 | 0.136733 | 0.085975 |
| 0.121599 | 0.071598 | 0.068649 | 0.052315 | 0.095008 | 0.053174 | 0.182455 | 0.074654 | 0.071393 |
| 0.407259 | 0        | 0.050874 | 0.120509 | 0.19501  | 0.736879 | 0        | 0.064756 | 0.27859  |
| 0.048772 | 0.04457  | 0.04901  | 0.034853 | 0.04138  | 0.045892 | 0.046941 | 0.047542 | 0.060071 |
| 0        | 0        | 0        | 0        | 0        | 0        | 0        | 0        | 0        |
| 0        | 0        | 0        | 0        | 0        | 0        | 0        | 0        | 0        |
| 0        | 0        | 0        | 0        | 0        | 0        | 0        | 0        | 0        |
| 0.038905 | 0.043986 | 0.061616 | 0.044432 | 0.060844 | 0.038664 | 0.048046 | 0.043286 | 0.032015 |
| 0        | 0        | 0.06904  | 0.139062 | 0.106981 | 0.644313 | 0.520881 | 0.054337 | 0.146056 |
| 0.041793 | 0.027968 | 0.031309 | 0.02809  | 0.030979 | 0.028217 | 0.033663 | 0.030765 | 0.02931  |
| 0        | 0        | 0.247188 | 0.390483 | 0.447575 | 0.856945 | 0        | 0.361435 | 0        |
| 0.130536 | 0.129592 | 0.095859 | 0.057628 | 0.158752 | 0.080345 | 0.112444 | 0.131241 | 0.440532 |
| 0.576108 | 0.071258 | 0.327356 | 0.586557 | 0.713184 | 0.042199 | 0.031399 | 0.309772 | 0.663401 |
| 0.186937 | 0.116618 | 0.09984  | 0.146811 | 0.276535 | 0.078004 | 0.086583 | 0.15846  | 0.14308  |
| 0.12007  | 0.103367 | 0.086792 | 0.084015 | 0.108625 | 0.074315 | 0.079504 | 0.084221 | 0.117953 |
| 0.110968 | 0.079093 | 0.080033 | 0.054022 | 0.094003 | 0.057792 | 0.183476 | 0.087037 | 0.067259 |
| 0.33684  | 0.269127 | 0.363755 | 0.324466 | 0.363021 | 0.830247 | 0.561329 | 0.749691 | 0.837725 |
| 0.16782  | 0.094917 | 0.173756 | 0.127841 | 0.119967 | 0.116471 | 0.109443 | 0.251159 | 0.09513  |
| 0.105198 | 0.714299 | 0.025043 | 0.065897 | 0.315752 | 0.79491  | 0.616779 | 0.184961 | 0.78269  |
| 0.393368 | 0.052668 | 0.036741 | 0.043219 | 0.372812 | 0.043821 | 0.040945 | 0.033578 | 0.074635 |
| 0.266328 | 0.180288 | 0.212918 | 0.096398 | 0.166725 | 0.288804 | 0.4932   | 0.29146  | 0.703244 |
| 0.210128 | 0.773032 | 0.035949 | 0.17195  | 0.678313 | 0.893633 | 0.641187 | 0.351901 | 0.971328 |
| 0.018737 | 0.020546 | 0.017075 | 0.022489 | 0.015679 | 0.016055 | 0.015839 | 0.014002 | 0.011147 |
| 0.071048 | 0.177034 | 0.083671 | 0.089245 | 0.083955 | 0.086314 | 0.075475 | 0.144325 | 0.240655 |
| 0.133775 | 0.108752 | 0.425727 | 0.282023 | 0.564916 | 0.240145 | 0.066508 | 0.480806 | 0.833202 |
| 0.328098 | 0.033106 | 0.029776 | 0.03886  | 0.341129 | 0.030663 | 0.023767 | 0.030805 | 0.060279 |
| 0        | 0        | 0        | 0        | 0        | 0        | 0        | 0        | 0        |
| 0.084596 | 0.053669 | 0.058373 | 0.053293 | 0.045257 | 0.065203 | 0.060768 | 0.056246 | 0.035661 |
| 0.42435  | 0.233263 | 0.37777  | 0.232549 | 0.211625 | 0.244001 | 0.209219 | 0.298954 | 0.100096 |
| 0.058313 | 0.041921 | 0.031321 | 0.029065 | 0.023846 | 0.03296  | 0.041881 | 0.033769 | 0.055423 |
| 0.086116 | 0.078588 | 0.08374  | 0.068031 | 0.069881 | 0.094327 | 0.072626 | 0.071211 | 0.052941 |
| 0.536414 | 0.852725 | 0.31891  | 0.322857 | 0.601261 | 0.901434 | 0.684493 | 0.663622 | 0.976862 |
| 0.013892 | 0.018397 | 0.013811 | 0.015025 | 0.015158 | 0.013685 | 0.014427 | 0.014502 | 0.013425 |
| 0.160581 | 0.164368 | 0.138354 | 0.141792 | 0.162313 | 0.093146 | 0.110137 | 0.336764 | 0.116135 |
| 0.0466   | 0.057326 | 0.061056 | 0.072498 | 0.075436 | 0.037607 | 0.053077 | 0.073821 | 0.054052 |
| 0.532131 | 0.814069 | 0.478132 | 0.415446 | 0.462605 | 0.926517 | 0.681234 | 0.611158 | 0.680463 |
| 0.162183 | 0.077556 | 0.189858 | 0.056355 | 0.096188 | 0.09613  | 0.062224 | 0.069879 | 0.028158 |
| 0.071368 | 0.045067 | 0.059507 | 0.042364 | 0.042833 | 0.058057 | 0.048841 | 0.038526 | 0.040834 |

TCGA. UZ. A TCGA. A4. 7TCGA. SX. A TCGA. 2Z. A TCGA. G7. 6TCGA. A4. 7TCGA. B1. A TCGA. WN. A TCGA. BQ. 5

|          |          |          |          |          |          |          |          |          |
|----------|----------|----------|----------|----------|----------|----------|----------|----------|
| 0.048078 | 0.045034 | 0.158952 | 0.070574 | 0.447542 | 0.041719 | 0.069614 | 0.043637 | 0.033312 |
| 0.119054 | 0.174978 | 0.108473 | 0.109589 | 0        | 0.056297 | 0.050544 | 0.029935 | 0.031966 |
| 0.44397  | 0.944875 | 0.412716 | 0.696742 | 0.839233 | 0.93043  | 0.902465 | 0.899563 | 0.907161 |
| 0.021801 | 0.023679 | 0.015401 | 0.020391 | 0.027471 | 0.016501 | 0.023363 | 0.022868 | 0.026397 |
| 0        | 0        | 0        | 0        | 0        | 0        | 0        | 0        | 0        |
| 0.168136 | 0.14457  | 0.091203 | 0.170014 | 0.325151 | 0.296872 | 0.362974 | 0.837835 | 0.485248 |
| 0.033239 | 0.18065  | 0.491635 | 0.026501 | 0.1404   | 0.160955 | 0.028393 | 0.099624 | 0.068145 |
| 0.014763 | 0.014057 | 0.013623 | 0.010911 | 0.01462  | 0.017823 | 0.014975 | 0.013751 | 0.011311 |
| 0.272035 | 0.160565 | 0.270451 | 0        | 0        | 0.070336 | 0.1136   | 0.053508 | 0.043281 |
| 0.120503 | 0.159471 | 0.048228 | 0.096987 | 0.119293 | 0.126505 | 0.159659 | 0.077962 | 0.201096 |
| 0.076709 | 0.070114 | 0.096576 | 0.041498 | 0.484768 | 0.07132  | 0.058955 | 0.084901 | 0.12975  |
| 0.189669 | 0.064935 | 0.086047 | 0.115518 | 0        | 0.035467 | 0.051089 | 0.021942 | 0.027561 |
| 0.033726 | 0.039308 | 0.049475 | 0.03198  | 0.05454  | 0.049783 | 0.061555 | 0.163912 | 0.076602 |
| 0        | 0        | 0        | 0        | 0        | 0        | 0        | 0        | 0        |
| 0        | 0        | 0        | 0        | 0        | 0        | 0        | 0        | 0        |
| 0        | 0        | 0        | 0        | 0        | 0        | 0        | 0        | 0        |
| 0.040769 | 0.064417 | 0.026624 | 0.031185 | 0.043337 | 0.053296 | 0.088935 | 0.034186 | 0.128302 |
| 0.062645 | 0.050666 | 0.073222 | 0.074633 | 0        | 0.045033 | 0.055844 | 0.021073 | 0.039761 |
| 0.029266 | 0.031965 | 0.030865 | 0.024253 | 0.024906 | 0.037314 | 0.032149 | 0.031302 | 0.041675 |
| 0.364752 | 0.370854 | 0.388885 | 0        | 0        | 0.181566 | 0.257499 | 0.103962 | 0.054307 |
| 0.084754 | 0.232861 | 0.52481  | 0.031102 | 0.220763 | 0.215353 | 0.080647 | 0.3478   | 0.150243 |
| 0.249992 | 0.031521 | 0.23622  | 0.042994 | 0.382136 | 0.040053 | 0.225323 | 0.031193 | 0.03128  |
| 0.114674 | 0.092315 | 0.118574 | 0.134007 | 0.101359 | 0.224923 | 0.132651 | 0.157528 | 0.232042 |
| 0.088086 | 0.095881 | 0.075133 | 0.103365 | 0.11696  | 0.115397 | 0.078966 | 0.07648  | 0.110919 |
| 0.081679 | 0.070598 | 0.092372 | 0.055424 | 0.487905 | 0.085155 | 0.062321 | 0.108075 | 0.13953  |
| 0.327148 | 0.748783 | 0.695805 | 0.124321 | 0.67155  | 0.760056 | 0.604121 | 0.848881 | 0.618095 |
| 0.117183 | 0.098809 | 0.099287 | 0.112556 | 0.137464 | 0.209097 | 0.19171  | 0.17506  | 0.32446  |
| 0.015588 | 0.095773 | 0.015327 | 0.018057 | 0.575636 | 0.347466 | 0.025628 | 0.133534 | 0.496262 |
| 0.03538  | 0.043029 | 0.10364  | 0.041733 | 0.445077 | 0.053054 | 0.038682 | 0.049144 | 0.042584 |
| 0.150284 | 0.366253 | 0.396419 | 0.090848 | 0.414161 | 0.77909  | 0.223454 | 0.545177 | 0.533079 |
| 0.026715 | 0.743658 | 0.022331 | 0.030689 | 0.611644 | 0.547142 | 0.277375 | 0.224238 | 0.520049 |
| 0.014418 | 0.013856 | 0.043507 | 0.014373 | 0.015296 | 0.020617 | 0.016798 | 0.012339 | 0.016532 |
| 0.074887 | 0.113464 | 0.082716 | 0.127885 | 0.150251 | 0.103036 | 0.089517 | 0.257504 | 0.13941  |
| 0.17048  | 0.595504 | 0.82923  | 0.056694 | 0.262054 | 0.520472 | 0.237355 | 0.457891 | 0.221785 |
| 0.042987 | 0.025664 | 0.067099 | 0.02598  | 0.416104 | 0.039918 | 0.025678 | 0.032589 | 0.025439 |
| 0        | 0        | 0        | 0        | 0        | 0        | 0        | 0        | 0        |
| 0.052844 | 0.051043 | 0.069152 | 0.054913 | 0.06033  | 0.074734 | 0.055568 | 0.046685 | 0.068739 |
| 0.216679 | 0.191378 | 0.156249 | 0.262481 | 0.388887 | 0.372337 | 0.426561 | 0.844564 | 0.554472 |
| 0.027194 | 0.051429 | 0.040552 | 0.021842 | 0.088708 | 0.150038 | 0.048833 | 0.136978 | 0.083853 |
| 0.063903 | 0.067187 | 0.065807 | 0.070691 | 0.062123 | 0.086376 | 0.068682 | 0.06394  | 0.077361 |
| 0.226163 | 0.486518 | 0.147998 | 0.187993 | 0.61821  | 0.763368 | 0.438212 | 0.662792 | 0.757561 |
| 0.012508 | 0.011814 | 0.012863 | 0.011098 | 0.010572 | 0.012725 | 0.014057 | 0.012033 | 0.014051 |
| 0.099327 | 0.265467 | 0.127802 | 0.125999 | 0.10605  | 0.147668 | 0.207466 | 0.162797 | 0.293713 |
| 0.050103 | 0.066033 | 0.030673 | 0.03103  | 0.059591 | 0.060501 | 0.085456 | 0.04376  | 0.127572 |
| 0.414284 | 0.342143 | 0.325744 | 0.383841 | 0.678669 | 0.695721 | 0.550936 | 0.608004 | 0.804326 |
| 0.096339 | 0.094519 | 0.040627 | 0.071359 | 0.104165 | 0.109825 | 0.21164  | 0.510597 | 0.29168  |
| 0.05428  | 0.049559 | 0.043122 | 0.035713 | 0.074661 | 0.075436 | 0.074456 | 0.108218 | 0.081515 |

| TCGA. 5P. A | TCGA. B1. A | TCGA. BQ. E | TCGA. BQ. E | TCGA. EV. E | TCGA. BQ. E | TCGA. 5P. A | TCGA. 5P. A | TCGA. DW. 7 |
|-------------|-------------|-------------|-------------|-------------|-------------|-------------|-------------|-------------|
| 0.042778    | 0.0527      | 0.062687    | 0.045115    | 0.041888    | 0.038062    | 0.166147    | 0.040072    | 0.034278    |
| 0.096009    | 0.385175    | 0.034562    | 0.050466    | 0           | 0.036311    | 0.134437    | 0.030145    | 0.053193    |
| 0.931767    | 0.611879    | 0.882496    | 0.908135    | 0.796538    | 0.784442    | 0.932452    | 0.553838    | 0.94013     |
| 0.022928    | 0.020499    | 0.024298    | 0.022157    | 0.130797    | 0.021915    | 0.025553    | 0.021739    | 0.030415    |
| 0           | 0           | 0           | 0           | 0           | 0           | 0           | 0           | 0           |
| 0.148248    | 0.109585    | 0.415321    | 0.25874     | 0.345024    | 0.402297    | 0.167186    | 0.393358    | 0.360342    |
| 0.117543    | 0.371824    | 0.098039    | 0.092225    | 0.195475    | 0.259786    | 0.045027    | 0.172824    | 0.046799    |
| 0.016979    | 0.017223    | 0.01055     | 0.023789    | 0.017103    | 0.044482    | 0.015812    | 0.014003    | 0.016436    |
| 0.238657    | 0.395167    | 0.049824    | 0.072278    | 0           | 0.069956    | 0.229323    | 0.045025    | 0.075627    |
| 0.204273    | 0.138889    | 0.155214    | 0.099716    | 0.11745     | 0.178172    | 0.090789    | 0.090495    | 0.180391    |
| 0.231545    | 0.153371    | 0.173274    | 0.215318    | 0.089581    | 0.141534    | 0.089207    | 0.275263    | 0.077765    |
| 0.055221    | 0           | 0.028927    | 0.03203     | 0           | 0.033774    | 0.080149    | 0.038209    | 0.039871    |
| 0.056768    | 0.040626    | 0.045614    | 0.041842    | 0.05434     | 0.106147    | 0.041627    | 0.077539    | 0.049435    |
| 0           | 0           | 0           | 0           | 0           | 0           | 0           | 0           | 0           |
| 0           | 0           | 0           | 0           | 0           | 0           | 0           | 0           | 0           |
| 0           | 0           | 0           | 0           | 0           | 0           | 0           | 0           | 0           |
| 0.074067    | 0.037003    | 0.078994    | 0.042294    | 0.05246     | 0.070726    | 0.028969    | 0.048375    | 0.045975    |
| 0.052812    | 0           | 0.026665    | 0.050376    | 0           | 0.022577    | 0.079283    | 0.035604    | 0.051338    |
| 0.041597    | 0.027444    | 0.046175    | 0.028398    | 0.050448    | 0.043074    | 0.030628    | 0.03042     | 0.036978    |
| 0.43483     | 0.469136    | 0.067274    | 0.201203    | 0.251168    | 0.121644    | 0.451049    | 0.092256    | 0.232515    |
| 0.165622    | 0.448961    | 0.167536    | 0.147448    | 0.822333    | 0.254113    | 0.10632     | 0.375551    | 0.069118    |
| 0.040044    | 0.158874    | 0.040482    | 0.02344     | 0.03068     | 0.024567    | 0.215489    | 0.044884    | 0.023528    |
| 0.29008     | 0.095092    | 0.143633    | 0.119074    | 0.117222    | 0.139405    | 0.114487    | 0.199221    | 0.258525    |
| 0.083245    | 0.084428    | 0.091066    | 0.088828    | 0.120512    | 0.104013    | 0.073016    | 0.087659    | 0.110362    |
| 0.225253    | 0.16928     | 0.149419    | 0.235964    | 0.148969    | 0.192623    | 0.082629    | 0.292178    | 0.082573    |
| 0.44539     | 0.584571    | 0.703997    | 0.717223    | 0.259395    | 0.713052    | 0.509903    | 0.619894    | 0.475608    |
| 0.393218    | 0.114161    | 0.188903    | 0.204042    | 0.223397    | 0.233437    | 0.081618    | 0.222888    | 0.256639    |
| 0.097907    | 0.019636    | 0.553549    | 0.357986    | 0.028903    | 0.049331    | 0.175083    | 0.055818    | 0.046138    |
| 0.043498    | 0.044673    | 0.061051    | 0.042831    | 0.03451     | 0.045019    | 0.079254    | 0.037816    | 0.043822    |
| 0.253505    | 0.283453    | 0.452614    | 0.349504    | 0.260644    | 0.517337    | 0.140411    | 0.452219    | 0.290388    |
| 0.250216    | 0.070419    | 0.490533    | 0.565024    | 0.048501    | 0.077817    | 0.41606     | 0.073479    | 0.126988    |
| 0.030706    | 0.018855    | 0.012537    | 0.013484    | 0.011815    | 0.011218    | 0.013254    | 0.040366    | 0.013609    |
| 0.181655    | 0.080804    | 0.125312    | 0.118213    | 0.137973    | 0.21731     | 0.082228    | 0.090035    | 0.066479    |
| 0.671847    | 0.806284    | 0.17617     | 0.261717    | 0.157106    | 0.519386    | 0.363305    | 0.533198    | 0.10308     |
| 0.026247    | 0.029077    | 0.034438    | 0.027435    | 0.027314    | 0.030779    | 0.051285    | 0.027817    | 0.019109    |
| 0           | 0           | 0           | 0           | 0           | 0           | 0           | 0           | 0           |
| 0.053483    | 0.040704    | 0.05175     | 0.049631    | 0.051004    | 0.075995    | 0.066235    | 0.057636    | 0.051333    |
| 0.209771    | 0.147808    | 0.460831    | 0.315963    | 0.292034    | 0.452784    | 0.248751    | 0.459166    | 0.420939    |
| 0.024105    | 0.039825    | 0.076452    | 0.046472    | 0.0647      | 0.120394    | 0.026186    | 0.047251    | 0.044041    |
| 0.079641    | 0.072476    | 0.068354    | 0.070901    | 0.101489    | 0.085048    | 0.076944    | 0.072875    | 0.071728    |
| 0.58363     | 0.24198     | 0.687495    | 0.732784    | 0.451298    | 0.414339    | 0.310282    | 0.306008    | 0.479377    |
| 0.013341    | 0.0152      | 0.010528    | 0.013852    | 0.015069    | 0.012057    | 0.014163    | 0.01819     | 0.014319    |
| 0.432607    | 0.263207    | 0.156248    | 0.140027    | 0.194856    | 0.351227    | 0.119225    | 0.100573    | 0.210268    |
| 0.084856    | 0.034232    | 0.07546     | 0.051558    | 0.08575     | 0.088884    | 0.049634    | 0.054945    | 0.061318    |
| 0.478935    | 0.361606    | 0.736155    | 0.803123    | 0.494378    | 0.474927    | 0.428173    | 0.483815    | 0.569793    |
| 0.055069    | 0.072856    | 0.16699     | 0.097367    | 0.133787    | 0.233418    | 0.089393    | 0.079806    | 0.215349    |
| 0.048356    | 0.047601    | 0.087027    | 0.063909    | 0.058875    | 0.079783    | 0.05895     | 0.061933    | 0.074897    |

TCGA. G7. 7TCGA. BQ. 5TCGA. BQ. 7TCGA. 5P. 7TCGA. UZ. 7TCGA. HE. 7TCGA. 5P. A9K4. 01A. 11D. A42K. C

|          |          |          |          |          |          |          |
|----------|----------|----------|----------|----------|----------|----------|
| 0.053486 | 0.782868 | 0.052901 | 0.049124 | 0.133825 | 0.051826 | 0.093016 |
| 0.306076 | 0.069888 | 0.065106 | 0.046328 | 0.074948 | 0.17413  | 0.089623 |
| 0.926054 | 0.505949 | 0.946671 | 0.912051 | 0.902051 | 0.9134   | 0.939124 |
| 0.024002 | 0.020264 | 0.017688 | 0.030007 | 0.013958 | 0.054894 | 0.020518 |
| 0        | 0        | 0        | 0        | 0        | 0        | 0        |
| 0.347517 | 0.231699 | 0.392523 | 0.350141 | 0.248639 | 0.107656 | 0.147304 |
| 0.16185  | 0.595296 | 0.031956 | 0.034411 | 0.06985  | 0.219159 | 0.028985 |
| 0.014736 | 0.015322 | 0.01303  | 0.01672  | 0.010984 | 0.016048 | 0.010537 |
| 0.313735 | 0.138727 | 0.09692  | 0.189575 | 0.251863 | 0.385571 | 0.200706 |
| 0.146349 | 0.251991 | 0.131226 | 0.151927 | 0.051675 | 0.19094  | 0.074233 |
| 0.073586 | 0.290894 | 0.0698   | 0.106281 | 0.059813 | 0.179149 | 0.057006 |
| 0.340823 | 0.066919 | 0.044579 | 0.043164 | 0.056999 | 0.102424 | 0.068461 |
| 0.050151 | 0.051415 | 0.048484 | 0.043377 | 0.040337 | 0.050248 | 0.04372  |
| 0        | 0        | 0        | 0        | 0        | 0        | 0        |
| 0        | 0        | 0        | 0        | 0        | 0        | 0        |
| 0        | 0        | 0        | 0        | 0        | 0        | 0        |
| 0.088192 | 0.520777 | 0.054612 | 0.041872 | 0.044994 | 0.0333   | 0.039913 |
| 0.458091 | 0.098845 | 0.046913 | 0.043949 | 0.036822 | 0.105895 | 0.062296 |
| 0.026561 | 0.506525 | 0.037948 | 0.035047 | 0.023278 | 0.045316 | 0.028627 |
| 0.219611 | 0        | 0.198727 | 0.269707 | 0.272768 | 0        | 0.324724 |
| 0.172581 | 0.77928  | 0.080934 | 0.068719 | 0.13525  | 0.289123 | 0.05305  |
| 0.051182 | 0.438748 | 0.075626 | 0.050177 | 0.396666 | 0.044779 | 0.296002 |
| 0.1147   | 0.768162 | 0.170769 | 0.176213 | 0.228094 | 0.102345 | 0.076077 |
| 0.08219  | 0.109772 | 0.125115 | 0.092423 | 0.075694 | 0.105768 | 0.07868  |
| 0.077477 | 0.290534 | 0.059748 | 0.120839 | 0.063445 | 0.170619 | 0.070953 |
| 0.32973  | 0.832617 | 0.476759 | 0.649694 | 0.242974 | 0.640475 | 0.068475 |
| 0.156308 | 0.684718 | 0.22757  | 0.216559 | 0.158504 | 0.101064 | 0.063052 |
| 0.429012 | 0.019293 | 0.040704 | 0.427317 | 0.019732 | 0.076925 | 0.016192 |
| 0.047491 | 0.774168 | 0.040611 | 0.038442 | 0.055193 | 0.045889 | 0.039413 |
| 0.185036 | 0.79586  | 0.248613 | 0.430269 | 0.17385  | 0.172355 | 0.090554 |
| 0.624138 | 0.024422 | 0.130096 | 0.60089  | 0.19567  | 0.23943  | 0.040624 |
| 0.019611 | 0.594803 | 0.014688 | 0.016293 | 0.0108   | 0.031209 | 0.011459 |
| 0.11243  | 0.693916 | 0.115168 | 0.095642 | 0.139638 | 0.085688 | 0.109569 |
| 0.356894 | 0.89841  | 0.136982 | 0.162231 | 0.25597  | 0.427554 | 0.027808 |
| 0.029462 | 0.619255 | 0.026618 | 0.031355 | 0.086314 | 0.040121 | 0.027537 |
| 0        | 0        | 0        | 0        | 0        | 0        | 0        |
| 0.070613 | 0.660576 | 0.059637 | 0.050274 | 0.05212  | 0.065499 | 0.056241 |
| 0.396037 | 0.31796  | 0.453753 | 0.406853 | 0.365152 | 0.166222 | 0.182783 |
| 0.025246 | 0.62062  | 0.039103 | 0.038966 | 0.023782 | 0.065032 | 0.025499 |
| 0.06741  | 0.65138  | 0.060513 | 0.070568 | 0.048296 | 0.093468 | 0.060215 |
| 0.739017 | 0.173571 | 0.49017  | 0.716753 | 0.325123 | 0.322639 | 0.843365 |
| 0.01304  | 0.016227 | 0.011338 | 0.011649 | 0.010223 | 0.014426 | 0.011474 |
| 0.198253 | 0.510415 | 0.228309 | 0.309938 | 0.197562 | 0.101977 | 0.063527 |
| 0.065788 | 0.564391 | 0.056119 | 0.058816 | 0.062022 | 0.046845 | 0.0498   |
| 0.644219 | 0.428027 | 0.541305 | 0.683923 | 0.496687 | 0.403122 | 0.509695 |
| 0.132189 | 0.085343 | 0.222822 | 0.145293 | 0.11413  | 0.072365 | 0.047999 |
| 0.049231 | 0.051529 | 0.057958 | 0.062171 | 0.034425 | 0.048989 | 0.047047 |
