# Supplementary figures and images for: cg04448376, cg24387542, cg08548498, and cg14621323 as a Novel Signature to Predict Prognosis in Kidney Renal Papillary Cell Carcinoma
Source: Hindawi journal article supplement (doi:10.1155/2020/4854390), 2020-01-01

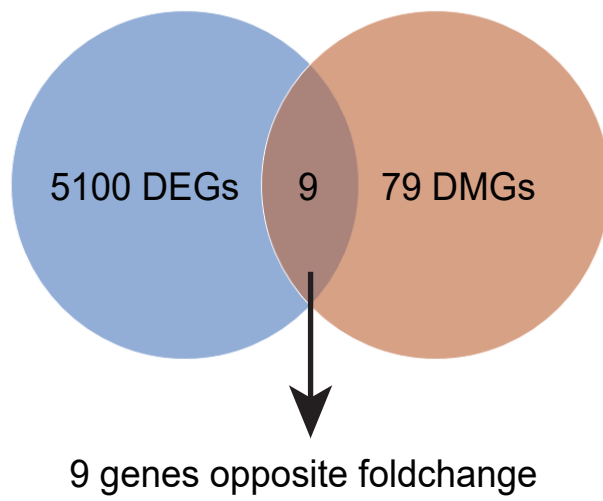

Supplement: f1 [file 4854390.f1.zip]
